# Supplementary material for: Molecular and Physiological Responses of Citrus sinensis Leaves to Long-Term Low pH Revealed by RNA-Seq Integrated with Targeted Metabolomics
Source: MDPI journal article supplement (doi:10.3390/ijms23105844), 2022-05-23
Supplement: s1 [file s1]

## Tables S1 and S7-S13

**Table S1.** Summary of the RNA-Seq data and genes mapped to the reference genome on pH 6.0-treated and of pH 2.5-treated leaves of *Citrus sinensis*. Q30 mean sequencing error rates lower than 1%.

| Treatment | Raw reads  | Clean reads (%)     | Clean bases (Gb) | Q30    | Mapped reads        | Uniquely mapped reads | Multiply mapped reads |
|-----------|------------|---------------------|------------------|--------|---------------------|-----------------------|-----------------------|
| pH 6.0    | 50,389,536 | 50,228,642 (99.68%) | 7.45             | 94.80% | 37,659,970 (74.98%) | 36,187,884 (72.05%)   | 1,472,086 (2.93%)     |
| pH 6.0    | 48,426,068 | 48,295,318 (99.73%) | 7.17             | 94.71% | 36,024,658 (74.59%) | 34,458,981 (71.35%)   | 1,565,677 (3.24%)     |
| pH 6.0    | 46,323,150 | 46,175,570 (99.68%) | 6.86             | 94.73% | 34,637,340 (75.01%) | 33,275,554 (72.06%)   | 1,361,786 (2.95%)     |
| pH 2.5    | 61,080,186 | 60,718,602 (99.41%) | 9.00             | 94.86% | 43,940,267 (72.37%) | 42,317,244 (69.69%)   | 1,623,023 (2.67%)     |
| pH 2.5    | 56,127,540 | 55,881,184 (99.56%) | 8.29             | 94.88% | 41,328,864 (73.96%) | 39,673,313 (71.00%)   | 1,655,551 (2.96%)     |

**Table S7.** Differentially expressed genes (DEGs) related to photosynthesis in low pH-treated *Citrus sinensis* leaves

| Accession No.                                                                | KEGG_annotation                                                                                                                                                                   | Swissprot_annotation (NR_annotation)                                                                  | Log <sub>2</sub> (fold change) |
|------------------------------------------------------------------------------|-----------------------------------------------------------------------------------------------------------------------------------------------------------------------------------|-------------------------------------------------------------------------------------------------------|--------------------------------|
| <i>Porphyrim and chlorophyll metabolism (cit00860, corrected P = 0.0005)</i> |                                                                                                                                                                                   |                                                                                                       |                                |
| Cs8g01360                                                                    | K01885 8.0e-87 cit:102612397 K01885 glutamyl-tRNA synthetase [EC:6.1.1.17]   (RefSeq) glutamate--tRNA ligase, chloroplastic/mitochondrial                                         | Glutamate--tRNA ligase, chloroplastic/mitochondrial OS=Arabidopsis thaliana OX=3702 GN=OVA3 PE=1 SV=1 | -1.006                         |
| Cs4g07830                                                                    | K02259 2.5e-61 cit:102630339 K02259 cytochrome c oxidase assembly protein subunit 15   (RefSeq) cytochrome c oxidase assembly protein COX15                                       | Cytochrome c oxidase assembly protein COX15 OS=Arabidopsis thaliana OX=3702 GN=COX15 PE=2 SV=1        | -1.542                         |
| Cs3g16730                                                                    | K02492 4.2e-206 cit:102624392 K02492 glutamyl-tRNA reductase [EC:1.2.1.70]   (RefSeq) glutamyl-tRNA reductase 1, chloroplastic                                                    | Glutamyl-tRNA reductase 1, chloroplastic OS=Cucumis sativus OX=3659 GN=HEMA1 PE=2 SV=1                | -1.277                         |
| Cs5g10740                                                                    | K10960 3.6e-141 cic:CICLE_v10020061mg K10960 geranylgeranyl diphosphate/geranylgeranyl-bacteriochlorophyllide a reductase [EC:1.3.1.83 1.3.1.111]   (RefSeq) hypothetical protein | Geranylgeranyl diphosphate reductase, chloroplastic OS=Arabidopsis thaliana OX=3702 GN=CHLP PE=1 SV=1 | -1.716                         |
| Cs2g05100                                                                    | K03405 6.0e-194 cit:102620862 K03405 magnesium chelatase subunit I [EC:6.6.1.1]   (RefSeq) magnesium-chelatase subunit ChII, chloroplastic                                        | Magnesium-chelatase subunit ChII, chloroplastic OS=Glycine max OX=3847 GN=CHLI PE=2 SV=1              | -1.158                         |
| Cs9g04920                                                                    | K19073 8.5e-235 cit:102611623 K19073 divinyl chlorophyllide a 8-vinyl-reductase [EC:1.3.1.75]   (RefSeq) divinyl chlorophyllide a 8-vinyl-reductase, chloroplastic                | Divinyl chlorophyllide a 8-vinyl-reductase, chloroplastic OS=Cucumis sativus OX=3659 GN=DVR PE=1 SV=1 | -1.624                         |
| Cs1g06850                                                                    | K00218 5.4e-124 cit:102614959 K00218 protochlorophyllide reductase [EC:1.3.1.33]   (RefSeq) protochlorophyllide reductase, chloroplastic                                          | Protochlorophyllide reductase, chloroplastic OS=Cucumis sativus OX=3659 GN=PORA PE=2 SV=1             | -1.307                         |
| Cs3g19770                                                                    | K21604 3.0e-71 cit:102608592 K21604 jasmonoyl-L-amino acid hydrolase [EC:3.5.1.127]   (RefSeq) IAA-amino acid hydrolase ILR1-like 6                                               | IAA-amino acid hydrolase ILR1-like 6 OS=Oryza sativa subsp. japonica OX=39947 GN=ILL6 PE=2 SV=1       | -1.120                         |
| Cs7g13850                                                                    | K01749 3.5e-93 cic:CICLE_v10031858mg K01749 hydroxymethylbilane synthase [EC:2.5.1.61]   (RefSeq) hypothetical protein                                                            | Porphobilinogen deaminase, chloroplastic OS=Pisum sativum OX=3888 GN=HEMC PE=1 SV=1                   | -1.414                         |
|                                                                              |                                                                                                                                                                                   |                                                                                                       |                                |
| <i>Carotenoid biosynthesis (cit00906, corrected P = 0.0579)</i>              |                                                                                                                                                                                   |                                                                                                       |                                |
| Cs4g14850                                                                    | K06444 8.6e-73 cic:CICLE_v10008410mg K06444 lycopene epsilon-cyclase [EC:5.5.1.18]   (RefSeq) hypothetical protein                                                                | Lycopene epsilon cyclase, chloroplastic OS=Arabidopsis thaliana OX=3702 GN=LUT2 PE=1 SV=2             | -1.121                         |
| Cs5g26080                                                                    | K09839 2.5e-150 cic:CICLE_v10019925mg K09839 violaxanthin de-epoxidase [EC:1.23.5.1]   (RefSeq) hypothetical protein                                                              | Violaxanthin de-epoxidase, chloroplastic OS=Spinacia oleracea OX=3562 GN=VDE1 PE=1 SV=2               | -1.246                         |

|                                                         |                                                                                                                                                               |                                                                                                             |        |
|---------------------------------------------------------|---------------------------------------------------------------------------------------------------------------------------------------------------------------|-------------------------------------------------------------------------------------------------------------|--------|
| Cs3g11180                                               | K00514 7.0e-92 cit:102577969 K00514 zeta-carotene desaturase [EC:1.3.5.6]   (RefSeq) ZDS                                                                      | Zeta-carotene desaturase, chloroplastic/chromoplastic OS=Capsicum annuum OX=4072 GN=ZDS PE=1 SV=1           | -1.675 |
| Cs3g23530                                               | K09843 6.6e-61 cit:CICLE_v10001043mg K09843 (+)-abscisic acid 8'-hydroxylase [EC:1.14.14.137]   (RefSeq) hypothetical protein                                 | Abscisic acid 8'-hydroxylase 3 OS=Oryza sativa subsp. japonica OX=39947 GN=CYP707A7 PE=2 SV=1               | -2.593 |
| orange1.1t06069                                         | K00514 1.4e-32 cit:102577969 K00514 zeta-carotene desaturase [EC:1.3.5.6]   (RefSeq) ZDS                                                                      | Zeta-carotene desaturase, chloroplastic/chromoplastic OS=Tagetes erecta OX=13708 PE=2 SV=1                  | 1.528  |
| <b>Photosynthesis (GO:0015979; adjusted P = 0.0030)</b> |                                                                                                                                                               |                                                                                                             |        |
| Cs1g06850                                               | K00218 5.4e-124 cit:102614959 K00218 protochlorophyllide reductase [EC:1.3.1.33]   (RefSeq) protochlorophyllide reductase, chloroplastic                      | Protochlorophyllide reductase, chloroplastic OS=Cucumis sativus OX=3659 GN=PORA PE=2 SV=1                   | -1.307 |
| Cs1g09310                                               | K02689 1.7e-31 aip:110272002 K02689 photosystem I P700 chlorophyll a apoprotein A1   (RefSeq) uncharacterized protein LOC110272002                            | Photosystem I P700 chlorophyll a apoprotein A1 OS=Agrostis stolonifera OX=63632 GN=psaA PE=3 SV=1           | -1.422 |
| Cs1g18810                                               | K02706 3.6e-50 ini:29082209 K02706 photosystem II P680 reaction center D2 protein [EC:1.10.3.9]   (RefSeq) psbD, IPN_cp071; photosystem II protein D2         | Photosystem II D2 protein OS=Cuscuta exaltata OX=476139 GN=psbD PE=3 SV=1                                   | -1.726 |
| Cs1g23450                                               | K02716 2.8e-165 cit:CICLE_v10026034mg K02716 photosystem II oxygen-evolving enhancer protein 1   (RefSeq) hypothetical protein                                | Oxygen-evolving enhancer protein 1, chloroplastic OS=Nicotiana tabacum OX=4097 GN=PSBO PE=2 SV=1            | -1.142 |
| Cs1g25510                                               | K02641 5.8e-47 cit:CICLE_v10027108mg K02641 ferredoxin--NADP+ reductase [EC:1.18.1.2]   (RefSeq) hypothetical protein                                         | Ferredoxin--NADP reductase, leaf-type isozyme, chloroplastic OS=Nicotiana tabacum OX=4097 GN=PETH PE=2 SV=1 | -1.068 |
| Cs2g05100                                               | K03405 6.0e-194 cit:102620862 K03405 magnesium chelatase subunit I [EC:6.6.1.1]   (RefSeq) magnesium-chelatase subunit ChII, chloroplastic                    | Magnesium-chelatase subunit ChII, chloroplastic OS=Glycine max OX=3847 GN=CHLI PE=2 SV=1                    | -1.158 |
| Cs2g09070                                               | K02703 1.7e-97 aly:32283147 K02703 photosystem II P680 reaction center D1 protein [EC:1.10.3.9]   (RefSeq) psbA, B9N47_pgp099; photosystem II protein D1      | Photosystem II protein D1 OS=Anthoceros angustus OX=48387 GN=psbA PE=2 SV=1                                 | -2.156 |
| Cs2g15180                                               | K03798 3.4e-271 cit:102623114 K03798 cell division protease FtsH [EC:3.4.24.-]   (RefSeq) ATP-dependent zinc metalloprotease FTSH 2, chloroplastic isoform X1 | ATP-dependent zinc metalloprotease FTSH 2, chloroplastic OS=Arabidopsis thaliana OX=3702 GN=FTSH2 PE=1 SV=1 | -1.619 |
| Cs3g06200                                               | K02706 1.3e-87 aly:32283168 K02706 photosystem II P680 reaction center D2 protein [EC:1.10.3.9]   (RefSeq) psbD, B9N47_pgp079; photosystem II protein D2      | Photosystem II D2 protein OS=Acorus americanus OX=263995 GN=psbD PE=3 SV=1                                  | -1.894 |
| Cs3g27030                                               | K03798 3.5e-297 cit:102607431 K03798 cell division protease FtsH [EC:3.4.24.-]   (RefSeq) ATP-dependent zinc metalloprotease FTSH, chloroplastic              | ATP-dependent zinc metalloprotease FTSH 5, chloroplastic OS=Arabidopsis thaliana OX=3702 GN=FTSH5 PE=1 SV=1 | -1.218 |

|                                                                                  |                                                                                                                                                                                                   |                                                                                                                         |        |
|----------------------------------------------------------------------------------|---------------------------------------------------------------------------------------------------------------------------------------------------------------------------------------------------|-------------------------------------------------------------------------------------------------------------------------|--------|
| Cs4g07150                                                                        | K08908 9.5e-112 cit:102607051 K08908 light-harvesting complex I chlorophyll a/b binding protein 2   (RefSeq) photosystem I chlorophyll a/b-binding protein 6, chloroplastic isoform X1            | Photosystem I chlorophyll a/b-binding protein 6, chloroplastic OS=Arabidopsis thaliana OX=3702 GN=LHCA6 PE=1 SV=1       | -1.058 |
| Cs5g33500                                                                        | K00951 1.3e-88 cic:CICLE_v10018801mg K00951 GTP pyrophosphokinase [EC:2.7.6.5]   (RefSeq) hypothetical protein                                                                                    | Putative GTP diphosphokinase RSH1, chloroplastic OS=Arabidopsis thaliana OX=3702 GN=RSH1 PE=1 SV=1                      | -1.345 |
| Cs5g34250                                                                        |                                                                                                                                                                                                   | Pentatricopeptide repeat-containing protein At2g15820, chloroplastic OS=Arabidopsis thaliana OX=3702 GN=OTP51 PE=2 SV=3 | -1.618 |
| Cs7g31190                                                                        | K08915 5.5e-137 cic:CICLE_v10032377mg K08915 light-harvesting complex II chlorophyll a/b binding protein 4   (RefSeq) hypothetical protein                                                        | Chlorophyll a-b binding protein CP29.3, chloroplastic OS=Arabidopsis thaliana OX=3702 GN=LHCB4.3 PE=2 SV=1              | -1.018 |
| orange1.1t00477                                                                  | K15111 4.9e-40 spen:107015750 K15111 solute carrier family 25 (mitochondrial S-adenosylmethionine transporter), member 26   (RefSeq) LOW QUALITY PROTEIN: protein MITOFERRINLIKE 1, chloroplastic | Protein WHAT'S THIS FACTOR 1 homolog, chloroplastic OS=Arabidopsis thaliana OX=3702 GN=At4g01037 PE=3 SV=1              | -1.774 |
| orange1.1t01775                                                                  | K03070 1.2e-82 cit:102630213 K03070 preprotein translocase subunit SecA [EC:7.4.2.8]   (RefSeq) protein translocase subunit SecA, chloroplastic                                                   | Protein translocase subunit SecA, chloroplastic OS=Spinacia oleracea OX=3562 GN=secA PE=1 SV=1                          | -1.357 |
|                                                                                  |                                                                                                                                                                                                   |                                                                                                                         |        |
| <b>Photosynthesis - antenna proteins (cit00196; corrected P = 0.3519)</b>        |                                                                                                                                                                                                   |                                                                                                                         |        |
| Cs7g31190                                                                        | K08915 5.5e-137 cic:CICLE_v10032377mg K08915 light-harvesting complex II chlorophyll a/b binding protein 4   (RefSeq) hypothetical protein                                                        | Chlorophyll a-b binding protein CP29.3, chloroplastic OS=Arabidopsis thaliana OX=3702 GN=LHCB4.3 PE=2 SV=1              | -1.018 |
| Cs4g07150                                                                        | K08908 9.5e-112 cit:102607051 K08908 light-harvesting complex I chlorophyll a/b binding protein 2   (RefSeq) photosystem I chlorophyll a/b-binding protein 6, chloroplastic isoform X1            | Photosystem I chlorophyll a/b-binding protein 6, chloroplastic OS=Arabidopsis thaliana OX=3702 GN=LHCA6 PE=1 SV=1       | -1.058 |
|                                                                                  |                                                                                                                                                                                                   |                                                                                                                         |        |
| <b>Photosynthetic electron transport chain (GO:0009767; adjusted P = 0.0294)</b> |                                                                                                                                                                                                   |                                                                                                                         |        |
| Cs1g18810                                                                        | K02706 3.6e-50 ini:29082209 K02706 photosystem II P680 reaction center D2 protein [EC:1.10.3.9]   (RefSeq) psbD, IPN_cp071; photosystem II protein D2                                             | Photosystem II D2 protein OS=Cuscuta exaltata OX=476139 GN=psbD PE=3 SV=1                                               | -1.726 |
| Cs1g25510                                                                        | K02641 5.8e-47 cic:CICLE_v10027108mg K02641 ferredoxin--NADP+ reductase [EC:1.18.1.2]   (RefSeq) hypothetical protein                                                                             | Ferredoxin--NADP reductase, leaf-type isozyme, chloroplastic OS=Nicotiana tabacum OX=4097 GN=PETH PE=2 SV=1             | -1.068 |

|                                                                         |                                                                                                                                                               |                                                                                                             |        |
|-------------------------------------------------------------------------|---------------------------------------------------------------------------------------------------------------------------------------------------------------|-------------------------------------------------------------------------------------------------------------|--------|
| Cs2g09070                                                               | K02703 1.7e-97 aly:32283147 K02703 photosystem II P680 reaction center D1 protein [EC:1.10.3.9]   (RefSeq) psbA, B9N47_pgp099; photosystem II protein D1      | Photosystem II protein D1 OS=Anthoceros angustus OX=48387 GN=psbA PE=2 SV=1                                 | -2.156 |
| Cs2g15180                                                               | K03798 3.4e-271 cit:102623114 K03798 cell division protease FtsH [EC:3.4.24.-]   (RefSeq) ATP-dependent zinc metalloprotease FTSH 2, chloroplastic isoform X1 | ATP-dependent zinc metalloprotease FTSH 2, chloroplastic OS=Arabidopsis thaliana OX=3702 GN=FTSH2 PE=1 SV=1 | -1.619 |
| Cs3g06200                                                               | K02706 1.3e-87 aly:32283168 K02706 photosystem II P680 reaction center D2 protein [EC:1.10.3.9]   (RefSeq) psbD, B9N47_pgp079; photosystem II protein D2      | Photosystem II D2 protein OS=Acorus americanus OX=263995 GN=psbD PE=3 SV=1                                  | -1.894 |
| Cs3g27030                                                               | K03798 3.5e-297 cit:102607431 K03798 cell division protease FtsH [EC:3.4.24.-]   (RefSeq) ATP-dependent zinc metalloprotease FTSH, chloroplastic              | ATP-dependent zinc metalloprotease FTSH 5, chloroplastic OS=Arabidopsis thaliana OX=3702 GN=FTSH5 PE=1 SV=1 | -1.218 |
| <i>Photosynthesis, light reaction (GO:0019684; adjusted P = 0.0074)</i> |                                                                                                                                                               |                                                                                                             |        |
| Cs1g18810                                                               | K02706 3.6e-50 ini:29082209 K02706 photosystem II P680 reaction center D2 protein [EC:1.10.3.9]   (RefSeq) psbD, IPN_cp071; photosystem II protein D2         | Photosystem II D2 protein OS=Cuscuta exaltata OX=476139 GN=psbD PE=3 SV=1                                   | -1.726 |
| Cs1g23450                                                               | K02716 2.8e-165 cic:CICLE_v10026034mg K02716 photosystem II oxygen-evolving enhancer protein 1   (RefSeq) hypothetical protein                                | Oxygen-evolving enhancer protein 1, chloroplastic OS=Nicotiana tabacum OX=4097 GN=PSBO PE=2 SV=1            | -1.142 |
| Cs1g25510                                                               | K02641 5.8e-47 cic:CICLE_v10027108mg K02641 ferredoxin--NADP+ reductase [EC:1.18.1.2]   (RefSeq) hypothetical protein                                         | Ferredoxin--NADP reductase, leaf-type isozyme, chloroplastic OS=Nicotiana tabacum OX=4097 GN=PETH PE=2 SV=1 | -1.068 |
| Cs2g09070                                                               | K02703 1.7e-97 aly:32283147 K02703 photosystem II P680 reaction center D1 protein [EC:1.10.3.9]   (RefSeq) psbA, B9N47_pgp099; photosystem II protein D1      | Photosystem II protein D1 OS=Anthoceros angustus OX=48387 GN=psbA PE=2 SV=1                                 | -2.156 |
| Cs2g15180                                                               | K03798 3.4e-271 cit:102623114 K03798 cell division protease FtsH [EC:3.4.24.-]   (RefSeq) ATP-dependent zinc metalloprotease FTSH 2, chloroplastic isoform X1 | ATP-dependent zinc metalloprotease FTSH 2, chloroplastic OS=Arabidopsis thaliana OX=3702 GN=FTSH2 PE=1 SV=1 | -1.619 |
| Cs3g06200                                                               | K02706 1.3e-87 aly:32283168 K02706 photosystem II P680 reaction center D2 protein [EC:1.10.3.9]   (RefSeq) psbD, B9N47_pgp079; photosystem II protein D2      | Photosystem II D2 protein OS=Acorus americanus OX=263995 GN=psbD PE=3 SV=1                                  | -1.894 |
| Cs3g27030                                                               | K03798 3.5e-297 cit:102607431 K03798 cell division protease FtsH [EC:3.4.24.-]   (RefSeq) ATP-dependent zinc metalloprotease FTSH, chloroplastic              | ATP-dependent zinc metalloprotease FTSH 5, chloroplastic OS=Arabidopsis thaliana OX=3702 GN=FTSH5 PE=1 SV=1 | -1.218 |

|                                                                                        |                                                                                                                                                                                        |                                                                                                                         |        |
|----------------------------------------------------------------------------------------|----------------------------------------------------------------------------------------------------------------------------------------------------------------------------------------|-------------------------------------------------------------------------------------------------------------------------|--------|
| Cs4g07150                                                                              | K08908 9.5e-112 cit:102607051 K08908 light-harvesting complex I chlorophyll a/b binding protein 2   (RefSeq) photosystem I chlorophyll a/b-binding protein 6, chloroplastic isoform X1 | Photosystem I chlorophyll a/b-binding protein 6, chloroplastic OS=Arabidopsis thaliana OX=3702 GN=LHCA6 PE=1 SV=1       | -1.058 |
| Cs5g34250                                                                              |                                                                                                                                                                                        | Pentatricopeptide repeat-containing protein At2g15820, chloroplastic OS=Arabidopsis thaliana OX=3702 GN=OTP51 PE=2 SV=3 | -1.618 |
| Cs7g31190                                                                              | K08915 5.5e-137 cic:CICLE_v10032377mg K08915 light-harvesting complex II chlorophyll a/b binding protein 4   (RefSeq) hypothetical protein                                             | Chlorophyll a-b binding protein CP29.3, chloroplastic OS=Arabidopsis thaliana OX=3702 GN=LHCB4.3 PE=2 SV=1              | -1.018 |
|                                                                                        |                                                                                                                                                                                        |                                                                                                                         |        |
| <i>Carbon fixation in photosynthetic organisms (cit00710; corrected P &lt; 0.0001)</i> |                                                                                                                                                                                        |                                                                                                                         |        |
| orange1.1t00226                                                                        | K00615 1.8e-253 cic:CICLE_v10018991mg K00615 transketolase [EC:2.2.1.1]   (RefSeq) hypothetical protein                                                                                | Transketolase, chloroplastic OS=Zea mays OX=4577 PE=1 SV=1                                                              | -1.337 |
| Cs3g10480                                                                              | K01807 1.9e-150 cic:CICLE_v10002135mg K01807 ribose 5-phosphate isomerase A [EC:5.3.1.6]   (RefSeq) hypothetical protein                                                               | Probable ribose-5-phosphate isomerase 3, chloroplastic OS=Arabidopsis thaliana OX=3702 GN=RPI3 PE=1 SV=1                | -1.730 |
| Cs5g10920                                                                              | K01783 3.3e-19 adu:107472214 K01783 ribulose-phosphate 3-epimerase [EC:5.1.3.1]   (RefSeq) ribulose-phosphate 3-epimerase, chloroplastic                                               | Ribulose-5-phosphate-3-epimerase, chloroplastic OS=Arabidopsis thaliana OX=3702 GN=RPE PE=2 SV=1                        | -1.001 |
| Cs5g10730                                                                              | K00026 2.1e-223 cit:102628532 K00026 malate dehydrogenase [EC:1.1.1.37]   (RefSeq) malate dehydrogenase, chloroplastic                                                                 | Malate dehydrogenase, chloroplastic OS=Arabidopsis thaliana OX=3702 GN=At3g47520 PE=1 SV=1                              | -1.256 |
| Cs3g08480                                                                              | K00855 1.4e-97 cic:CICLE_v10001344mg K00855 phosphoribulokinase [EC:2.7.1.19]   (RefSeq) hypothetical protein                                                                          | Phosphoribulokinase, chloroplastic OS=Mesembryanthemum crystallinum OX=3544 PE=2 SV=1                                   | -1.341 |
| orange1.1t03280                                                                        | K00927 9.7e-74 cic:CICLE_v10004891mg K00927 phosphoglycerate kinase [EC:2.7.2.3]   (RefSeq) hypothetical protein                                                                       | Phosphoglycerate kinase, chloroplastic OS=Nicotiana tabacum OX=4097 PE=2 SV=1                                           | -1.999 |
| Cs2g13700                                                                              | K01807 3.2e-144 cit:102627714 K01807 ribose 5-phosphate isomerase A [EC:5.3.1.6]   (RefSeq) probable ribose-5-phosphate isomerase 2                                                    | Probable ribose-5-phosphate isomerase 2 OS=Arabidopsis thaliana OX=3702 GN=RPI2 PE=1 SV=1                               | -1.305 |
| Cs6g07430                                                                              | K03841 1.5e-138 cic:CICLE_v10011855mg K03841 fructose-1,6-bisphosphatase I [EC:3.1.3.11]   (RefSeq) hypothetical protein                                                               | Fructose-1,6-bisphosphatase 1, chloroplastic OS=Arabidopsis thaliana OX=3702 GN=CFBP1 PE=1 SV=2                         | -1.619 |
| Cs2g15520                                                                              | K01595 6.0e-206 cit:102607204 K01595 phosphoenolpyruvate carboxylase [EC:4.1.1.31]   (RefSeq) phosphoenolpyruvate carboxylase 2                                                        | Phosphoenolpyruvate carboxylase 1 OS=Arabidopsis thaliana OX=3702 GN=PPC1 PE=1 SV=1                                     | -2.477 |
| Cs7g31640                                                                              | K01100 1.2e-126 cic:CICLE_v10031765mg K01100 sedoheptulose-bisphosphatase [EC:3.1.3.37]   (RefSeq) hypothetical protein                                                                | Sedoheptulose-1,7-bisphosphatase, chloroplastic OS=Triticum aestivum OX=4565 PE=2 SV=1                                  | -1.175 |

|                                                            |                                                                                                                                                              |                                                                                             |        |
|------------------------------------------------------------|--------------------------------------------------------------------------------------------------------------------------------------------------------------|---------------------------------------------------------------------------------------------|--------|
| Cs1g20920                                                  | K01610 1.9e-101 cit:102629129 K01610 phosphoenolpyruvate carboxykinase (ATP) [EC:4.1.1.49]   (RefSeq) phosphoenolpyruvate carboxykinase (ATP)-like           | Phosphoenolpyruvate carboxykinase (ATP) 1 OS=Arabidopsis thaliana OX=3702 GN=PCK1 PE=1 SV=1 | 1.058  |
| Cs7g25390                                                  | K00026 1.5e-53 cic:CICLE_v10008562mg K00026 malate dehydrogenase [EC:1.1.1.37]   (RefSeq) hypothetical protein                                               | Malate dehydrogenase, mitochondrial OS=Citrullus lanatus OX=3654 GN=MMDH PE=1 SV=1          | -1.555 |
|                                                            |                                                                                                                                                              |                                                                                             |        |
| <i>Stomatal movement (GO:0010118; adjusted P = 0.8090)</i> |                                                                                                                                                              |                                                                                             |        |
| Cs1g13200                                                  | K14558 9.9e-260 cit:102614962 K14558 periodic tryptophan protein 2   (RefSeq) periodic tryptophan protein 2                                                  | Periodic tryptophan protein 2 OS=Arabidopsis thaliana OX=3702 GN=PWP2 PE=1 SV=1             | -1.251 |
| Cs5g04280                                                  | K14638 2.0e-181 cit:102607539 K14638 solute carrier family 15 (peptide/histidine transporter), member 3/4   (RefSeq) protein NRT1/ PTR FAMILY 4.6 isoform X1 | Protein NRT1/ PTR FAMILY 4.6 OS=Arabidopsis thaliana OX=3702 GN=NPF4.6 PE=1 SV=1            | -1.838 |

**Table S8.** Differentially expressed genes (DEGs) related to carbohydrate and energy metabolisms in low pH-treated *Citrus sinensis* leaves

| Accession No.                                             | KEGG_annotation                                                                                                                                                                                                                        | Swissprot_annotation (NR_annotation)                                                                                                              | Log <sub>2</sub> (fold change) |
|-----------------------------------------------------------|----------------------------------------------------------------------------------------------------------------------------------------------------------------------------------------------------------------------------------------|---------------------------------------------------------------------------------------------------------------------------------------------------|--------------------------------|
| <i>Carbon metabolism (cit01200; corrected P = 0.0008)</i> |                                                                                                                                                                                                                                        |                                                                                                                                                   |                                |
| Cs3g10480                                                 | K01807 1.9e-150 cic:CICLE_v10002135mg K01807 ribose 5-phosphate isomerase A [EC:5.3.1.6]   (RefSeq) hypothetical protein                                                                                                               | Probable ribose-5-phosphate isomerase 3, chloroplastic OS=Arabidopsis thaliana OX=3702 GN=RPI3 PE=1 SV=1                                          | -1.730                         |
| Cs7g13170                                                 | K00627 2.3e-167 cit:102609118 K00627 pyruvate dehydrogenase E2 component (dihydrolipoamide acetyltransferase) [EC:2.3.1.12]   (RefSeq) dihydrolipoamide acetyltransferase component 4 of pyruvate dehydrogenase complex, chloroplastic | Dihydrolipoamide acetyltransferase component 4 of pyruvate dehydrogenase complex, chloroplastic OS=Arabidopsis thaliana OX=3702 GN=LTA2 PE=2 SV=1 | -1.118                         |
| orange1.1t03280                                           | K00927 9.7e-74 cic:CICLE_v10004891mg K00927 phosphoglycerate kinase [EC:2.7.2.3]   (RefSeq) hypothetical protein                                                                                                                       | Phosphoglycerate kinase, chloroplastic OS=Nicotiana tabacum OX=4097 PE=2 SV=1                                                                     | -1.999                         |
| Cs5g10920                                                 | K01783 3.3e-19 adu:107472214 K01783 ribulose-phosphate 3-epimerase [EC:5.1.3.1]   (RefSeq) ribulose-phosphate 3-epimerase, chloroplastic                                                                                               | Ribulose-5-phosphate-3-epimerase, chloroplastic OS=Arabidopsis thaliana OX=3702 GN=RPE PE=2 SV=1                                                  | -1.001                         |
| Cs7g31640                                                 | K01100 1.2e-126 cic:CICLE_v10031765mg K01100 sedoheptulose-bisphosphatase [EC:3.1.3.37]   (RefSeq) hypothetical protein                                                                                                                | Sedoheptulose-1,7-bisphosphatase, chloroplastic OS=Triticum aestivum OX=4565 PE=2 SV=1                                                            | -1.175                         |
| Cs7g25390                                                 | K00026 1.5e-53 cic:CICLE_v10008562mg K00026 malate dehydrogenase [EC:1.1.1.37]   (RefSeq) hypothetical protein                                                                                                                         | Malate dehydrogenase, mitochondrial OS=Citrullus lanatus OX=3654 GN=MMDH PE=1 SV=1                                                                | -1.555                         |
| Cs2g02890                                                 | K00605 5.7e-118 cic:CICLE_v10015433mg K00605 aminomethyltransferase [EC:2.1.2.10]   (RefSeq) hypothetical protein                                                                                                                      | Aminomethyltransferase, mitochondrial OS=Solanum tuberosum OX=4113 GN=GDCST PE=2 SV=1                                                             | -1.910                         |
| Cs4g18520                                                 | K00281 5.5e-312 cit:102627653 K00281 glycine dehydrogenase [EC:1.4.4.2]   (RefSeq) glycine dehydrogenase (decarboxylating), mitochondrial                                                                                              | Glycine dehydrogenase (decarboxylating) A, mitochondrial OS=Flaveria pringlei OX=4226 GN=GDCSPA PE=2 SV=1                                         | -1.292                         |
| Cs9g02530                                                 | K01913 1.0e-266 cic:CICLE_v10004645mg K01913 acetate/butyrate---CoA ligase [EC:6.2.1.1 6.2.1.2]   (RefSeq) hypothetical protein                                                                                                        | Acetate/butyrate--CoA ligase AAE7, peroxisomal OS=Arabidopsis thaliana OX=3702 GN=AAE7 PE=1 SV=1                                                  | -1.210                         |
| Cs7g14430                                                 | K00121 1.7e-106 cit:102622247 K00121 S-(hydroxymethyl)glutathione dehydrogenase / alcohol dehydrogenase [EC:1.1.1.284 1.1.1.1]   (RefSeq) alcohol dehydrogenase-like 2 isoform X1                                                      | CYP enzymes assisting alcohol dehydrogenase OS=Catharanthus roseus OX=4058 GN=CYPADH PE=1 SV=1                                                    | 1.605                          |
| Cs6g07430                                                 | K03841 1.5e-138 cic:CICLE_v10011855mg K03841 fructose-1,6-bisphosphatase I [EC:3.1.3.11]   (RefSeq) hypothetical protein                                                                                                               | Fructose-1,6-bisphosphatase 1, chloroplastic OS=Arabidopsis thaliana OX=3702 GN=CFBP1 PE=1 SV=2                                                   | -1.619                         |



|                                                                       |                                                                                                                                                                           |                                                                                                                          |        |
|-----------------------------------------------------------------------|---------------------------------------------------------------------------------------------------------------------------------------------------------------------------|--------------------------------------------------------------------------------------------------------------------------|--------|
| Cs2g15520                                                             | K01595 6.0e-206 cit:102607204 K01595 phosphoenolpyruvate carboxylase [EC:4.1.1.31]   (RefSeq) phosphoenolpyruvate carboxylase 2                                           | Phosphoenolpyruvate carboxylase 1 OS=Arabidopsis thaliana OX=3702 GN=PPC1 PE=1 SV=1                                      | -2.477 |
| Cs9g01670                                                             | K00382 3.8e-234 cit:102627107 K00382 dihydrolipoamide dehydrogenase [EC:1.8.1.4]   (RefSeq) dihydrolipoamide dehydrogenase 1, mitochondrial isoform X1                    | Dihydrolipoamide dehydrogenase 1, mitochondrial OS=Arabidopsis thaliana OX=3702 GN=LPD1 PE=1 SV=2                        | -2.754 |
| Cs3g11490                                                             | K01738 3.2e-72 cic:CICLE_v10001793mg K01738 cysteine synthase [EC:2.5.1.47]   (RefSeq) hypothetical protein                                                               | Cysteine synthase, chloroplastic/chromoplastic OS=Solanum tuberosum OX=4113 PE=2 SV=1                                    | -1.300 |
| Cs7g11110                                                             | K00036 2.2e-114 cit:102624333 K00036 glucose-6-phosphate 1-dehydrogenase [EC:1.1.1.49 1.1.1.363]   (RefSeq) glucose-6-phosphate 1-dehydrogenase, chloroplastic isoform X1 | Glucose-6-phosphate 1-dehydrogenase, chloroplastic OS=Nicotiana tabacum OX=4097 PE=2 SV=1                                | -1.151 |
| Cs2g13700                                                             | K01807 3.2e-144 cit:102627714 K01807 ribose 5-phosphate isomerase A [EC:5.3.1.6]   (RefSeq) probable ribose-5-phosphate isomerase 2                                       | Probable ribose-5-phosphate isomerase 2 OS=Arabidopsis thaliana OX=3702 GN=RPI2 PE=1 SV=1                                | -1.305 |
| Cs5g10730                                                             | K00026 2.1e-223 cit:102628532 K00026 malate dehydrogenase [EC:1.1.1.37]   (RefSeq) malate dehydrogenase, chloroplastic                                                    | Malate dehydrogenase, chloroplastic OS=Arabidopsis thaliana OX=3702 GN=At3g47520 PE=1 SV=1                               | -1.256 |
| Cs3g08480                                                             | K00855 1.4e-97 cic:CICLE_v10001344mg K00855 phosphoribulokinase [EC:2.7.1.19]   (RefSeq) hypothetical protein                                                             | Phosphoribulokinase, chloroplastic OS=Mesembryanthemum crystallinum OX=3544 PE=2 SV=1                                    | -1.341 |
| Cs1g20920                                                             | K01610 1.9e-101 cit:102629129 K01610 phosphoenolpyruvate carboxykinase (ATP) [EC:4.1.1.49]   (RefSeq) phosphoenolpyruvate carboxykinase (ATP)-like                        | Phosphoenolpyruvate carboxykinase (ATP) 1 OS=Arabidopsis thaliana OX=3702 GN=PCK1 PE=1 SV=1                              | 1.058  |
| orange1.1t00226                                                       | K00615 1.8e-253 cic:CICLE_v10018991mg K00615 transketolase [EC:2.2.1.1]   (RefSeq) hypothetical protein                                                                   | Transketolase, chloroplastic OS=Zea mays OX=4577 PE=1 SV=1                                                               | -1.337 |
|                                                                       |                                                                                                                                                                           |                                                                                                                          |        |
| <b>Starch and sucrose metabolism (cit00500; corrected P = 0.6822)</b> |                                                                                                                                                                           |                                                                                                                          |        |
| Cs9g06360                                                             | K00975 2.1e-69 cic:CICLE_v10004731mg K00975 glucose-1-phosphate adenylyltransferase [EC:2.7.7.27]   (RefSeq) hypothetical protein                                         | Glucose-1-phosphate adenylyltransferase large subunit 1, chloroplastic OS=Arabidopsis thaliana OX=3702 GN=ADG2 PE=1 SV=3 | -1.206 |
| orange1.1t05474                                                       | K01835 3.9e-26 cic:CICLE_v10014721mg K01835 phosphoglucomutase [EC:5.4.2.2]   (RefSeq) hypothetical protein                                                               | Phosphoglucomutase, cytoplasmic OS=Mesembryanthemum crystallinum OX=3544 GN=PGM1 PE=2 SV=1                               | -1.607 |

|                                                                      |                                                                                                                                                                           |                                                                                                           |        |
|----------------------------------------------------------------------|---------------------------------------------------------------------------------------------------------------------------------------------------------------------------|-----------------------------------------------------------------------------------------------------------|--------|
| Cs6g21370                                                            | K00703 1.0e-258 cit:102614846 K00703 starch synthase [EC:2.4.1.21]   (RefSeq) granule-bound starch synthase 2, chloroplastic/amyloplastic                                 | Granule-bound starch synthase 2, chloroplastic/amyloplastic OS=Solanum tuberosum OX=4113 GN=SS2 PE=1 SV=3 | -1.754 |
| Cs2g17050                                                            | K01835 1.1e-16 cit:CICLE_v10014721mg K01835 phosphoglucomutase [EC:5.4.2.2]   (RefSeq) hypothetical protein                                                               | Probable phosphoglucomutase, cytoplasmic 1 OS=Arabidopsis thaliana OX=3702 GN=At1g23190 PE=2 SV=2         | -1.761 |
| Cs7g01350                                                            | K01188 1.0e-74 cit:CICLE_v10031209mg K01188 beta-glucosidase [EC:3.2.1.21]   (RefSeq) hypothetical protein                                                                | Beta-glucosidase 13 OS=Oryza sativa subsp. japonica OX=39947 GN=BGLU13 PE=2 SV=2                          | -1.095 |
| <i>Pentose phosphate pathway (cit00030; corrected P = 0.0029)</i>    |                                                                                                                                                                           |                                                                                                           |        |
| orange1.1t00226                                                      | K00615 1.8e-253 cit:CICLE_v10018991mg K00615 transketolase [EC:2.2.1.1]   (RefSeq) hypothetical protein                                                                   | Transketolase, chloroplastic OS=Zea mays OX=4577 PE=1 SV=1                                                | -1.337 |
| Cs3g10480                                                            | K01807 1.9e-150 cit:CICLE_v10002135mg K01807 ribose 5-phosphate isomerase A [EC:5.3.1.6]   (RefSeq) hypothetical protein                                                  | Probable ribose-5-phosphate isomerase 3, chloroplastic OS=Arabidopsis thaliana OX=3702 GN=RPI3 PE=1 SV=1  | -1.730 |
| Cs7g11110                                                            | K00036 2.2e-114 cit:102624333 K00036 glucose-6-phosphate 1-dehydrogenase [EC:1.1.1.49 1.1.1.363]   (RefSeq) glucose-6-phosphate 1-dehydrogenase, chloroplastic isoform X1 | Glucose-6-phosphate 1-dehydrogenase, chloroplastic OS=Nicotiana tabacum OX=4097 PE=2 SV=1                 | -1.151 |
| Cs5g10920                                                            | K01783 3.3e-19 adu:107472214 K01783 ribulose-phosphate 3-epimerase [EC:5.1.3.1]   (RefSeq) ribulose-phosphate 3-epimerase, chloroplastic                                  | Ribulose-5-phosphate-3-epimerase, chloroplastic OS=Arabidopsis thaliana OX=3702 GN=RPE PE=2 SV=1          | -1.001 |
| Cs2g13700                                                            | K01807 3.2e-144 cit:102627714 K01807 ribose 5-phosphate isomerase A [EC:5.3.1.6]   (RefSeq) probable ribose-5-phosphate isomerase 2                                       | Probable ribose-5-phosphate isomerase 2 OS=Arabidopsis thaliana OX=3702 GN=RPI2 PE=1 SV=1                 | -1.305 |
| Cs6g07430                                                            | K03841 1.5e-138 cit:CICLE_v10011855mg K03841 fructose-1,6-bisphosphatase I [EC:3.1.3.11]   (RefSeq) hypothetical protein                                                  | Fructose-1,6-bisphosphatase 1, chloroplastic OS=Arabidopsis thaliana OX=3702 GN=CFBP1 PE=1 SV=2           | -1.619 |
| orange1.1t05474                                                      | K01835 3.9e-26 cit:CICLE_v10014721mg K01835 phosphoglucomutase [EC:5.4.2.2]   (RefSeq) hypothetical protein                                                               | Phosphoglucomutase, cytoplasmic OS=Mesembryanthemum crystallinum OX=3544 GN=PGM1 PE=2 SV=1                | -1.607 |
| Cs2g17050                                                            | K01835 1.1e-16 cit:CICLE_v10014721mg K01835 phosphoglucomutase [EC:5.4.2.2]   (RefSeq) hypothetical protein                                                               | Probable phosphoglucomutase, cytoplasmic 1 OS=Arabidopsis thaliana OX=3702 GN=At1g23190 PE=2 SV=2         | -1.761 |
| <i>Glycolysis / gluconeogenesis (cit00010; corrected P = 0.0148)</i> |                                                                                                                                                                           |                                                                                                           |        |

|                 |                                                                                                                                                                                                                                        |                                                                                                                                                   |        |
|-----------------|----------------------------------------------------------------------------------------------------------------------------------------------------------------------------------------------------------------------------------------|---------------------------------------------------------------------------------------------------------------------------------------------------|--------|
| orange1.1t03055 | K00002 1.2e-61 cic:CICLE_v10012243mg K00002 alcohol dehydrogenase (NADP+) [EC:1.1.1.2]   (RefSeq) hypothetical protein                                                                                                                 | NADPH-dependent aldo-keto reductase, chloroplastic OS=Arabidopsis thaliana OX=3702 GN=AKR4C9 PE=1 SV=1                                            | -1.133 |
| Cs7g13170       | K00627 2.3e-167 cit:102609118 K00627 pyruvate dehydrogenase E2 component (dihydrolipoamide acetyltransferase) [EC:2.3.1.12]   (RefSeq) dihydrolipoamide acetyltransferase component 4 of pyruvate dehydrogenase complex, chloroplastic | Dihydrolipoamide acetyltransferase component 4 of pyruvate dehydrogenase complex, chloroplastic OS=Arabidopsis thaliana OX=3702 GN=LTA2 PE=2 SV=1 | -1.118 |
| orange1.1t03280 | K00927 9.7e-74 cic:CICLE_v10004891mg K00927 phosphoglycerate kinase [EC:2.7.2.3]   (RefSeq) hypothetical protein                                                                                                                       | Phosphoglycerate kinase, chloroplastic OS=Nicotiana tabacum OX=4097 PE=2 SV=1                                                                     | -1.999 |
| Cs3g19820       | K00128 2.9e-44 cit:102611460 K00128 aldehyde dehydrogenase (NAD+) [EC:1.2.1.3]   (RefSeq) aldehyde dehydrogenase family 3 member H1                                                                                                    | Aldehyde dehydrogenase family 3 member H1 OS=Arabidopsis thaliana OX=3702 GN=ALDH3H1 PE=1 SV=2                                                    | -1.055 |
| Cs9g01670       | K00382 3.8e-234 cit:102627107 K00382 dihydrolipoamide dehydrogenase [EC:1.8.1.4]   (RefSeq) dihydrolipoamide dehydrogenase 1, mitochondrial isoform X1                                                                                 | Dihydrolipoamide dehydrogenase 1, mitochondrial OS=Arabidopsis thaliana OX=3702 GN=LPD1 PE=1 SV=2                                                 | -2.754 |
| Cs9g02530       | K01913 1.0e-266 cic:CICLE_v10004645mg K01913 acetate/butyrate---CoA ligase [EC:6.2.1.1 6.2.1.2]   (RefSeq) hypothetical protein                                                                                                        | Acetate/butyrate--CoA ligase AAE7, peroxisomal OS=Arabidopsis thaliana OX=3702 GN=AAE7 PE=1 SV=1                                                  | -1.210 |
| Cs6g07430       | K03841 1.5e-138 cic:CICLE_v10011855mg K03841 fructose-1,6-bisphosphatase I [EC:3.1.3.11]   (RefSeq) hypothetical protein                                                                                                               | Fructose-1,6-bisphosphatase 1, chloroplastic OS=Arabidopsis thaliana OX=3702 GN=CFBP1 PE=1 SV=2                                                   | -1.619 |
| orange1.1t05474 | K01835 3.9e-26 cic:CICLE_v10014721mg K01835 phosphoglucomutase [EC:5.4.2.2]   (RefSeq) hypothetical protein                                                                                                                            | Phosphoglucomutase, cytoplasmic OS=Mesembryanthemum crystallinum OX=3544 GN=PGM1 PE=2 SV=1                                                        | -1.607 |
| Cs7g14430       | K00121 1.7e-106 cit:102622247 K00121 S-(hydroxymethyl)glutathione dehydrogenase / alcohol dehydrogenase [EC:1.1.1.284 1.1.1.1]   (RefSeq) alcohol dehydrogenase-like 2 isoform X1                                                      | CYP enzymes assisting alcohol dehydrogenase OS=Catharanthus roseus OX=4058 GN=CYPADH PE=1 SV=1                                                    | 1.605  |
| Cs1g20920       | K01610 1.9e-101 cit:102629129 K01610 phosphoenolpyruvate carboxykinase (ATP) [EC:4.1.1.49]   (RefSeq) phosphoenolpyruvate carboxykinase (ATP)-like                                                                                     | Phosphoenolpyruvate carboxykinase (ATP) 1 OS=Arabidopsis thaliana OX=3702 GN=PCK1 PE=1 SV=1                                                       | 1.058  |
| Cs2g17050       | K01835 1.1e-16 cic:CICLE_v10014721mg K01835 phosphoglucomutase [EC:5.4.2.2]   (RefSeq) hypothetical protein                                                                                                                            | Probable phosphoglucomutase, cytoplasmic 1 OS=Arabidopsis thaliana OX=3702 GN=At1g23190 PE=2 SV=2                                                 | -1.761 |
|                 |                                                                                                                                                                                                                                        |                                                                                                                                                   |        |

| <i>Pyruvate metabolism (cit00620; corrected P = 0.0197)</i>                     |                                                                                                                                                                                                                                        |                                                                                                                                                   |        |
|---------------------------------------------------------------------------------|----------------------------------------------------------------------------------------------------------------------------------------------------------------------------------------------------------------------------------------|---------------------------------------------------------------------------------------------------------------------------------------------------|--------|
| Cs7g13170                                                                       | K00627 2.3e-167 cit:102609118 K00627 pyruvate dehydrogenase E2 component (dihydrolipoamide acetyltransferase) [EC:2.3.1.12]   (RefSeq) dihydrolipoamide acetyltransferase component 4 of pyruvate dehydrogenase complex, chloroplastic | Dihydrolipoamide acetyltransferase component 4 of pyruvate dehydrogenase complex, chloroplastic OS=Arabidopsis thaliana OX=3702 GN=LTA2 PE=2 SV=1 | -1.118 |
| Cs7g25390                                                                       | K00026 1.5e-53 cit:CICLE_v10008562mg K00026 malate dehydrogenase [EC:1.1.1.37]   (RefSeq) hypothetical protein                                                                                                                         | Malate dehydrogenase, mitochondrial OS=Citrullus lanatus OX=3654 GN=MMDH PE=1 SV=1                                                                | -1.555 |
| Cs3g19820                                                                       | K00128 2.9e-44 cit:102611460 K00128 aldehyde dehydrogenase (NAD+) [EC:1.2.1.3]   (RefSeq) aldehyde dehydrogenase family 3 member H1                                                                                                    | Aldehyde dehydrogenase family 3 member H1 OS=Arabidopsis thaliana OX=3702 GN=ALDH3H1 PE=1 SV=2                                                    | -1.055 |
| Cs9g02530                                                                       | K01913 1.0e-266 cit:CICLE_v10004645mg K01913 acetate/butyrate---CoA ligase [EC:6.2.1.1 6.2.1.2]   (RefSeq) hypothetical protein                                                                                                        | Acetate/butyrate--CoA ligase AAE7, peroxisomal OS=Arabidopsis thaliana OX=3702 GN=AAE7 PE=1 SV=1                                                  | -1.210 |
| Cs2g15520                                                                       | K01595 6.0e-206 cit:102607204 K01595 phosphoenolpyruvate carboxylase [EC:4.1.1.31]   (RefSeq) phosphoenolpyruvate carboxylase 2                                                                                                        | Phosphoenolpyruvate carboxylase 1 OS=Arabidopsis thaliana OX=3702 GN=PPC1 PE=1 SV=1                                                               | -2.477 |
| Cs9g01670                                                                       | K00382 3.8e-234 cit:102627107 K00382 dihydrolipoamide dehydrogenase [EC:1.8.1.4]   (RefSeq) dihydrolipoamide dehydrogenase 1, mitochondrial isoform X1                                                                                 | Dihydrolipoamide dehydrogenase 1, mitochondrial OS=Arabidopsis thaliana OX=3702 GN=LPD1 PE=1 SV=2                                                 | -2.754 |
| Cs5g10730                                                                       | K00026 2.1e-223 cit:102628532 K00026 malate dehydrogenase [EC:1.1.1.37]   (RefSeq) malate dehydrogenase, chloroplastic                                                                                                                 | Malate dehydrogenase, chloroplastic OS=Arabidopsis thaliana OX=3702 GN=At3g47520 PE=1 SV=1                                                        | -1.256 |
| Cs1g20920                                                                       | K01610 1.9e-101 cit:102629129 K01610 phosphoenolpyruvate carboxykinase (ATP) [EC:4.1.1.49]   (RefSeq) phosphoenolpyruvate carboxykinase (ATP)-like                                                                                     | Phosphoenolpyruvate carboxykinase (ATP) 1 OS=Arabidopsis thaliana OX=3702 GN=PCK1 PE=1 SV=1                                                       | 1.058  |
|                                                                                 |                                                                                                                                                                                                                                        |                                                                                                                                                   |        |
| <i>Glyoxylate and dicarboxylate metabolism (cit00630; corrected P = 0.0213)</i> |                                                                                                                                                                                                                                        |                                                                                                                                                   |        |
| Cs7g25390                                                                       | K00026 1.5e-53 cit:CICLE_v10008562mg K00026 malate dehydrogenase [EC:1.1.1.37]   (RefSeq) hypothetical protein                                                                                                                         | Malate dehydrogenase, mitochondrial OS=Citrullus lanatus OX=3654 GN=MMDH PE=1 SV=1                                                                | -1.555 |
| Cs2g02890                                                                       | K00605 5.7e-118 cit:CICLE_v10015433mg K00605 aminomethyltransferase [EC:2.1.2.10]   (RefSeq) hypothetical protein                                                                                                                      | Aminomethyltransferase, mitochondrial OS=Solanum tuberosum OX=4113 GN=GDCST PE=2 SV=1                                                             | -1.910 |
| Cs4g18520                                                                       | K00281 5.5e-312 cit:102627653 K00281 glycine dehydrogenase [EC:1.4.4.2]   (RefSeq) glycine dehydrogenase (decarboxylating), mitochondrial                                                                                              | Glycine dehydrogenase (decarboxylating) A, mitochondrial OS=Flaveria pringlei OX=4226 GN=GDCSPA PE=2 SV=1                                         | -1.292 |

|                                                                   |                                                                                                                                                                                                                                                   |                                                                                                                                                              |        |
|-------------------------------------------------------------------|---------------------------------------------------------------------------------------------------------------------------------------------------------------------------------------------------------------------------------------------------|--------------------------------------------------------------------------------------------------------------------------------------------------------------|--------|
| Cs9g02530                                                         | K01913 1.0e-266 cic:CICLE_v10004645mg K01913 acetate/butyrate---CoA ligase [EC:6.2.1.1 6.2.1.2]   (RefSeq) hypothetical protein                                                                                                                   | Acetate/butyrate--CoA ligase AAE7, peroxisomal OS=Arabidopsis thaliana OX=3702 GN=AAE7 PE=1 SV=1                                                             | -1.210 |
| Cs9g01670                                                         | K00382 3.8e-234 cit:102627107 K00382 dihydrolipoamide dehydrogenase [EC:1.8.1.4]   (RefSeq) dihydrolipoyl dehydrogenase 1, mitochondrial isoform X1                                                                                               | Dihydrolipoyl dehydrogenase 1, mitochondrial OS=Arabidopsis thaliana OX=3702 GN=LPD1 PE=1 SV=2                                                               | -2.754 |
| Cs9g05680                                                         | K01915 7.0e-71 cic:CICLE_v10005007mg K01915 glutamine synthetase [EC:6.3.1.2]   (RefSeq) hypothetical protein                                                                                                                                     | Glutamine synthetase, chloroplastic OS=Daucus carota OX=4039 GN=GLN2 PE=2 SV=1                                                                               | -1.445 |
| Cs5g10730                                                         | K00026 2.1e-223 cit:102628532 K00026 malate dehydrogenase [EC:1.1.1.37]   (RefSeq) malate dehydrogenase, chloroplastic                                                                                                                            | Malate dehydrogenase, chloroplastic OS=Arabidopsis thaliana OX=3702 GN=At3g47520 PE=1 SV=1                                                                   | -1.256 |
| <b>Citrate cycle (TCA cycle) (cit00020; corrected P = 0.0681)</b> |                                                                                                                                                                                                                                                   |                                                                                                                                                              |        |
| Cs7g25390                                                         | K00026 1.5e-53 cic:CICLE_v10008562mg K00026 malate dehydrogenase [EC:1.1.1.37]   (RefSeq) hypothetical protein                                                                                                                                    | Malate dehydrogenase, mitochondrial OS=Citrullus lanatus OX=3654 GN=MMDH PE=1 SV=1                                                                           | -1.555 |
| Cs7g13170                                                         | K00627 2.3e-167 cit:102609118 K00627 pyruvate dehydrogenase E2 component (dihydrolipoamide acetyltransferase) [EC:2.3.1.12]   (RefSeq) dihydrolipoyllysine-residue acetyltransferase component 4 of pyruvate dehydrogenase complex, chloroplastic | Dihydrolipoyllysine-residue acetyltransferase component 4 of pyruvate dehydrogenase complex, chloroplastic OS=Arabidopsis thaliana OX=3702 GN=LTA2 PE=2 SV=1 | -1.118 |
| Cs5g10730                                                         | K00026 2.1e-223 cit:102628532 K00026 malate dehydrogenase [EC:1.1.1.37]   (RefSeq) malate dehydrogenase, chloroplastic                                                                                                                            | Malate dehydrogenase, chloroplastic OS=Arabidopsis thaliana OX=3702 GN=At3g47520 PE=1 SV=1                                                                   | -1.256 |
| Cs1g20920                                                         | K01610 1.9e-101 cit:102629129 K01610 phosphoenolpyruvate carboxykinase (ATP) [EC:4.1.1.49]   (RefSeq) phosphoenolpyruvate carboxykinase (ATP)-like                                                                                                | Phosphoenolpyruvate carboxykinase (ATP) 1 OS=Arabidopsis thaliana OX=3702 GN=PCK1 PE=1 SV=1                                                                  | 1.058  |
| Cs9g01670                                                         | K00382 3.8e-234 cit:102627107 K00382 dihydrolipoamide dehydrogenase [EC:1.8.1.4]   (RefSeq) dihydrolipoyl dehydrogenase 1, mitochondrial isoform X1                                                                                               | Dihydrolipoyl dehydrogenase 1, mitochondrial OS=Arabidopsis thaliana OX=3702 GN=LPD1 PE=1 SV=2                                                               | -2.754 |
| <b>Oxidative phosphorylation (cit00190; corrected P = 0.6344)</b> |                                                                                                                                                                                                                                                   |                                                                                                                                                              |        |
| Cs5g16400                                                         | K03934 1.5e-188 cit:102610171 K03934 NADH dehydrogenase (ubiquinone) Fe-S protein 1 [EC:7.1.1.2]   (RefSeq) NADH dehydrogenase [ubiquinone] iron-sulfur protein 1, mitochondrial                                                                  | NADH dehydrogenase [ubiquinone] iron-sulfur protein 1, mitochondrial OS=Solanum tuberosum OX=4113 PE=2 SV=1                                                  | -1.047 |
| Cs2g03080                                                         | K02115 4.3e-195 cit:102629991 K02115 F-type H+-transporting ATPase subunit gamma   (RefSeq) ATP synthase gamma chain, chloroplastic                                                                                                               | ATP synthase gamma chain, chloroplastic OS=Nicotiana tabacum OX=4097 GN=ATPC PE=1 SV=1                                                                       | -1.309 |

|                                                                                         |                                                                                                                                                               |                                                                                                                     |        |
|-----------------------------------------------------------------------------------------|---------------------------------------------------------------------------------------------------------------------------------------------------------------|---------------------------------------------------------------------------------------------------------------------|--------|
| Cs7g07300                                                                               | K01535 0.0e+00 cit:102629401 K01535 H <sup>+</sup> -transporting ATPase [EC:7.1.2.1]   (RefSeq) plasma membrane ATPase-like                                   | Plasma membrane ATPase OS= <i>Oryza sativa</i> subsp. japonica OX=39947 GN=Os04g0656100 PE=2 SV=1                   | -1.156 |
| Cs6g05740                                                                               | K01507 2.3e-39 cic:CICLE_v10012723mg K01507 inorganic pyrophosphatase [EC:3.6.1.1]   (RefSeq) hypothetical protein                                            | Soluble inorganic pyrophosphatase 4 OS= <i>Arabidopsis thaliana</i> OX=3702 GN=PPA4 PE=1 SV=1                       | 1.164  |
| Cs4g07830                                                                               | K02259 2.5e-61 cit:102630339 K02259 cytochrome c oxidase assembly protein subunit 15   (RefSeq) cytochrome c oxidase assembly protein COX15                   | Cytochrome c oxidase assembly protein COX15 OS= <i>Arabidopsis thaliana</i> OX=3702 GN=COX15 PE=2 SV=1              | -1.542 |
| <i>ATP biosynthetic process (GO:0006754; adjusted P = 0.8922)</i>                       |                                                                                                                                                               |                                                                                                                     |        |
| Cs2g03080                                                                               | K02115 4.3e-195 cit:102629991 K02115 F-type H <sup>+</sup> -transporting ATPase subunit gamma   (RefSeq) ATP synthase gamma chain, chloroplastic              | ATP synthase gamma chain, chloroplastic OS= <i>Nicotiana tabacum</i> OX=4097 GN=ATPC PE=1 SV=1                      | -1.309 |
| <i>ATP generation from ADP (GO:0006757; adjusted P = 0.9342)</i>                        |                                                                                                                                                               |                                                                                                                     |        |
| orange1.1t03280                                                                         | K00927 9.7e-74 cic:CICLE_v10004891mg K00927 phosphoglycerate kinase [EC:2.7.2.3]   (RefSeq) hypothetical protein                                              | Phosphoglycerate kinase, chloroplastic OS= <i>Nicotiana tabacum</i> OX=4097 PE=2 SV=1                               | -1.999 |
| <i>Generation of precursor metabolites and energy (GO:0006091; adjusted P = 0.0185)</i> |                                                                                                                                                               |                                                                                                                     |        |
| Cs1g18810                                                                               | K02706 3.6e-50 ini:29082209 K02706 photosystem II P680 reaction center D2 protein [EC:1.10.3.9]   (RefSeq) psbD, IPN_cp071; photosystem II protein D2         | Photosystem II D2 protein OS= <i>Cuscuta exaltata</i> OX=476139 GN=psbD PE=3 SV=1                                   | -1.726 |
| Cs1g23450                                                                               | K02716 2.8e-165 cic:CICLE_v10026034mg K02716 photosystem II oxygen-evolving enhancer protein 1   (RefSeq) hypothetical protein                                | Oxygen-evolving enhancer protein 1, chloroplastic OS= <i>Nicotiana tabacum</i> OX=4097 GN=PSBO PE=2 SV=1            | -1.142 |
| Cs1g25510                                                                               | K02641 5.8e-47 cic:CICLE_v10027108mg K02641 ferredoxin--NADP+ reductase [EC:1.18.1.2]   (RefSeq) hypothetical protein                                         | Ferredoxin--NADP reductase, leaf-type isozyme, chloroplastic OS= <i>Nicotiana tabacum</i> OX=4097 GN=PETH PE=2 SV=1 | -1.068 |
| Cs2g09070                                                                               | K02703 1.7e-97 aly:32283147 K02703 photosystem II P680 reaction center D1 protein [EC:1.10.3.9]   (RefSeq) psbA, B9N47_pgp099; photosystem II protein D1      | Photosystem II protein D1 OS= <i>Anthoceros angustus</i> OX=48387 GN=psbA PE=2 SV=1                                 | -2.156 |
| Cs2g15180                                                                               | K03798 3.4e-271 cit:102623114 K03798 cell division protease FtsH [EC:3.4.24.-]   (RefSeq) ATP-dependent zinc metalloprotease FTSH 2, chloroplastic isoform X1 | ATP-dependent zinc metalloprotease FTSH 2, chloroplastic OS= <i>Arabidopsis thaliana</i> OX=3702 GN=FTSH2 PE=1 SV=1 | -1.619 |

|                 |                                                                                                                                                                                        |                                                                                                                          |        |
|-----------------|----------------------------------------------------------------------------------------------------------------------------------------------------------------------------------------|--------------------------------------------------------------------------------------------------------------------------|--------|
| Cs2g15520       | K01595 6.0e-206 cit:102607204 K01595 phosphoenolpyruvate carboxylase [EC:4.1.1.31]   (RefSeq) phosphoenolpyruvate carboxylase 2                                                        | Phosphoenolpyruvate carboxylase 1 OS=Arabidopsis thaliana OX=3702 GN=PPC1 PE=1 SV=1                                      | -2.477 |
| Cs3g06200       | K02706 1.3e-87 aly:32283168 K02706 photosystem II P680 reaction center D2 protein [EC:1.10.3.9]   (RefSeq) psbD, B9N47_pgp079; photosystem II protein D2                               | Photosystem II D2 protein OS=Acorus americanus OX=263995 GN=psbD PE=3 SV=1                                               | -1.894 |
| Cs3g27030       | K03798 3.5e-297 cit:102607431 K03798 cell division protease FtsH [EC:3.4.24.-]   (RefSeq) ATP-dependent zinc metalloprotease FTSH, chloroplastic                                       | ATP-dependent zinc metalloprotease FTSH 5, chloroplastic OS=Arabidopsis thaliana OX=3702 GN=FTSH5 PE=1 SV=1              | -1.218 |
| Cs4g07150       | K08908 9.5e-112 cit:102607051 K08908 light-harvesting complex I chlorophyll a/b binding protein 2   (RefSeq) photosystem I chlorophyll a/b-binding protein 6, chloroplastic isoform X1 | Photosystem I chlorophyll a/b-binding protein 6, chloroplastic OS=Arabidopsis thaliana OX=3702 GN=LHCA6 PE=1 SV=1        | -1.058 |
| Cs5g10730       | K00026 2.1e-223 cit:102628532 K00026 malate dehydrogenase [EC:1.1.1.37]   (RefSeq) malate dehydrogenase, chloroplastic                                                                 | Malate dehydrogenase, chloroplastic OS=Arabidopsis thaliana OX=3702 GN=At3g47520 PE=1 SV=1                               | -1.256 |
| Cs5g16400       | K03934 1.5e-188 cit:102610171 K03934 NADH dehydrogenase (ubiquinone) Fe-S protein 1 [EC:7.1.1.2]   (RefSeq) NADH dehydrogenase [ubiquinone] iron-sulfur protein 1, mitochondrial       | NADH dehydrogenase [ubiquinone] iron-sulfur protein 1, mitochondrial OS=Solanum tuberosum OX=4113 PE=2 SV=1              | -1.047 |
| Cs5g34250       |                                                                                                                                                                                        | Pentatricopeptide repeat-containing protein At2g15820, chloroplastic OS=Arabidopsis thaliana OX=3702 GN=OTP51 PE=2 SV=3  | -1.618 |
| Cs7g25390       | K00026 1.5e-53 cic:CICLE_v10008562mg K00026 malate dehydrogenase [EC:1.1.1.37]   (RefSeq) hypothetical protein                                                                         | Malate dehydrogenase, mitochondrial OS=Citrullus lanatus OX=3654 GN=MMDH PE=1 SV=1                                       | -1.555 |
| Cs7g31190       | K08915 5.5e-137 cic:CICLE_v10032377mg K08915 light-harvesting complex II chlorophyll a/b binding protein 4   (RefSeq) hypothetical protein                                             | Chlorophyll a-b binding protein CP29.3, chloroplastic OS=Arabidopsis thaliana OX=3702 GN=LHCB4.3 PE=2 SV=1               | -1.018 |
| Cs9g06360       | K00975 2.1e-69 cic:CICLE_v10004731mg K00975 glucose-1-phosphate adenylyltransferase [EC:2.7.7.27]   (RefSeq) hypothetical protein                                                      | Glucose-1-phosphate adenylyltransferase large subunit 1, chloroplastic OS=Arabidopsis thaliana OX=3702 GN=ADG2 PE=1 SV=3 | -1.206 |
| orange1.1t03280 | K00927 9.7e-74 cic:CICLE_v10004891mg K00927 phosphoglycerate kinase [EC:2.7.2.3]   (RefSeq) hypothetical protein                                                                       | Phosphoglycerate kinase, chloroplastic OS=Nicotiana tabacum OX=4097 PE=2 SV=1                                            | -1.999 |
| orange1.1t06026 | K03881 4.1e-45 bvg:809503 K03881 NADH-ubiquinone oxidoreductase chain 4 [EC:7.1.1.2]   (RefSeq) nad4, BevupMp106; NADH dehydrogenase subunit 4                                         | NADH-ubiquinone oxidoreductase chain 4 OS=Arabidopsis thaliana OX=3702 GN=ND4 PE=2 SV=2                                  | 2.075  |

|                                                                                              |                                                                                                                                                                                  |                                                                                                                          |        |
|----------------------------------------------------------------------------------------------|----------------------------------------------------------------------------------------------------------------------------------------------------------------------------------|--------------------------------------------------------------------------------------------------------------------------|--------|
|                                                                                              |                                                                                                                                                                                  |                                                                                                                          |        |
| <b>Energy derivation by oxidation of organic compounds (GO:0015980; adjusted P = 0.3682)</b> |                                                                                                                                                                                  |                                                                                                                          |        |
| Cs2g15520                                                                                    | K01595 6.0e-206 cit:102607204 K01595 phosphoenolpyruvate carboxylase [EC:4.1.1.31]   (RefSeq) phosphoenolpyruvate carboxylase 2                                                  | Phosphoenolpyruvate carboxylase 1 OS=Arabidopsis thaliana OX=3702 GN=PPC1 PE=1 SV=1                                      | -2.477 |
| Cs5g10730                                                                                    | K00026 2.1e-223 cit:102628532 K00026 malate dehydrogenase [EC:1.1.1.37]   (RefSeq) malate dehydrogenase, chloroplastic                                                           | Malate dehydrogenase, chloroplastic OS=Arabidopsis thaliana OX=3702 GN=At3g47520 PE=1 SV=1                               | -1.256 |
| Cs5g16400                                                                                    | K03934 1.5e-188 cit:102610171 K03934 NADH dehydrogenase (ubiquinone) Fe-S protein 1 [EC:7.1.1.2]   (RefSeq) NADH dehydrogenase [ubiquinone] iron-sulfur protein 1, mitochondrial | NADH dehydrogenase [ubiquinone] iron-sulfur protein 1, mitochondrial OS=Solanum tuberosum OX=4113 PE=2 SV=1              | -1.047 |
| Cs7g25390                                                                                    | K00026 1.5e-53 cic:CICLE_v10008562mg K00026 malate dehydrogenase [EC:1.1.1.37]   (RefSeq) hypothetical protein                                                                   | Malate dehydrogenase, mitochondrial OS=Citrullus lanatus OX=3654 GN=MMDH PE=1 SV=1                                       | -1.555 |
| Cs9g06360                                                                                    | K00975 2.1e-69 cic:CICLE_v10004731mg K00975 glucose-1-phosphate adenylyltransferase [EC:2.7.7.27]   (RefSeq) hypothetical protein                                                | Glucose-1-phosphate adenylyltransferase large subunit 1, chloroplastic OS=Arabidopsis thaliana OX=3702 GN=ADG2 PE=1 SV=3 | -1.206 |
| orange1.1t06026                                                                              | K03881 4.1e-45 bvg:809503 K03881 NADH-ubiquinone oxidoreductase chain 4 [EC:7.1.1.2]   (RefSeq) nad4, BevuMp106; NADH dehydrogenase subunit 4                                    | NADH-ubiquinone oxidoreductase chain 4 OS=Arabidopsis thaliana OX=3702 GN=ND4 PE=2 SV=2                                  | 2.075  |



**Table S9.** Differentially expressed genes (DEGs) related to nitrogen, protein and amino acid metabolisms in low pH-treated *Citrus sinensis* leaves

| Accession No.                                                                                   | KEGG_annotation                                                                                                                                               | Swissprot_annotation (NR_annotation)                                                                             | Log <sub>2</sub> (fold change) |
|-------------------------------------------------------------------------------------------------|---------------------------------------------------------------------------------------------------------------------------------------------------------------|------------------------------------------------------------------------------------------------------------------|--------------------------------|
| <b><i>Nitrogen metabolism (cit00910; corrected P = 0.0773)</i></b>                              |                                                                                                                                                               |                                                                                                                  |                                |
| Cs3g19060                                                                                       | K10534 0.0e+00 cit:102610866 K10534 nitrate reductase (NAD(P)H) [EC:1.7.1.1 1.7.1.2 1.7.1.3]   (RefSeq) nitrate reductase [NAD(P)H]-like                      | Nitrate reductase [NADH] OS=Cucurbita maxima OX=3661 PE=2 SV=1                                                   | -1.351                         |
| Cs8g05970                                                                                       | K00366 1.2e-181 cit:102616714 K00366 ferredoxin-nitrite reductase [EC:1.7.7.1]   (RefSeq) ferredoxin--nitrite reductase, chloroplastic                        | Ferredoxin--nitrite reductase, chloroplastic OS=Betula pendula OX=3505 GN=NIR1 PE=2 SV=1                         | -1.226                         |
| Cs8g10280                                                                                       | K01673 8.3e-34 cic:CICLE_v10028905mg K01673 carbonic anhydrase [EC:4.2.1.1]   (RefSeq) hypothetical protein                                                   | Beta carbonic anhydrase 5, chloroplastic OS=Arabidopsis thaliana OX=3702 GN=BCA5 PE=2 SV=1                       | 1.014                          |
| Cs9g05680                                                                                       | K01915 7.0e-71 cic:CICLE_v10005007mg K01915 glutamine synthetase [EC:6.3.1.2]   (RefSeq) hypothetical protein                                                 | Glutamine synthetase, chloroplastic OS=Daucus carota OX=4039 GN=GLN2 PE=2 SV=1                                   | -1.445                         |
| <b><i>Cellular nitrogen compound biosynthetic process (GO:0044271, adjusted P = 0.9389)</i></b> |                                                                                                                                                               |                                                                                                                  |                                |
| Cs1g06850                                                                                       | K00218 5.4e-124 cit:102614959 K00218 protochlorophyllide reductase [EC:1.3.1.33]   (RefSeq) protochlorophyllide reductase, chloroplastic                      | Protochlorophyllide reductase, chloroplastic OS=Cucumis sativus OX=3659 GN=PORA PE=2 SV=1                        | -1.307                         |
| Cs1g14970                                                                                       | K06215 3.8e-168 cit:102610004 K06215 pyridoxal 5'-phosphate synthase pdxS subunit [EC:4.3.3.6]   (RefSeq) pyridoxal 5'-phosphate synthase-like subunit PDX1.2 | Pyridoxal 5'-phosphate synthase-like subunit PDX1.2 OS=Arabidopsis thaliana OX=3702 GN=PDX12 PE=1 SV=1           | -1.362                         |
| Cs1g21370                                                                                       |                                                                                                                                                               | Basic leucine zipper 4 OS=Arabidopsis thaliana OX=3702 GN=BZIP4 PE=1 SV=1                                        | 1.240                          |
| Cs1g21640                                                                                       | K11338 2.5e-132 cit:102628941 K11338 RuvB-like protein 2 [EC:3.6.4.12]   (RefSeq) ruvB-like 2                                                                 | RuvB-like protein 1 OS=Arabidopsis thaliana OX=3702 GN=RIN1 PE=1 SV=1                                            | -1.199                         |
| Cs1g21890                                                                                       |                                                                                                                                                               | Ribonuclease III domain-containing protein RNC1, chloroplastic OS=Arabidopsis thaliana OX=3702 GN=RNC1 PE=2 SV=1 | -1.344                         |
| Cs2g03080                                                                                       | K02115 4.3e-195 cit:102629991 K02115 F-type H <sup>+</sup> -transporting ATPase subunit gamma   (RefSeq) ATP synthase gamma chain, chloroplastic              | ATP synthase gamma chain, chloroplastic OS=Nicotiana tabacum OX=4097 GN=ATPC PE=1 SV=1                           | -1.309                         |
| Cs2g05100                                                                                       | K03405 6.0e-194 cit:102620862 K03405 magnesium chelatase subunit I [EC:6.6.1.1]   (RefSeq) magnesium-chelatase subunit ChlI, chloroplastic                    | Magnesium-chelatase subunit ChlI, chloroplastic OS=Glycine max OX=3847 GN=CHLI PE=2 SV=1                         | -1.158                         |

|           |                                                                                                                                                      |                                                                                                   |        |
|-----------|------------------------------------------------------------------------------------------------------------------------------------------------------|---------------------------------------------------------------------------------------------------|--------|
| Cs2g06020 | K02888 2.2e-65 cic:CICLE_v10016378mg K02888 large subunit ribosomal protein L21   (RefSeq) hypothetical protein                                      | 50S ribosomal protein L21, mitochondrial OS=Arabidopsis thaliana OX=3702 GN=RPL21M PE=1 SV=1      | -1.240 |
| Cs2g06400 | K20043 6.5e-23 aip:107640400 K20043 clathrin coat assembly protein AP180   (RefSeq) putative clathrin assembly protein At5g35200                     | Dof zinc finger protein DOF3.4 OS=Arabidopsis thaliana OX=3702 GN=DOF3.4 PE=1 SV=2                | -2.300 |
| Cs2g07130 |                                                                                                                                                      |                                                                                                   | 1.324  |
| Cs2g13230 | K12135 9.4e-06 eus:EUTSA_v10015486mg K12135 zinc finger protein CONSTANS   (RefSeq) hypothetical protein                                             | Putative zinc finger protein At1g68190 OS=Arabidopsis thaliana OX=3702 GN=At1g68190 PE=2 SV=1     | 1.773  |
| Cs2g17040 |                                                                                                                                                      | HMG-Y-related protein A OS=Glycine max OX=3847 PE=2 SV=1                                          | -1.194 |
| Cs2g19240 | K23330 6.7e-15 mis:MICPUN_100143 K23330 leucine-zipper-like transcriptional regulator 1   (RefSeq) predicted protein                                 | Nitrile-specifier protein 2 OS=Arabidopsis thaliana OX=3702 GN=NSP2 PE=2 SV=1                     | 1.406  |
| Cs2g19360 | K08065 4.2e-74 cit:102616254 K08065 nuclear transcription Y subunit beta   (RefSeq) nuclear transcription factor Y subunit B-3                       | Nuclear transcription factor Y subunit B-2 OS=Arabidopsis thaliana OX=3702 GN=NFYB2 PE=1 SV=1     | 1.345  |
| Cs3g01350 | K00521 2.7e-68 cmos:111447866 K00521 ferric-chelate reductase [EC:1.16.1.7]   (RefSeq) ferric reduction oxidase 7, chloroplastic-like                | NAC domain-containing protein 35 OS=Arabidopsis thaliana OX=3702 GN=NAC035 PE=1 SV=2              | -1.715 |
| Cs3g15140 | K05953 7.2e-181 cit:102621359 K05953 nicotianamine synthase [EC:2.5.1.43]   (RefSeq) nicotianamine synthase                                          | Nicotianamine synthase OS=Solanum lycopersicum OX=4081 GN=CHLN PE=2 SV=1                          | -2.242 |
| Cs3g16730 | K02492 4.2e-206 cit:102624392 K02492 glutamyl-tRNA reductase [EC:1.2.1.70]   (RefSeq) glutamyl-tRNA reductase 1, chloroplastic                       | Glutamyl-tRNA reductase 1, chloroplastic OS=Cucumis sativus OX=3659 GN=HEMA1 PE=2 SV=1            | -1.277 |
| Cs3g19060 | K10534 0.0e+00 cit:102610866 K10534 nitrate reductase (NAD(P)H) [EC:1.7.1.1 1.7.1.2 1.7.1.3]   (RefSeq) nitrate reductase [NAD(P)H]-like             | Nitrate reductase [NADH] OS=Cucurbita maxima OX=3661 PE=2 SV=1                                    | -1.351 |
| Cs4g02080 | K10908 2.8e-170 cit:102620149 K10908 DNA-directed RNA polymerase, mitochondrial [EC:2.7.7.6]   (RefSeq) DNA-directed RNA polymerase 3, chloroplastic | DNA-directed RNA polymerase 3B, chloroplastic OS=Nicotiana tabacum OX=4097 GN=RPOT3-TOM PE=2 SV=2 | -1.873 |
| Cs4g07830 | K02259 2.5e-61 cit:102630339 K02259 cytochrome c oxidase assembly protein subunit 15   (RefSeq) cytochrome c oxidase assembly protein COX15          | Cytochrome c oxidase assembly protein COX15 OS=Arabidopsis thaliana OX=3702 GN=COX15 PE=2 SV=1    | -1.542 |
| Cs4g11870 |                                                                                                                                                      | Transcription factor bHLH123 OS=Arabidopsis thaliana OX=3702 GN=BHLH123 PE=1 SV=1                 | -1.838 |
| Cs4g15820 | K09419 1.2e-94 cit:102615136 K09419 heat shock transcription factor, other eukaryote   (RefSeq) heat stress transcription factor C-1                 | Heat stress transcription factor C-1 OS=Arabidopsis thaliana OX=3702 GN=HSFC1 PE=1 SV=1           | 1.861  |

|           |                                                                                                                                                                                   |                                                                                                       |        |
|-----------|-----------------------------------------------------------------------------------------------------------------------------------------------------------------------------------|-------------------------------------------------------------------------------------------------------|--------|
| Cs4g16220 | K14484 2.3e-69 cit:102628728 K14484 auxin-responsive protein IAA   (RefSeq) auxin-responsive protein IAA27 isoform X1                                                             | Auxin-responsive protein IAA8 OS=Arabidopsis thaliana OX=3702 GN=IAA8 PE=1 SV=1                       | 3.330  |
| Cs4g16260 | K02357 2.0e-148 cic:CICLE_v10007553mg K02357 elongation factor Ts   (RefSeq) hypothetical protein                                                                                 | Polyprotein of EF-Ts, chloroplastic OS=Oryza sativa subsp. indica OX=39946 GN=PETs PE=3 SV=1          | -1.927 |
| Cs5g01380 | K22382 4.2e-11 oeu:111408549 K22382 WD repeat-containing protein 26   (RefSeq) WD repeat-containing protein 26 homolog                                                            | Growth-regulating factor 8 OS=Arabidopsis thaliana OX=3702 GN=GRF8 PE=2 SV=1                          | 1.459  |
| Cs5g03510 | K01951 1.9e-120 cic:CICLE_v10019676mg K01951 GMP synthase (glutamine-hydrolysing) [EC:6.3.5.2]   (RefSeq) hypothetical protein                                                    | (Hypothetical protein CUMW_041950 [Citrus unshiu])                                                    | -1.355 |
| Cs5g05515 | K09680 2.6e-54 cit:102629945 K09680 type II pantothenate kinase [EC:2.7.1.33]   (RefSeq) pantothenate kinase 2                                                                    | Pantothenate kinase 2 OS=Arabidopsis thaliana OX=3702 GN=PANK2 PE=1 SV=2                              | -1.247 |
| Cs5g06190 | K02358 1.6e-262 cit:102625264 K02358 elongation factor Tu   (RefSeq) elongation factor Tu, chloroplastic                                                                          | Elongation factor Tu, chloroplastic OS=Glycine max OX=3847 GN=TUFA PE=3 SV=1                          | -1.437 |
| Cs5g06590 | K04498 2.2e-06 mesc:110630983 K04498 E1A/CREB-binding protein [EC:2.3.1.48]   (RefSeq) histone acetyltransferase HAC12-like isoform X1                                            | BTB/POZ and TAZ domain-containing protein 1 OS=Arabidopsis thaliana OX=3702 GN=BT1 PE=1 SV=1          | -1.874 |
| Cs5g07120 | K01940 1.1e-109 cit:102630538 K01940 argininosuccinate synthase [EC:6.3.4.5]   (RefSeq) argininosuccinate synthase, chloroplastic                                                 | Argininosuccinate synthase, chloroplastic OS=Arabidopsis thaliana OX=3702 GN=At4g24830 PE=1 SV=3      | -1.032 |
| Cs5g09330 | K02355 0.0e+00 cit:102624603 K02355 elongation factor G   (RefSeq) elongation factor G-2, chloroplastic                                                                           | Elongation factor G-2, chloroplastic OS=Glycine max OX=3847 GN=fusA2 PE=3 SV=1                        | -1.711 |
| Cs5g10740 | K10960 3.6e-141 cic:CICLE_v10020061mg K10960 geranylgeranyl diphosphate/geranylgeranyl-bacteriochlorophyllide a reductase [EC:1.3.1.83 1.3.1.111]   (RefSeq) hypothetical protein | Geranylgeranyl diphosphate reductase, chloroplastic OS=Arabidopsis thaliana OX=3702 GN=CHLP PE=1 SV=1 | -1.716 |
| Cs5g12780 | K17413 1.3e-74 cit:102631054 K17413 small subunit ribosomal protein S35   (RefSeq) uncharacterized protein LOC102631054                                                           | (Hypothetical protein CISIN_1g014729mg [Citrus sinensis])                                             | -1.352 |
| Cs5g15470 | K00521 2.4e-19 cmos:111447866 K00521 ferric-chelate reductase [EC:1.16.1.7]   (RefSeq) ferric reduction oxidase 7, chloroplastic-like                                             | NAC domain-containing protein 21/22 OS=Arabidopsis thaliana OX=3702 GN=NAC021 PE=1 SV=2               | -1.170 |
| Cs5g19690 | K11808 1.6e-06 qsu:111985940 K11808 phosphoribosylaminoimidazole carboxylase [EC:4.1.1.21]   (RefSeq) phosphoribosylaminoimidazole carboxylase, chloroplastic-like isoform X1     | (Hypothetical protein CUMW_218330 [Citrus unshiu])                                                    | -2.035 |
| Cs5g25440 |                                                                                                                                                                                   | Protein ILITYHIA OS=Arabidopsis thaliana OX=3702 GN=ILA PE=1 SV=1                                     | -1.084 |

|           |                                                                                                                                                                               |                                                                                                               |        |
|-----------|-------------------------------------------------------------------------------------------------------------------------------------------------------------------------------|---------------------------------------------------------------------------------------------------------------|--------|
| Cs5g29460 | K05941 7.2e-112 cic:CICLE_v10024202mg K05941 glutathione gamma-glutamylcysteinyltransferase [EC:2.3.2.15]   (RefSeq) hypothetical protein                                     | Glutathione gamma-glutamylcysteinyltransferase 2 OS=Lotus japonicus OX=34305 GN=PCS2 PE=2 SV=2                | 4.419  |
| Cs5g30230 | K11275 2.9e-48 cic:CICLE_v10021453mg K11275 histone H1/5   (RefSeq) hypothetical protein                                                                                      | Histone H1 OS=Euphorbia esula OX=3993 PE=2 SV=1                                                               | -2.447 |
| Cs5g32250 | K14549 6.2e-296 cic:CICLE_v10019671mg K14549 U3 small nucleolar RNA-associated protein 15   (RefSeq) hypothetical protein                                                     | Protein SLOW WALKER 1 OS=Arabidopsis thaliana OX=3702 GN=SWA1 PE=2 SV=1                                       | -1.526 |
| Cs6g04090 | K02930 1.4e-202 cic:CICLE_v10011875mg K02930 large subunit ribosomal protein L4e   (RefSeq) hypothetical protein                                                              | 60S ribosomal protein L4 OS=Prunus armeniaca OX=36596 GN=RPL4 PE=2 SV=1                                       | -1.093 |
| Cs6g10620 | K02879 1.5e-71 cic:CICLE_v10012716mg K02879 large subunit ribosomal protein L17   (RefSeq) hypothetical protein                                                               | 50S ribosomal protein L17, chloroplastic OS=Nicotiana tabacum OX=4097 GN=RPL17 PE=2 SV=1                      | -1.210 |
| Cs6g19900 | K10908 6.3e-221 cit:102622473 K10908 DNA-directed RNA polymerase, mitochondrial [EC:2.7.7.6]   (RefSeq) DNA-directed RNA polymerase 2, chloroplastic/mitochondrial isoform X1 | DNA-directed RNA polymerase 2, chloroplastic/mitochondrial OS=Nicotiana sylvestris OX=4096 GN=RPOT2 PE=2 SV=2 | -1.441 |
| Cs7g01720 | K08064 1.1e-86 cic:CICLE_v10032207mg K08064 nuclear transcription factor Y, alpha   (RefSeq) hypothetical protein                                                             | Nuclear transcription factor Y subunit A-9 OS=Arabidopsis thaliana OX=3702 GN=NFYA9 PE=1 SV=1                 | 1.178  |
| Cs7g03650 | K15032 4.2e-150 cit:102611895 K15032 mTERF domain-containing protein, mitochondrial   (RefSeq) transcription termination factor MTEF1, chloroplastic                          | Transcription termination factor MTEF1, chloroplastic OS=Arabidopsis thaliana OX=3702 GN=MTERF1 PE=2 SV=2     | -1.142 |
| Cs7g03670 | K16222 1.6e-61 csat:104740088 K16222 Dof zinc finger protein DOF5.5   (RefSeq) cyclic dof factor 1                                                                            | Cyclic dof factor 3 OS=Arabidopsis thaliana OX=3702 GN=CDF3 PE=1 SV=2                                         | 1.004  |
| Cs7g03680 |                                                                                                                                                                               | Myb-related protein 2 OS=Arabidopsis thaliana OX=3702 GN=MYR2 PE=1 SV=1                                       | 1.366  |
| Cs7g08170 |                                                                                                                                                                               | (Uncharacterized protein LOC18045706 [Citrus clementina])                                                     | -1.016 |
| Cs7g10960 | K09264 1.1e-09 cit:102618544 K09264 MADS-box transcription factor, plant   (RefSeq) MADS-box transcription factor 14-like isoform X1                                          | (Hypothetical protein CISIN_1g035665mg, partial [Citrus sinensis])                                            | 1.524  |
| Cs7g11680 | K00847 1.1e-19 egr:104449325 K00847 fructokinase [EC:2.7.1.4]   (RefSeq) probable fructokinase-7                                                                              | Fructokinase-like 2, chloroplastic OS=Arabidopsis thaliana OX=3702 GN=FLN2 PE=1 SV=2                          | -2.248 |
| Cs7g11770 |                                                                                                                                                                               | Squamosa promoter-binding-like protein 6 OS=Arabidopsis thaliana OX=3702 GN=SPL6 PE=1 SV=2                    | 1.198  |

|           |                                                                                                                                                                          |                                                                                                                          |        |
|-----------|--------------------------------------------------------------------------------------------------------------------------------------------------------------------------|--------------------------------------------------------------------------------------------------------------------------|--------|
| Cs7g12410 | K01611 9.7e-208 cit:102578065 K01611 S-adenosylmethionine decarboxylase [EC:4.1.1.50]   (RefSeq) SAMDC; S-adenosylmethionine decarboxylase                               | S-adenosylmethionine decarboxylase proenzyme OS=Nicotiana tabacum OX=4097 GN=SAMDC PE=2 SV=1                             | -1.653 |
| Cs7g13850 | K01749 3.5e-93 cic:CICLE_v10031858mg K01749 hydroxymethylbilane synthase [EC:2.5.1.61]   (RefSeq) hypothetical protein                                                   | Porphobilinogen deaminase, chloroplastic OS=Pisum sativum OX=3888 GN=HEMC PE=1 SV=1                                      | -1.414 |
| Cs7g15400 | K02988 7.3e-169 cic:CICLE_v10031158mg K02988 small subunit ribosomal protein S5   (RefSeq) hypothetical protein                                                          | (Uncharacterized protein LOC18044585 [Citrus clementina])                                                                | -1.044 |
| Cs7g16040 | K02906 2.5e-99 cic:CICLE_v10032370mg K02906 large subunit ribosomal protein L3   (RefSeq) hypothetical protein                                                           | 50S ribosomal protein L3-1, chloroplastic OS=Arabidopsis thaliana OX=3702 GN=RPL3A PE=2 SV=1                             | -1.133 |
| Cs8g01080 | K15032 7.4e-81 cit:102627586 K15032 mTERF domain-containing protein, mitochondrial   (RefSeq) transcription termination factor MTERF6, chloroplastic/mitochondrial       | Transcription termination factor MTERF6, chloroplastic/mitochondrial OS=Arabidopsis thaliana OX=3702 GN=MTERF6 PE=2 SV=1 | -1.220 |
| Cs8g01360 | K01885 8.0e-87 cit:102612397 K01885 glutamyl-tRNA synthetase [EC:6.1.1.17]   (RefSeq) glutamate--tRNA ligase, chloroplastic/mitochondrial                                | Glutamate--tRNA ligase, chloroplastic/mitochondrial OS=Arabidopsis thaliana OX=3702 GN=OVA3 PE=1 SV=1                    | -1.006 |
| Cs8g06380 | K15032 2.0e-81 cit:102629419 K15032 mTERF domain-containing protein, mitochondrial   (RefSeq) transcription termination factor MTERF2, chloroplastic                     | Transcription termination factor MTERF2, chloroplastic OS=Arabidopsis thaliana OX=3702 GN=MTERF2 PE=3 SV=1               | -1.062 |
| Cs8g07660 | K00764 7.6e-168 cit:102622004 K00764 amidophosphoribosyltransferase [EC:2.4.2.14]   (RefSeq) LOW QUALITY PROTEIN: amidophosphoribosyltransferase, chloroplastic-like     | Amidophosphoribosyltransferase 2, chloroplastic OS=Arabidopsis thaliana OX=3702 GN=ASE2 PE=1 SV=1                        | -1.418 |
| Cs8g10730 | K01880 1.3e-196 cit:102621048 K01880 glycyl-tRNA synthetase [EC:6.1.1.14]   (RefSeq) glycine--tRNA ligase, mitochondrial 1-like                                          | Glycine--tRNA ligase, mitochondrial 1 OS=Arabidopsis thaliana OX=3702 GN=At1g29880 PE=1 SV=1                             | -1.088 |
| Cs8g13200 | K11808 5.1e-73 cit:102626933 K11808 phosphoribosylaminoimidazole carboxylase [EC:4.1.1.21]   (RefSeq) phosphoribosylaminoimidazole carboxylase, chloroplastic isoform X1 | Phosphoribosylaminoimidazole carboxylase, chloroplastic (Fragment) OS=Vigna aconitifolia OX=3918 GN=PURKE PE=2 SV=1      | -1.164 |
| Cs8g20230 | K06215 4.4e-175 cic:CICLE_v10028683mg K06215 pyridoxal 5'-phosphate synthase pdxS subunit [EC:4.3.3.6]   (RefSeq) hypothetical protein                                   | Probable pyridoxal 5'-phosphate synthase subunit PDX1 OS=Hevea brasiliensis OX=3981 GN=PDX1 PE=2 SV=1                    | -1.356 |
| Cs9g03370 |                                                                                                                                                                          |                                                                                                                          | -1.201 |

|                 |                                                                                                                                                                    |                                                                                                        |        |
|-----------------|--------------------------------------------------------------------------------------------------------------------------------------------------------------------|--------------------------------------------------------------------------------------------------------|--------|
| Cs9g03750       | K14844 4.6e-96 cit:102625301 K14844 pumilio homology domain family member 6   (RefSeq) pumilio homolog 24 isoform X1                                               | Pumilio homolog 24 OS=Arabidopsis thaliana OX=3702 GN=APUM24 PE=1 SV=1                                 | -1.349 |
| Cs9g04410       | K01870 8.8e-102 cit:102618088 K01870 isoleucyl-tRNA synthetase [EC:6.1.1.5]   (RefSeq) isoleucine--tRNA ligase, chloroplastic/mitochondrial                        | Isoleucine--tRNA ligase, chloroplastic/mitochondrial OS=Arabidopsis thaliana OX=3702 GN=OVA2 PE=2 SV=1 | -1.177 |
| Cs9g04920       | K19073 8.5e-235 cit:102611623 K19073 divinyl chlorophyllide a 8-vinyl-reductase [EC:1.3.1.75]   (RefSeq) divinyl chlorophyllide a 8-vinyl-reductase, chloroplastic | Divinyl chlorophyllide a 8-vinyl-reductase, chloroplastic OS=Cucumis sativus OX=3659 GN=DVR PE=1 SV=1  | -1.624 |
| Cs9g06680       | K18787 6.3e-59 cic:CICLE_v10005374mg K18787 thermospermine synthase [EC:2.5.1.79]   (RefSeq) hypothetical protein                                                  | Thermospermine synthase ACAULIS5 OS=Arabidopsis thaliana OX=3702 GN=ACL5 PE=1 SV=1                     | 1.929  |
| Cs9g06870       | K02974 2.3e-25 cic:CICLE_v10006194mg K02974 small subunit ribosomal protein S24e   (RefSeq) hypothetical protein                                                   | 40S ribosomal protein S24-1 OS=Arabidopsis thaliana OX=3702 GN=RPS24A PE=2 SV=1                        | 1.242  |
| Cs9g07680       | K17290 1.9e-09 apro:F751_3177 K17290 oxidoreductase [EC:1.1.1.-]   (RefSeq) Oxidoreductase HTATIP2                                                                 | Early light-induced protein 1, chloroplastic OS=Arabidopsis thaliana OX=3702 GN=ELIP1 PE=1 SV=1        | -1.298 |
| Cs9g08110       | K14484 4.1e-47 cic:CICLE_v10005789mg K14484 auxin-responsive protein IAA   (RefSeq) hypothetical protein                                                           | Auxin-responsive protein IAA17 OS=Arabidopsis thaliana OX=3702 GN=IAA17 PE=1 SV=2                      | 1.138  |
| orange1.1t00409 | K02931 6.5e-73 cic:CICLE_v10021696mg K02931 large subunit ribosomal protein L5   (RefSeq) hypothetical protein                                                     | 50S ribosomal protein L5, chloroplastic OS=Arabidopsis thaliana OX=3702 GN=RPL5 PE=2 SV=1              | -1.326 |
| orange1.1t01583 |                                                                                                                                                                    | B-box zinc finger protein 22 OS=Arabidopsis thaliana OX=3702 GN=BBX22 PE=1 SV=2                        | -2.224 |
| orange1.1t01850 | K14492 5.7e-65 cit:102607514 K14492 two-component response regulator ARR-A family   (RefSeq) two-component response regulator ORR10                                | Two-component response regulator ARR9 OS=Arabidopsis thaliana OX=3702 GN=ARR9 PE=1 SV=1                | -1.171 |
| orange1.1t01948 | K02925 4.7e-182 cit:102611748 K02925 large subunit ribosomal protein L3e   (RefSeq) 60S ribosomal protein L3-2                                                     | 60S ribosomal protein L3-2 OS=Arabidopsis thaliana OX=3702 GN=ARP2 PE=2 SV=4                           | -1.227 |
| orange1.1t02555 | K22382 1.8e-13 oeu:111408549 K22382 WD repeat-containing protein 26   (RefSeq) WD repeat-containing protein 26 homolog                                             | Growth-regulating factor 1 OS=Zea mays OX=4577 GN=GRF1 PE=1 SV=1                                       | 3.369  |
| orange1.1t04239 | K03125 4.0e-74 cic:CICLE_v10004140mg K03125 transcription initiation factor TFIID subunit 1 [EC:2.3.1.48 2.7.11.1]   (RefSeq) hypothetical protein                 | Transcription initiation factor TFIID subunit 1 OS=Arabidopsis thaliana OX=3702 GN=TAF1 PE=1 SV=1      | -1.305 |
| orange1.1t04338 | K14760 8.7e-55 mcha:111015751 K14760 acyl-activating enzyme 14 [EC:6.2.1.26]   (RefSeq) 2-succinylbenzoate--CoA ligase, chloroplastic/peroxisomal isoform X1       | (Hypothetical protein CISIN_1g002828mg [Citrus sinensis])                                              | -1.144 |

|                                                                                       |                                                                                                                                                          |                                                                                                                  |        |
|---------------------------------------------------------------------------------------|----------------------------------------------------------------------------------------------------------------------------------------------------------|------------------------------------------------------------------------------------------------------------------|--------|
| orange1.1t04599                                                                       |                                                                                                                                                          | BEL1-like homeodomain protein 1 OS=Arabidopsis thaliana OX=3702 GN=BLH1 PE=1 SV=1                                | -1.131 |
| orange1.1t04817                                                                       | K02874 1.3e-29 cit:4271188 K02874 large subunit ribosomal protein L14   (RefSeq) rpl14, CisiCp058; ribosomal protein L14                                 | 50S ribosomal protein L14, chloroplastic OS=Carica papaya OX=3649 GN=rpl14 PE=3 SV=1                             | -1.143 |
|                                                                                       |                                                                                                                                                          |                                                                                                                  |        |
| <i>Cellular nitrogen compound catabolic process (GO:0044270; adjusted P = 1.0000)</i> |                                                                                                                                                          |                                                                                                                  |        |
| Cs2g18380                                                                             | K01166 7.9e-45 cit:102616155 K01166 ribonuclease T2 [EC:4.6.1.19]   (RefSeq) ribonuclease 2                                                              | Ribonuclease 2 OS=Arabidopsis thaliana OX=3702 GN=RNS2 PE=2 SV=1                                                 | 1.289  |
| Cs7g25620                                                                             | K12613 1.6e-58 cic:CICLE_v10032124mg K12613 mRNA-decapping enzyme subunit 2 [EC:3.6.1.62]   (RefSeq) hypothetical protein                                | mRNA-decapping enzyme subunit 2 OS=Arabidopsis thaliana OX=3702 GN=DCP2 PE=1 SV=1                                | 1.042  |
|                                                                                       |                                                                                                                                                          |                                                                                                                  |        |
| <i>Protein metabolic process (GO:0019538; adjusted P = 1.0000)</i>                    |                                                                                                                                                          |                                                                                                                  |        |
| Cs1g09310                                                                             | K02689 1.7e-31 aip:110272002 K02689 photosystem I P700 chlorophyll a apoprotein A1   (RefSeq) uncharacterized protein LOC110272002                       | Photosystem I P700 chlorophyll a apoprotein A1 OS=Agrostis stolonifera OX=63632 GN=psaA PE=3 SV=1                | -1.422 |
| Cs1g14893                                                                             | K24104 1.1e-35 thj:104799061 K24104 GPN-loop GTPase   (RefSeq) LOW QUALITY PROTEIN: uncharacterized protein LOC104799061                                 | Receptor-like serine/threonine-protein kinase SD1-6 OS=Arabidopsis thaliana OX=3702 GN=SD16 PE=1 SV=2            | 1.262  |
| Cs1g19910                                                                             | K14498 2.3e-88 cit:102623202 K14498 serine/threonine-protein kinase SRK2 [EC:2.7.11.1]   (RefSeq) serine/threonine-protein kinase SAPK2 isoform X1       | Serine/threonine-protein kinase SAPK2 OS=Oryza sativa subsp. indica OX=39946 GN=SAPK2 PE=2 SV=2                  | 1.270  |
| Cs1g21640                                                                             | K11338 2.5e-132 cit:102628941 K11338 RuvB-like protein 2 [EC:3.6.4.12]   (RefSeq) ruvB-like 2                                                            | RuvB-like protein 1 OS=Arabidopsis thaliana OX=3702 GN=RIN1 PE=1 SV=1                                            | -1.199 |
| Cs1g21890                                                                             |                                                                                                                                                          | Ribonuclease III domain-containing protein RNC1, chloroplastic OS=Arabidopsis thaliana OX=3702 GN=RNC1 PE=2 SV=1 | -1.344 |
| Cs2g06020                                                                             | K02888 2.2e-65 cic:CICLE_v10016378mg K02888 large subunit ribosomal protein L21   (RefSeq) hypothetical protein                                          | 50S ribosomal protein L21, mitochondrial OS=Arabidopsis thaliana OX=3702 GN=RPL21M PE=1 SV=1                     | -1.240 |
| Cs2g09030                                                                             | K10268 3.2e-99 cit:102614204 K10268 F-box and leucine-rich repeat protein 2/20   (RefSeq) F-box/LRR-repeat protein 3-like                                | F-box/LRR-repeat protein 3 OS=Arabidopsis thaliana OX=3702 GN=FBL3 PE=2 SV=1                                     | 1.752  |
| Cs2g09070                                                                             | K02703 1.7e-97 aly:32283147 K02703 photosystem II P680 reaction center D1 protein [EC:1.10.3.9]   (RefSeq) psbA, B9N47_pgp099; photosystem II protein D1 | Photosystem II protein D1 OS=Anthoceros angustus OX=48387 GN=psbA PE=2 SV=1                                      | -2.156 |

|           |                                                                                                                                                                                        |                                                                                                                             |        |
|-----------|----------------------------------------------------------------------------------------------------------------------------------------------------------------------------------------|-----------------------------------------------------------------------------------------------------------------------------|--------|
| Cs2g10550 | K01180 2.6e-27 cmax:111487562 K01180 endo-1,3(4)-beta-glucanase [EC:3.2.1.6]   (RefSeq) uncharacterized protein LOC111487562                                                           | Probable LRR receptor-like serine/threonine-protein kinase At1g56130 OS=Arabidopsis thaliana OX=3702 GN=At1g56130 PE=2 SV=2 | 1.345  |
| Cs2g10710 | K19042 7.1e-93 cit:102618190 K19042 E3 ubiquitin-protein ligase BOI and related proteins [EC:2.3.2.27]   (RefSeq) BOI-related E3 ubiquitin-protein ligase 1                            | E3 ubiquitin-protein ligase BOI OS=Arabidopsis thaliana OX=3702 GN=BOI PE=1 SV=1                                            | 1.097  |
| Cs2g15180 | K03798 3.4e-271 cit:102623114 K03798 cell division protease FtsH [EC:3.4.24.-]   (RefSeq) ATP-dependent zinc metalloprotease FTSH 2, chloroplastic isoform X1                          | ATP-dependent zinc metalloprotease FTSH 2, chloroplastic OS=Arabidopsis thaliana OX=3702 GN=FTSH2 PE=1 SV=1                 | -1.619 |
| Cs2g19040 | K16285 5.4e-88 cic:CICLE_v10017032mg K16285 RING/U-box domain-containing protein [EC:2.3.2.27]   (RefSeq) hypothetical protein                                                         | Probable E3 ubiquitin-protein ligase XERICO OS=Arabidopsis thaliana OX=3702 GN=XERICO PE=1 SV=1                             | 1.329  |
| Cs3g02720 |                                                                                                                                                                                        | (Uncharacterized protein LOC102623398 isoform X1 [Citrus sinensis])                                                         | 1.063  |
| Cs3g06200 | K02706 1.3e-87 aly:32283168 K02706 photosystem II P680 reaction center D2 protein [EC:1.10.3.9]   (RefSeq) psbD, B9N47_pgp079; photosystem II protein D2                               | Photosystem II D2 protein OS=Acorus americanus OX=263995 GN=psbD PE=3 SV=1                                                  | -1.894 |
| Cs3g15120 | K08675 7.4e-155 cit:102620332 K08675 ATP-dependent lon protease [EC:3.4.21.53]   (RefSeq) lon protease homolog 1, mitochondrial                                                        | Lon protease homolog, mitochondrial OS=Oryza sativa subsp. indica OX=39946 GN=OsI_27415 PE=2 SV=1                           | -1.117 |
| Cs3g27030 | K03798 3.5e-297 cit:102607431 K03798 cell division protease FtsH [EC:3.4.24.-]   (RefSeq) ATP-dependent zinc metalloprotease FTSH, chloroplastic                                       | ATP-dependent zinc metalloprotease FTSH 5, chloroplastic OS=Arabidopsis thaliana OX=3702 GN=FTSH5 PE=1 SV=1                 | -1.218 |
| Cs3g27250 | K21777 7.0e-46 cit:102615702 K21777 G2/mitotic-specific cyclin-B, other   (RefSeq) cyclin-B2-4                                                                                         | G2/mitotic-specific cyclin-2 (Fragment) OS=Medicago sativa OX=3879 PE=2 SV=1                                                | 1.122  |
| Cs4g06500 |                                                                                                                                                                                        | F-box only protein 13 OS=Arabidopsis thaliana OX=3702 GN=FBX13 PE=2 SV=2                                                    | -2.642 |
| Cs4g06540 | K16281 3.8e-44 jcu:105638045 K16281 RING-H2 zinc finger protein RHA1   (RefSeq) E3 ubiquitin-protein ligase ATL4                                                                       | Brassinosteroid-responsive RING protein 1 OS=Arabidopsis thaliana OX=3702 GN=BRH1 PE=2 SV=1                                 | 1.032  |
| Cs4g07150 | K08908 9.5e-112 cit:102607051 K08908 light-harvesting complex I chlorophyll a/b binding protein 2   (RefSeq) photosystem I chlorophyll a/b-binding protein 6, chloroplastic isoform X1 | Photosystem I chlorophyll a/b-binding protein 6, chloroplastic OS=Arabidopsis thaliana OX=3702 GN=LHCA6 PE=1 SV=1           | -1.058 |
| Cs4g16260 | K02357 2.0e-148 cic:CICLE_v10007553mg K02357 elongation factor Ts   (RefSeq) hypothetical protein                                                                                      | Polyprotein of EF-Ts, chloroplastic OS=Oryza sativa subsp. indica OX=39946 GN=PETs PE=3 SV=1                                | -1.927 |



|           |                                                                                                                                                                                   |                                                                                                                    |        |
|-----------|-----------------------------------------------------------------------------------------------------------------------------------------------------------------------------------|--------------------------------------------------------------------------------------------------------------------|--------|
| Cs5g06190 | K02358 1.6e-262 cit:102625264 K02358 elongation factor Tu   (RefSeq) elongation factor Tu, chloroplastic                                                                          | Elongation factor Tu, chloroplastic OS=Glycine max OX=3847 GN=TUFA PE=3 SV=1                                       | -1.437 |
| Cs5g06200 | K08867 2.2e-168 cit:102625534 K08867 WNK lysine deficient protein kinase [EC:2.7.11.1]   (RefSeq) probable serine/threonine-protein kinase WNK3 isoform X1                        | Probable serine/threonine-protein kinase WNK3 OS=Arabidopsis thaliana OX=3702 GN=WNK3 PE=2 SV=1                    | 1.028  |
| Cs5g06590 | K04498 2.2e-06 mesc:110630983 K04498 E1A/CREB-binding protein [EC:2.3.1.48]   (RefSeq) histone acetyltransferase HAC12-like isoform X1                                            | BTB/POZ and TAZ domain-containing protein 1 OS=Arabidopsis thaliana OX=3702 GN=BT1 PE=1 SV=1                       | -1.874 |
| Cs5g09330 | K02355 0.0e+00 cit:102624603 K02355 elongation factor G   (RefSeq) elongation factor G-2, chloroplastic                                                                           | Elongation factor G-2, chloroplastic OS=Glycine max OX=3847 GN=fusA2 PE=3 SV=1                                     | -1.711 |
| Cs5g12780 | K17413 1.3e-74 cit:102631054 K17413 small subunit ribosomal protein S35   (RefSeq) uncharacterized protein LOC102631054                                                           | (Hypothetical protein CISIN_1g014729mg [Citrus sinensis])                                                          | -1.352 |
| Cs5g22690 | K13430 1.6e-63 dzi:111291965 K13430 serine/threonine-protein kinase PBS1 [EC:2.7.11.1]   (RefSeq) serine/threonine-protein kinase PBL27-like isoform X1                           | Serine/threonine-protein kinase-like protein ACR4 OS=Arabidopsis thaliana OX=3702 GN=ACR4 PE=1 SV=1                | 1.450  |
| Cs5g25440 |                                                                                                                                                                                   | Protein ILITYHIA OS=Arabidopsis thaliana OX=3702 GN=ILA PE=1 SV=1                                                  | -1.084 |
| Cs6g04090 | K02930 1.4e-202 cic:CICLE_v10011875mg K02930 large subunit ribosomal protein L4e   (RefSeq) hypothetical protein                                                                  | 60S ribosomal protein L4 OS=Prunus armeniaca OX=36596 GN=RPL4 PE=2 SV=1                                            | -1.093 |
| Cs6g04920 | K14015 1.3e-184 cic:CICLE_v10011862mg K14015 nuclear protein localization protein 4 homolog   (RefSeq) hypothetical protein                                                       | NPL4-like protein 1 OS=Arabidopsis thaliana OX=3702 GN=At3g63000 PE=1 SV=1                                         | -1.010 |
| Cs6g10620 | K02879 1.5e-71 cic:CICLE_v10012716mg K02879 large subunit ribosomal protein L17   (RefSeq) hypothetical protein                                                                   | 50S ribosomal protein L17, chloroplastic OS=Nicotiana tabacum OX=4097 GN=RPL17 PE=2 SV=1                           | -1.210 |
| Cs7g08170 |                                                                                                                                                                                   | (Uncharacterized protein LOC18045706 [Citrus clementina])                                                          | -1.016 |
| Cs7g08350 | K10663 1.9e-25 sind:105167419 K10663 E3 ubiquitin-protein ligase ATL4 [EC:2.3.2.27]   (RefSeq) E3 ubiquitin-protein ligase ATL4-like                                              | RING-H2 finger protein ATL47 OS=Arabidopsis thaliana OX=3702 GN=ATL47 PE=2 SV=1                                    | 1.105  |
| Cs7g08960 |                                                                                                                                                                                   | F-box/kelch-repeat protein At1g23390 OS=Arabidopsis thaliana OX=3702 GN=At1g23390 PE=2 SV=1                        | -1.265 |
| Cs7g11140 | K03768 9.0e-42 cit:102625552 K03768 peptidyl-prolyl cis-trans isomerase B (cyclophilin B) [EC:5.2.1.8]   (RefSeq) photosynthetic NDH subunit of luminal location 5, chloroplastic | Photosynthetic NDH subunit of luminal location 5, chloroplastic OS=Arabidopsis thaliana OX=3702 GN=PNSL5 PE=1 SV=1 | -1.910 |
| Cs7g13800 | K14563 1.2e-81 cic:CICLE_v10032221mg K14563 rRNA 2'-O-methyltransferase fibrillarin [EC:2.1.1.-]   (RefSeq) hypothetical protein                                                  | rRNA 2'-O-methyltransferase fibrillarin 1 OS=Arabidopsis thaliana OX=3702 GN=FIB1 PE=1 SV=1                        | -1.182 |

|           |                                                                                                                                             |                                                                                                            |        |
|-----------|---------------------------------------------------------------------------------------------------------------------------------------------|------------------------------------------------------------------------------------------------------------|--------|
| Cs7g13850 | K01749 3.5e-93 cic:CICLE_v10031858mg K01749 hydroxymethylbilane synthase [EC:2.5.1.61]   (RefSeq) hypothetical protein                      | Porphobilinogen deaminase, chloroplastic OS=Pisum sativum OX=3888 GN=HEMC PE=1 SV=1                        | -1.414 |
| Cs7g13940 | K16297 1.8e-115 cit:102608354 K16297 serine carboxypeptidase-like clade II [EC:3.4.16.-]   (RefSeq) serine carboxypeptidase-like 35         | Serine carboxypeptidase-like 35 OS=Arabidopsis thaliana OX=3702 GN=SCPL35 PE=2 SV=1                        | 1.140  |
| Cs7g15400 | K02988 7.3e-169 cic:CICLE_v10031158mg K02988 small subunit ribosomal protein S5   (RefSeq) hypothetical protein                             | (Uncharacterized protein LOC18044585 [Citrus clementina])                                                  | -1.044 |
| Cs7g16040 | K02906 2.5e-99 cic:CICLE_v10032370mg K02906 large subunit ribosomal protein L3   (RefSeq) hypothetical protein                              | 50S ribosomal protein L3-1, chloroplastic OS=Arabidopsis thaliana OX=3702 GN=RPL3A PE=2 SV=1               | -1.133 |
| Cs7g16620 | K09571 2.4e-84 cic:CICLE_v10031088mg K09571 FK506-binding protein 4/5 [EC:5.2.1.8]   (RefSeq) hypothetical protein                          | 70 kDa peptidyl-prolyl isomerase OS=Triticum aestivum OX=4565 GN=FKBP70 PE=1 SV=1                          | -1.225 |
| Cs7g30500 | K14496 1.2e-114 cic:CICLE_v10032781mg K14496 abscisic acid receptor PYR/PYL family   (RefSeq) hypothetical protein                          | Abscisic acid receptor PYL4 OS=Arabidopsis thaliana OX=3702 GN=PYL4 PE=1 SV=1                              | -1.525 |
| Cs7g31190 | K08915 5.5e-137 cic:CICLE_v10032377mg K08915 light-harvesting complex II chlorophyll a/b binding protein 4   (RefSeq) hypothetical protein  | Chlorophyll a-b binding protein CP29.3, chloroplastic OS=Arabidopsis thaliana OX=3702 GN=LHCB4.3 PE=2 SV=1 | -1.018 |
| Cs8g01360 | K01885 8.0e-87 cit:102612397 K01885 glutamyl-tRNA synthetase [EC:6.1.1.17]   (RefSeq) glutamate--tRNA ligase, chloroplastic/mitochondrial   | Glutamate--tRNA ligase, chloroplastic/mitochondrial OS=Arabidopsis thaliana OX=3702 GN=OVA3 PE=1 SV=1      | -1.006 |
| Cs8g08320 | K01373 2.0e-115 cit:102620490 K01373 cathepsin F [EC:3.4.22.41]   (RefSeq) probable cysteine protease RD19B                                 | Cysteine protease RD19A OS=Arabidopsis thaliana OX=3702 GN=RD19A PE=1 SV=1                                 | -1.117 |
| Cs8g10730 | K01880 1.3e-196 cit:102621048 K01880 glycyl-tRNA synthetase [EC:6.1.1.14]   (RefSeq) glycine--tRNA ligase, mitochondrial 1-like             | Glycine--tRNA ligase, mitochondrial 1 OS=Arabidopsis thaliana OX=3702 GN=At1g29880 PE=1 SV=1               | -1.088 |
| Cs8g15970 | K13525 3.2e-159 cit:102612408 K13525 transitional endoplasmic reticulum ATPase   (RefSeq) cell division cycle protein 48 homolog            | Cell division cycle protein 48 homolog OS=Glycine max OX=3847 GN=CDC48 PE=2 SV=1                           | -1.028 |
| Cs9g03750 | K14844 4.6e-96 cit:102625301 K14844 pumilio homology domain family member 6   (RefSeq) pumilio homolog 24 isoform X1                        | Pumilio homolog 24 OS=Arabidopsis thaliana OX=3702 GN=APUM24 PE=1 SV=1                                     | -1.349 |
| Cs9g04410 | K01870 8.8e-102 cit:102618088 K01870 isoleucyl-tRNA synthetase [EC:6.1.1.5]   (RefSeq) isoleucine--tRNA ligase, chloroplastic/mitochondrial | Isoleucine--tRNA ligase, chloroplastic/mitochondrial OS=Arabidopsis thaliana OX=3702 GN=OVA2 PE=2 SV=1     | -1.177 |
| Cs9g06720 | K00276 1.0e-185 cic:CICLE_v10004484mg K00276 primary-amine oxidase [EC:1.4.3.21]   (RefSeq) hypothetical protein                            | Primary amine oxidase (Fragment) OS=Lens culinaris OX=3864 PE=1 SV=3                                       | -3.393 |
| Cs9g06870 | K02974 2.3e-25 cic:CICLE_v10006194mg K02974 small subunit ribosomal protein S24e   (RefSeq) hypothetical protein                            | 40S ribosomal protein S24-1 OS=Arabidopsis thaliana OX=3702 GN=RPS24A PE=2 SV=1                            | 1.242  |

|                                                                    |                                                                                                                                                                                           |                                                                                                                             |        |
|--------------------------------------------------------------------|-------------------------------------------------------------------------------------------------------------------------------------------------------------------------------------------|-----------------------------------------------------------------------------------------------------------------------------|--------|
| orange1.1t00405                                                    | K13430 2.7e-29 ccaj:109802387 K13430 serine/threonine-protein kinase PBS1 [EC:2.7.11.1]   (RefSeq) serine/threonine-protein kinase PBS1-like isoform X1                                   | Probable serine/threonine-protein kinase At1g01540 OS=Arabidopsis thaliana OX=3702 GN=At1g01540 PE=1 SV=2                   | 1.099  |
| orange1.1t00409                                                    | K02931 6.5e-73 cic:CICLE_v10021696mg K02931 large subunit ribosomal protein L5   (RefSeq) hypothetical protein                                                                            | 50S ribosomal protein L5, chloroplastic OS=Arabidopsis thaliana OX=3702 GN=RPL5 PE=2 SV=1                                   | -1.326 |
| orange1.1t00499                                                    |                                                                                                                                                                                           | (Hypothetical protein CUMW_091500 [Citrus unshiu])                                                                          | -1.481 |
| orange1.1t01687                                                    | K01358 1.5e-59 cic:CICLE_v10021318mg K01358 ATP-dependent Clp protease, protease subunit [EC:3.4.21.92]   (RefSeq) hypothetical protein                                                   | ATP-dependent Clp protease proteolytic subunit 5, chloroplastic OS=Arabidopsis thaliana OX=3702 GN=CLPP5 PE=1 SV=1          | -1.105 |
| orange1.1t01948                                                    | K02925 4.7e-182 cit:102611748 K02925 large subunit ribosomal protein L3e   (RefSeq) 60S ribosomal protein L3-2                                                                            | 60S ribosomal protein L3-2 OS=Arabidopsis thaliana OX=3702 GN=ARP2 PE=2 SV=4                                                | -1.227 |
| orange1.1t03252                                                    | K03798 1.3e-100 cic:CICLE_v10004242mg K03798 cell division protease FtsH [EC:3.4.24.-]   (RefSeq) hypothetical protein                                                                    | ATP-dependent zinc metalloprotease FTSH 12, chloroplastic OS=Arabidopsis thaliana OX=3702 GN=FTSH12 PE=2 SV=2               | -1.563 |
| orange1.1t04239                                                    | K03125 4.0e-74 cic:CICLE_v10004140mg K03125 transcription initiation factor TFIID subunit 1 [EC:2.3.1.48 2.7.11.1]   (RefSeq) hypothetical protein                                        | Transcription initiation factor TFIID subunit 1 OS=Arabidopsis thaliana OX=3702 GN=TAF1 PE=1 SV=1                           | -1.305 |
| orange1.1t04760                                                    | K13420 7.4e-110 cit:102626235 K13420 LRR receptor-like serine/threonine-protein kinase FLS2 [EC:2.7.11.1]   (RefSeq) probable LRR receptor-like serine/threonine-protein kinase At3g47570 | Probable LRR receptor-like serine/threonine-protein kinase At3g47570 OS=Arabidopsis thaliana OX=3702 GN=At3g47570 PE=2 SV=1 | 1.925  |
| orange1.1t04817                                                    | K02874 1.3e-29 cit:4271188 K02874 large subunit ribosomal protein L14   (RefSeq) rpl14, CisiCp058; ribosomal protein L14                                                                  | 50S ribosomal protein L14, chloroplastic OS=Carica papaya OX=3649 GN=rpl14 PE=3 SV=1                                        | -1.143 |
|                                                                    |                                                                                                                                                                                           |                                                                                                                             |        |
| <b>Protein catabolic process (GO:0030163; adjusted P = 0.9342)</b> |                                                                                                                                                                                           |                                                                                                                             |        |
| Cs2g09030                                                          | K10268 3.2e-99 cit:102614204 K10268 F-box and leucine-rich repeat protein 2/20   (RefSeq) F-box/LRR-repeat protein 3-like                                                                 | F-box/LRR-repeat protein 3 OS=Arabidopsis thaliana OX=3702 GN=FBL3 PE=2 SV=1                                                | 1.752  |
| Cs2g15180                                                          | K03798 3.4e-271 cit:102623114 K03798 cell division protease FtsH [EC:3.4.24.-]   (RefSeq) ATP-dependent zinc metalloprotease FTSH 2, chloroplastic isoform X1                             | ATP-dependent zinc metalloprotease FTSH 2, chloroplastic OS=Arabidopsis thaliana OX=3702 GN=FTSH2 PE=1 SV=1                 | -1.619 |
| Cs2g19040                                                          | K16285 5.4e-88 cic:CICLE_v10017032mg K16285 RING/U-box domain-containing protein [EC:2.3.2.27]   (RefSeq) hypothetical protein                                                            | Probable E3 ubiquitin-protein ligase XERICO OS=Arabidopsis thaliana OX=3702 GN=XERICO PE=1 SV=1                             | 1.329  |

|                                                                 |                                                                                                                                                             |                                                                                                                    |        |
|-----------------------------------------------------------------|-------------------------------------------------------------------------------------------------------------------------------------------------------------|--------------------------------------------------------------------------------------------------------------------|--------|
| Cs3g15120                                                       | K08675 7.4e-155 cit:102620332 K08675 ATP-dependent lon protease [EC:3.4.21.53]   (RefSeq) lon protease homolog 1, mitochondrial                             | Lon protease homolog, mitochondrial OS=Oryza sativa subsp. indica OX=39946 GN=OsI_27415 PE=2 SV=1                  | -1.117 |
| Cs3g27030                                                       | K03798 3.5e-297 cit:102607431 K03798 cell division protease FtsH [EC:3.4.24.-]   (RefSeq) ATP-dependent zinc metalloprotease FTSH, chloroplastic            | ATP-dependent zinc metalloprotease FTSH 5, chloroplastic OS=Arabidopsis thaliana OX=3702 GN=FTSH5 PE=1 SV=1        | -1.218 |
| Cs4g06500                                                       |                                                                                                                                                             | F-box only protein 13 OS=Arabidopsis thaliana OX=3702 GN=FBX13 PE=2 SV=2                                           | -2.642 |
| Cs5g06590                                                       | K04498 2.2e-06 mesc:110630983 K04498 E1A/CREB-binding protein [EC:2.3.1.48]   (RefSeq) histone acetyltransferase HAC12-like isoform X1                      | BTB/POZ and TAZ domain-containing protein 1 OS=Arabidopsis thaliana OX=3702 GN=BT1 PE=1 SV=1                       | -1.874 |
| Cs6g04920                                                       | K14015 1.3e-184 cic:CICLE_v10011862mg K14015 nuclear protein localization protein 4 homolog   (RefSeq) hypothetical protein                                 | NPL4-like protein 1 OS=Arabidopsis thaliana OX=3702 GN=At3g63000 PE=1 SV=1                                         | -1.010 |
| Cs7g08960                                                       |                                                                                                                                                             | F-box/kelch-repeat protein At1g23390 OS=Arabidopsis thaliana OX=3702 GN=At1g23390 PE=2 SV=1                        | -1.265 |
| Cs7g13940                                                       | K16297 1.8e-115 cit:102608354 K16297 serine carboxypeptidase-like clade II [EC:3.4.16.-]   (RefSeq) serine carboxypeptidase-like 35                         | Serine carboxypeptidase-like 35 OS=Arabidopsis thaliana OX=3702 GN=SCPL35 PE=2 SV=1                                | 1.140  |
| Cs8g08320                                                       | K01373 2.0e-115 cit:102620490 K01373 cathepsin F [EC:3.4.22.41]   (RefSeq) probable cysteine protease RD19B                                                 | Cysteine protease RD19A OS=Arabidopsis thaliana OX=3702 GN=RD19A PE=1 SV=1                                         | -1.117 |
| Cs8g15970                                                       | K13525 3.2e-159 cit:102612408 K13525 transitional endoplasmic reticulum ATPase   (RefSeq) cell division cycle protein 48 homolog                            | Cell division cycle protein 48 homolog OS=Glycine max OX=3847 GN=CDC48 PE=2 SV=1                                   | -1.028 |
| orange1.1t00499                                                 |                                                                                                                                                             | (Hypothetical protein CUMW_091500 [Citrus unshiu])                                                                 | -1.481 |
| orange1.1t01687                                                 | K01358 1.5e-59 cic:CICLE_v10021318mg K01358 ATP-dependent Clp protease, protease subunit [EC:3.4.21.92]   (RefSeq) hypothetical protein                     | ATP-dependent Clp protease proteolytic subunit 5, chloroplastic OS=Arabidopsis thaliana OX=3702 GN=CLPP5 PE=1 SV=1 | -1.105 |
|                                                                 |                                                                                                                                                             |                                                                                                                    |        |
| <b>Protein ubiquitination (GO:0016567; adjusted P = 1.0000)</b> |                                                                                                                                                             |                                                                                                                    |        |
| Cs2g10710                                                       | K19042 7.1e-93 cit:102618190 K19042 E3 ubiquitin-protein ligase BOI and related proteins [EC:2.3.2.27]   (RefSeq) BOI-related E3 ubiquitin-protein ligase 1 | E3 ubiquitin-protein ligase BOI OS=Arabidopsis thaliana OX=3702 GN=BOI PE=1 SV=1                                   | 1.097  |
| Cs2g19040                                                       | K16285 5.4e-88 cic:CICLE_v10017032mg K16285 RING/U-box domain-containing protein [EC:2.3.2.27]   (RefSeq) hypothetical protein                              | Probable E3 ubiquitin-protein ligase XERICO OS=Arabidopsis thaliana OX=3702 GN=XERICO PE=1 SV=1                    | 1.329  |

|                                                                                                                   |                                                                                                                                        |                                                                                                 |        |
|-------------------------------------------------------------------------------------------------------------------|----------------------------------------------------------------------------------------------------------------------------------------|-------------------------------------------------------------------------------------------------|--------|
| Cs4g06500                                                                                                         |                                                                                                                                        | F-box only protein 13 OS=Arabidopsis thaliana OX=3702 GN=FBX13 PE=2 SV=2                        | -2.642 |
| Cs4g06540                                                                                                         | K16281 3.8e-44 jcu:105638045 K16281 RING-H2 zinc finger protein RHA1   (RefSeq) E3 ubiquitin-protein ligase ATL4                       | Brassinosteroid-responsive RING protein 1 OS=Arabidopsis thaliana OX=3702 GN=BRH1 PE=2 SV=1     | 1.032  |
| Cs7g08350                                                                                                         | K10663 1.9e-25 sind:105167419 K10663 E3 ubiquitin-protein ligase ATL4 [EC:2.3.2.27]   (RefSeq) E3 ubiquitin-protein ligase ATL4-like   | RING-H2 finger protein ATL47 OS=Arabidopsis thaliana OX=3702 GN=ATL47 PE=2 SV=1                 | 1.105  |
|                                                                                                                   |                                                                                                                                        |                                                                                                 |        |
| <b><i>Proteasome-mediated ubiquitin-dependent protein catabolic process (GO:0043161; adjusted P = 0.9970)</i></b> |                                                                                                                                        |                                                                                                 |        |
| Cs2g09030                                                                                                         | K10268 3.2e-99 cit:102614204 K10268 F-box and leucine-rich repeat protein 2/20   (RefSeq) F-box/LRR-repeat protein 3-like              | F-box/LRR-repeat protein 3 OS=Arabidopsis thaliana OX=3702 GN=FBL3 PE=2 SV=1                    | 1.752  |
| Cs2g19040                                                                                                         | K16285 5.4e-88 cic:CICLE_v10017032mg K16285 RING/U-box domain-containing protein [EC:2.3.2.27]   (RefSeq) hypothetical protein         | Probable E3 ubiquitin-protein ligase XERICO OS=Arabidopsis thaliana OX=3702 GN=XERICO PE=1 SV=1 | 1.329  |
| Cs4g06500                                                                                                         |                                                                                                                                        | F-box only protein 13 OS=Arabidopsis thaliana OX=3702 GN=FBX13 PE=2 SV=2                        | -2.642 |
| Cs5g06590                                                                                                         | K04498 2.2e-06 mesc:110630983 K04498 E1A/CREB-binding protein [EC:2.3.1.48]   (RefSeq) histone acetyltransferase HAC12-like isoform X1 | BTB/POZ and TAZ domain-containing protein 1 OS=Arabidopsis thaliana OX=3702 GN=BT1 PE=1 SV=1    | -1.874 |
| Cs7g08960                                                                                                         |                                                                                                                                        | F-box/kelch-repeat protein At1g23390 OS=Arabidopsis thaliana OX=3702 GN=At1g23390 PE=2 SV=1     | -1.265 |
|                                                                                                                   |                                                                                                                                        |                                                                                                 |        |
| <b><i>Ubiquitin-dependent protein catabolic process (GO:0006511; adjusted P = 1.0000)</i></b>                     |                                                                                                                                        |                                                                                                 |        |
| Cs2g09030                                                                                                         | K10268 3.2e-99 cit:102614204 K10268 F-box and leucine-rich repeat protein 2/20   (RefSeq) F-box/LRR-repeat protein 3-like              | F-box/LRR-repeat protein 3 OS=Arabidopsis thaliana OX=3702 GN=FBL3 PE=2 SV=1                    | 1.752  |
| Cs2g19040                                                                                                         | K16285 5.4e-88 cic:CICLE_v10017032mg K16285 RING/U-box domain-containing protein [EC:2.3.2.27]   (RefSeq) hypothetical protein         | Probable E3 ubiquitin-protein ligase XERICO OS=Arabidopsis thaliana OX=3702 GN=XERICO PE=1 SV=1 | 1.329  |
| Cs4g06500                                                                                                         |                                                                                                                                        | F-box only protein 13 OS=Arabidopsis thaliana OX=3702 GN=FBX13 PE=2 SV=2                        | -2.642 |
| Cs5g06590                                                                                                         | K04498 2.2e-06 mesc:110630983 K04498 E1A/CREB-binding protein [EC:2.3.1.48]   (RefSeq) histone acetyltransferase HAC12-like isoform X1 | BTB/POZ and TAZ domain-containing protein 1 OS=Arabidopsis thaliana OX=3702 GN=BT1 PE=1 SV=1    | -1.874 |

|                                                                    |                                                                                                                                                                                           |                                                                                                                             |        |
|--------------------------------------------------------------------|-------------------------------------------------------------------------------------------------------------------------------------------------------------------------------------------|-----------------------------------------------------------------------------------------------------------------------------|--------|
| Cs6g04920                                                          | K14015 1.3e-184 cic:CICLE_v10011862mg K14015 nuclear protein localization protein 4 homolog   (RefSeq) hypothetical protein                                                               | NPL4-like protein 1 OS=Arabidopsis thaliana OX=3702 GN=At3g63000 PE=1 SV=1                                                  | -1.010 |
| Cs7g08960                                                          |                                                                                                                                                                                           | F-box/kelch-repeat protein At1g23390 OS=Arabidopsis thaliana OX=3702 GN=At1g23390 PE=2 SV=1                                 | -1.265 |
| orange1.1t00499                                                    |                                                                                                                                                                                           | (Hypothetical protein CUMW_091500 [Citrus unshiu])                                                                          | -1.481 |
| <b>Protein phosphorylation (GO:0006468, adjusted P = 1.0000)</b>   |                                                                                                                                                                                           |                                                                                                                             |        |
| Cs1g14893                                                          | K24104 1.1e-35 thj:104799061 K24104 GPN-loop GTPase   (RefSeq) LOW QUALITY PROTEIN: uncharacterized protein LOC104799061                                                                  | Receptor-like serine/threonine-protein kinase SD1-6 OS=Arabidopsis thaliana OX=3702 GN=SD16 PE=1 SV=2                       | 1.262  |
| Cs1g19910                                                          | K14498 2.3e-88 cit:102623202 K14498 serine/threonine-protein kinase SRK2 [EC:2.7.11.1]   (RefSeq) serine/threonine-protein kinase SAPK2 isoform X1                                        | Serine/threonine-protein kinase SAPK2 OS=Oryza sativa subsp. indica OX=39946 GN=SAPK2 PE=2 SV=2                             | 1.270  |
| Cs2g10550                                                          | K01180 2.6e-27 cmax:111487562 K01180 endo-1,3(4)-beta-glucanase [EC:3.2.1.6]   (RefSeq) uncharacterized protein LOC111487562                                                              | Probable LRR receptor-like serine/threonine-protein kinase At1g56130 OS=Arabidopsis thaliana OX=3702 GN=At1g56130 PE=2 SV=2 | 1.345  |
| Cs3g27250                                                          | K21777 7.0e-46 cit:102615702 K21777 G2/mitotic-specific cyclin-B, other   (RefSeq) cyclin-B2-4                                                                                            | G2/mitotic-specific cyclin-2 (Fragment) OS=Medicago sativa OX=3879 PE=2 SV=1                                                | 1.122  |
| Cs5g06200                                                          | K08867 2.2e-168 cit:102625534 K08867 WNK lysine deficient protein kinase [EC:2.7.11.1]   (RefSeq) probable serine/threonine-protein kinase WNK3 isoform X1                                | Probable serine/threonine-protein kinase WNK3 OS=Arabidopsis thaliana OX=3702 GN=WNK3 PE=2 SV=1                             | 1.028  |
| Cs5g22690                                                          | K13430 1.6e-63 dzi:111291965 K13430 serine/threonine-protein kinase PBS1 [EC:2.7.11.1]   (RefSeq) serine/threonine-protein kinase PBL27-like isoform X1                                   | Serine/threonine-protein kinase-like protein ACR4 OS=Arabidopsis thaliana OX=3702 GN=ACR4 PE=1 SV=1                         | 1.450  |
| Cs9g06720                                                          | K00276 1.0e-185 cic:CICLE_v10004484mg K00276 primary-amine oxidase [EC:1.4.3.21]   (RefSeq) hypothetical protein                                                                          | Primary amine oxidase (Fragment) OS=Lens culinaris OX=3864 PE=1 SV=3                                                        | -3.393 |
| orange1.1t00405                                                    | K13430 2.7e-29 ccaj:109802387 K13430 serine/threonine-protein kinase PBS1 [EC:2.7.11.1]   (RefSeq) serine/threonine-protein kinase PBS1-like isoform X1                                   | Probable serine/threonine-protein kinase At1g01540 OS=Arabidopsis thaliana OX=3702 GN=At1g01540 PE=1 SV=2                   | 1.099  |
| orange1.1t04760                                                    | K13420 7.4e-110 cit:102626235 K13420 LRR receptor-like serine/threonine-protein kinase FLS2 [EC:2.7.11.1]   (RefSeq) probable LRR receptor-like serine/threonine-protein kinase At3g47570 | Probable LRR receptor-like serine/threonine-protein kinase At3g47570 OS=Arabidopsis thaliana OX=3702 GN=At3g47570 PE=2 SV=1 | 1.925  |
| <b>Protein dephosphorylation (GO:0006470; adjusted P = 1.0000)</b> |                                                                                                                                                                                           |                                                                                                                             |        |

|                                                                                     |                                                                                                                                  |                                                                                                  |        |
|-------------------------------------------------------------------------------------|----------------------------------------------------------------------------------------------------------------------------------|--------------------------------------------------------------------------------------------------|--------|
| Cs7g30500                                                                           | K14496 1.2e-114 cit:CICLE_v10032781mg K14496 abscisic acid receptor PYR/PYL family   (RefSeq) hypothetical protein               | Absciscic acid receptor PYL4 OS=Arabidopsis thaliana OX=3702 GN=PYL4 PE=1 SV=1                   | -1.525 |
| <i>Protein processing in endoplasmic reticulum (cit04141; corrected P = 0.0066)</i> |                                                                                                                                  |                                                                                                  |        |
| Cs7g32260                                                                           | K13993 1.1e-81 cit:102617602 K13993 HSP20 family protein   (RefSeq) 18.1 kDa class I heat shock protein-like                     | 18.2 kDa class I heat shock protein OS=Medicago sativa OX=3879 GN=HSP18.2 PE=2 SV=1              | 1.504  |
| Cs7g10040                                                                           | K13993 9.2e-84 cit:102610711 K13993 HSP20 family protein   (RefSeq) small heat shock protein, chloroplastic-like                 | Heat shock protein 21, chloroplastic OS=Arabidopsis thaliana OX=3702 GN=HSP21 PE=1 SV=1          | -1.139 |
| orange1.1t01933                                                                     | K03283 3.9e-138 cit:112495491 K03283 heat shock 70kDa protein 1/2/6/8   (RefSeq) heat shock 70 kDa protein 6, chloroplastic      | Heat shock 70 kDa protein 6, chloroplastic OS=Arabidopsis thaliana OX=3702 GN=HSP70-6 PE=1 SV=1  | -1.589 |
| Cs8g18240                                                                           | K03283 3.2e-35 cit:CICLE_v10028007mg K03283 heat shock 70kDa protein 1/2/6/8   (RefSeq) hypothetical protein                     | Heat shock 70 kDa protein 4 OS=Arabidopsis thaliana OX=3702 GN=HSP70-4 PE=1 SV=1                 | -1.128 |
| Cs7g28940                                                                           | K03283 0.0e+00 cit:CICLE_v10033622mg K03283 heat shock 70kDa protein 1/2/6/8   (RefSeq) hypothetical protein                     | Heat shock cognate 70 kDa protein OS=Petunia hybrida OX=4102 GN=HSP70 PE=2 SV=1                  | -1.727 |
| Cs8g19520                                                                           | K13993 1.1e-86 cit:CICLE_v10029437mg K13993 HSP20 family protein   (RefSeq) hypothetical protein                                 | 18.2 kDa class I heat shock protein OS=Medicago sativa OX=3879 GN=HSP18.2 PE=2 SV=1              | -2.519 |
| Cs2g24360                                                                           | K13993 2.8e-85 cit:CICLE_v10016547mg K13993 HSP20 family protein   (RefSeq) hypothetical protein                                 | K13993 2.8e-85 cit:CICLE_v10016547mg K13993 HSP20 family protein   (RefSeq) hypothetical protein | -2.930 |
| Cs7g23510                                                                           | K09503 6.0e-81 tcc:18586851 K09503 DnaJ homolog subfamily A member 2   (RefSeq) dnaJ protein homolog                             | DnaJ protein homolog ANJ1 OS=Atriplex nummularia OX=3553 PE=2 SV=1                               | 1.258  |
| Cs4g08220                                                                           | K04079 0.0e+00 cit:CICLE_v10007633mg K04079 molecular chaperone HtpG   (RefSeq) hypothetical protein                             | Heat shock cognate protein 80 OS=Solanum lycopersicum OX=4081 GN=HSC80 PE=2 SV=1                 | -1.286 |
| Cs2g23310                                                                           | K06689 3.8e-21 boe:106307910 K06689 ubiquitin-conjugating enzyme E2 D [EC:2.3.2.23]   (RefSeq) SUMO-conjugating enzyme UBC9      | SUMO-conjugating enzyme UBC9 OS=Arabidopsis thaliana OX=3702 GN=UBC9 PE=1 SV=1                   | 1.048  |
| Cs5g03150                                                                           | K04079 7.1e-271 cit:102616579 K04079 molecular chaperone HtpG   (RefSeq) heat shock protein 83-like                              | Heat shock protein 83 OS=Ipomoea nil OX=35883 GN=HSP83A PE=2 SV=1                                | -1.705 |
| Cs8g15970                                                                           | K13525 3.2e-159 cit:102612408 K13525 transitional endoplasmic reticulum ATPase   (RefSeq) cell division cycle protein 48 homolog | Cell division cycle protein 48 homolog OS=Glycine max OX=3847 GN=CDC48 PE=2 SV=1                 | -1.028 |
| Cs9g19220                                                                           | K04079 5.5e-274 cit:CICLE_v10004456mg K04079 molecular chaperone HtpG   (RefSeq) hypothetical protein                            | Heat shock protein 83 OS=Ipomoea nil OX=35883 GN=HSP83A PE=2 SV=1                                | -2.036 |
| Cs9g14690                                                                           | K13993 9.0e-71 cit:102631003 K13993 HSP20 family protein   (RefSeq) heat shock 22 kDa protein, mitochondrial                     | Heat shock 22 kDa protein, mitochondrial OS=Pisum sativum OX=3888 GN=HSP22 PE=2 SV=1             | -1.931 |

|                                                          |                                                                                                                                                                                   |                                                                                                                    |        |
|----------------------------------------------------------|-----------------------------------------------------------------------------------------------------------------------------------------------------------------------------------|--------------------------------------------------------------------------------------------------------------------|--------|
| Cs7g12130                                                | K09487 8.8e-81 cit:102629966 K09487 heat shock protein 90kDa beta   (RefSeq) heat shock protein 90-5, chloroplastic                                                               | Heat shock protein 90-5, chloroplastic OS=Arabidopsis thaliana OX=3702 GN=HSP90-5 PE=1 SV=1                        | -1.570 |
| Cs6g04920                                                | K14015 1.3e-184 cic:CICLE_v10011862mg K14015 nuclear protein localization protein 4 homolog   (RefSeq) hypothetical protein                                                       | NPL4-like protein 1 OS=Arabidopsis thaliana OX=3702 GN=At3g63000 PE=1 SV=1                                         | -1.010 |
|                                                          |                                                                                                                                                                                   |                                                                                                                    |        |
| <i>Protein folding (GO:0006457, adjusted P = 0.0003)</i> |                                                                                                                                                                                   |                                                                                                                    |        |
| Cs2g23125                                                |                                                                                                                                                                                   | (chaperonin CPN60, mitochondrial-like, partial [Citrus clementina])                                                | 1.327  |
| Cs2g23190                                                |                                                                                                                                                                                   | (chaperonin CPN60, mitochondrial-like isoform X4 [Citrus clementina])                                              | 1.158  |
| Cs3g04960                                                | K04043 6.4e-116 cit:102606731 K04043 molecular chaperone DnaK   (RefSeq) heat shock 70 kDa protein, mitochondrial                                                                 | Heat shock 70 kDa protein, mitochondrial OS=Phaseolus vulgaris OX=3885 PE=2 SV=1                                   | -1.536 |
| Cs3g17640                                                |                                                                                                                                                                                   | Chaperone protein dnaJ 1, mitochondrial OS=Arabidopsis thaliana OX=3702 GN=ATJ1 PE=2 SV=2                          | -1.037 |
| Cs4g07030                                                | K04078 1.6e-62 cic:CICLE_v10009281mg K04078 chaperonin GroES   (RefSeq) hypothetical protein                                                                                      | 20 kDa chaperonin, chloroplastic OS=Arabidopsis thaliana OX=3702 GN=CPN20 PE=1 SV=2                                | -1.076 |
| Cs4g08220                                                | K04079 0.0e+00 cic:CICLE_v10007633mg K04079 molecular chaperone HtpG   (RefSeq) hypothetical protein                                                                              | Heat shock cognate protein 80 OS=Solanium lycopersicum OX=4081 GN=HSC80 PE=2 SV=1                                  | -1.286 |
| Cs5g03150                                                | K04079 7.1e-271 cit:102616579 K04079 molecular chaperone HtpG   (RefSeq) heat shock protein 83-like                                                                               | Heat shock protein 83 OS=Ipomoea nil OX=35883 GN=HSP83A PE=2 SV=1                                                  | -1.705 |
| Cs5g34180                                                | K05864 6.6e-96 cit:102610492 K05864 peptidyl-prolyl isomerase D [EC:5.2.1.8]   (RefSeq) peptidyl-prolyl cis-trans isomerase CYP40                                                 | Peptidyl-prolyl cis-trans isomerase CYP40 OS=Arabidopsis thaliana OX=3702 GN=CYP40 PE=2 SV=1                       | -1.363 |
| Cs6g18810                                                | K09498 7.8e-65 cit:102616990 K09498 T-complex protein 1 subunit zeta   (RefSeq) T-complex protein 1 subunit zeta 1 isoform X1                                                     | T-complex protein 1 subunit zeta 1 OS=Arabidopsis thaliana OX=3702 GN=CCT6A PE=1 SV=1                              | -1.022 |
| Cs7g01450                                                | K03686 1.4e-28 cic:CICLE_v10031530mg K03686 molecular chaperone DnaJ   (RefSeq) hypothetical protein                                                                              | Chaperone protein dnaJ GFA2, mitochondrial OS=Arabidopsis thaliana OX=3702 GN=GFA2 PE=2 SV=1                       | -1.071 |
| Cs7g11140                                                | K03768 9.0e-42 cit:102625552 K03768 peptidyl-prolyl cis-trans isomerase B (cyclophilin B) [EC:5.2.1.8]   (RefSeq) photosynthetic NDH subunit of lumenal location 5, chloroplastic | Photosynthetic NDH subunit of lumenal location 5, chloroplastic OS=Arabidopsis thaliana OX=3702 GN=PNSL5 PE=1 SV=1 | -1.910 |
| Cs7g12130                                                | K09487 8.8e-81 cit:102629966 K09487 heat shock protein 90kDa beta   (RefSeq) heat shock protein 90-5, chloroplastic                                                               | Heat shock protein 90-5, chloroplastic OS=Arabidopsis thaliana OX=3702 GN=HSP90-5 PE=1 SV=1                        | -1.570 |



|                                                              |                                                                                                                             |                                                                                                                  |        |
|--------------------------------------------------------------|-----------------------------------------------------------------------------------------------------------------------------|------------------------------------------------------------------------------------------------------------------|--------|
| Cs7g16320                                                    | K03687 2.3e-89 cit:102608828 K03687 molecular chaperone GrpE   (RefSeq) uncharacterized protein LOC102608828 isoform X1     | (Uncharacterized protein LOC102608828 isoform X1 [Citrus sinensis])                                              | -1.217 |
| Cs7g16620                                                    | K09571 2.4e-84 cic:CICLE_v10031088mg K09571 FK506-binding protein 4/5 [EC:5.2.1.8]   (RefSeq) hypothetical protein          | 70 kDa peptidyl-prolyl isomerase OS=Triticum aestivum OX=4565 GN=FKBP70 PE=1 SV=1                                | -1.225 |
| Cs7g23510                                                    | K09503 6.0e-81 tcc:18586851 K09503 DnaJ homolog subfamily A member 2   (RefSeq) dnaJ protein homolog                        | DnaJ protein homolog ANJ1 OS=Atriplex nummularia OX=3553 PE=2 SV=1                                               | 1.258  |
| Cs8g03010                                                    | K04043 8.1e-199 cit:102615346 K04043 molecular chaperone DnaK   (RefSeq) heat shock 70 kDa protein, mitochondrial           | Heat shock 70 kDa protein, mitochondrial OS=Phaseolus vulgaris OX=3885 PE=2 SV=1                                 | -1.551 |
| Cs8g16040                                                    | K04077 2.6e-58 cre:CHLREDRAFT_136288 K04077 chaperonin GroEL   (RefSeq) CPN60B2; chaperonin 60B2                            | RuBisCO large subunit-binding protein subunit alpha, chloroplastic OS=Pisum sativum OX=3888 PE=1 SV=2            | -1.832 |
| Cs8g19520                                                    | K13993 1.1e-86 cic:CICLE_v10029437mg K13993 HSP20 family protein   (RefSeq) hypothetical protein                            | 18.2 kDa class I heat shock protein OS=Medicago sativa OX=3879 GN=HSP18.2 PE=2 SV=1                              | -2.519 |
| Cs9g03300                                                    | K04077 1.6e-133 cic:CICLE_v10014640mg K04077 chaperonin GroEL   (RefSeq) hypothetical protein                               | Chaperonin 60 subunit beta 1, chloroplastic OS=Arabidopsis thaliana OX=3702 GN=CPN60B1 PE=1 SV=3                 | -1.597 |
| Cs9g19220                                                    | K04079 5.5e-274 cic:CICLE_v10004456mg K04079 molecular chaperone HtpG   (RefSeq) hypothetical protein                       | Heat shock protein 83 OS=Ipomoea nil OX=35883 GN=HSP83A PE=2 SV=1                                                | -2.036 |
| orange1.1t00006                                              | K09496 1.8e-291 cic:CICLE_v10007963mg K09496 T-complex protein 1 subunit delta   (RefSeq) hypothetical protein              | T-complex protein 1 subunit delta OS=Arabidopsis thaliana OX=3702 GN=CCT4 PE=1 SV=1                              | -1.079 |
| orange1.1t01459                                              | K04077 1.1e-66 cit:102620413 K04077 chaperonin GroEL   (RefSeq) chaperonin CPN60-2, mitochondrial                           | Chaperonin CPN60, mitochondrial OS=Arabidopsis thaliana OX=3702 GN=CPN60 PE=1 SV=2                               | -1.626 |
| orange1.1t01933                                              | K03283 3.9e-138 cit:112495491 K03283 heat shock 70kDa protein 1/2/6/8   (RefSeq) heat shock 70 kDa protein 6, chloroplastic | Heat shock 70 kDa protein 6, chloroplastic OS=Arabidopsis thaliana OX=3702 GN=HSP70-6 PE=1 SV=1                  | -1.589 |
| <b>Ribosome biogenesis (GO:0042254; adjusted P = 0.0056)</b> |                                                                                                                             |                                                                                                                  |        |
| Cs1g13200                                                    | K14558 9.9e-260 cit:102614962 K14558 periodic tryptophan protein 2   (RefSeq) periodic tryptophan protein 2                 | Periodic tryptophan protein 2 OS=Arabidopsis thaliana OX=3702 GN=PWP2 PE=1 SV=1                                  | -1.251 |
| Cs1g16770                                                    | K14832 7.8e-140 cit:102626732 K14832 ribosome biogenesis protein MAK21   (RefSeq) CCAAT/enhancer-binding protein zeta       | (CCAAT/enhancer-binding protein zeta [Citrus sinensis])                                                          | -1.367 |
| Cs1g21890                                                    |                                                                                                                             | Ribonuclease III domain-containing protein RNC1, chloroplastic OS=Arabidopsis thaliana OX=3702 GN=RNC1 PE=2 SV=1 | -1.344 |

|                 |                                                                                                                                                      |                                                                                                                          |        |
|-----------------|------------------------------------------------------------------------------------------------------------------------------------------------------|--------------------------------------------------------------------------------------------------------------------------|--------|
| Cs2g09700       | K14793 8.1e-97 cit:102629432 K14793 ribosomal RNA-processing protein 9   (RefSeq) U3 snoRNP-associated protein-like EMB2271                          | U3 snoRNP-associated protein-like EMB2271<br>OS=Arabidopsis thaliana OX=3702 GN=EMB2271 PE=2 SV=1                        | -1.225 |
| Cs3g21970       | K13126 6.7e-12 mttr:MTR_6g040070 K13126 polyadenylate-binding protein   (RefSeq) DEAD/DEAH-box helicase                                              | DEAD-box ATP-dependent RNA helicase 39 OS=Oryza sativa subsp. japonica OX=39947 GN=Os01g0184500 PE=2 SV=1                | -1.173 |
| Cs5g06450       | K11294 5.7e-112 cit:102607837 K11294 nucleolin   (RefSeq) 28 kDa ribonucleoprotein, chloroplastic-like                                               | 31 kDa ribonucleoprotein, chloroplastic OS=Arabidopsis thaliana OX=3702 GN=CP31A PE=1 SV=1                               | -1.136 |
| Cs5g30340       | K14553 0.0e+00 cic:CICLE_v10019516mg K14553 U3 small nucleolar RNA-associated protein 18   (RefSeq) hypothetical protein                             | U3 small nucleolar RNA-associated protein 18 homolog OS=Arabidopsis thaliana OX=3702 GN=At5g14050 PE=1 SV=1              | -1.304 |
| Cs5g32250       | K14549 6.2e-296 cic:CICLE_v10019671mg K14549 U3 small nucleolar RNA-associated protein 15   (RefSeq) hypothetical protein                            | Protein SLOW WALKER 1 OS=Arabidopsis thaliana OX=3702 GN=SWA1 PE=2 SV=1                                                  | -1.526 |
| Cs6g16090       | K14769 3.0e-23 cit:102608730 K14769 U3 small nucleolar RNA-associated protein 11   (RefSeq) probable U3 small nucleolar RNA-associated protein 11    | Probable U3 small nucleolar RNA-associated protein 11 OS=Oryza sativa subsp. japonica OX=39947 GN=Os01g0810000 PE=2 SV=2 | -1.014 |
| Cs7g08170       |                                                                                                                                                      | (Uncharacterized protein LOC18045706 [Citrus clementina])                                                                | -1.016 |
| Cs7g13800       | K14563 1.2e-81 cic:CICLE_v10032221mg K14563 rRNA 2'-O-methyltransferase fibrillarin [EC:2.1.1.-]   (RefSeq) hypothetical protein                     | rRNA 2'-O-methyltransferase fibrillarin 1 OS=Arabidopsis thaliana OX=3702 GN=FIB1 PE=1 SV=1                              | -1.182 |
| Cs7g27880       | K02864 1.1e-111 cic:CICLE_v10032705mg K02864 large subunit ribosomal protein L10   (RefSeq) hypothetical protein                                     | 50S ribosomal protein L10, chloroplastic OS=Arabidopsis thaliana OX=3702 GN=RPL10 PE=2 SV=1                              | -1.101 |
| Cs7g32480       | K06941 4.3e-45 cic:CICLE_v10031999mg K06941 23S rRNA (adenine2503-C2)-methyltransferase [EC:2.1.1.192]   (RefSeq) hypothetical protein               | Telomere repeat-binding protein 4 OS=Arabidopsis thaliana OX=3702 GN=TRP4 PE=1 SV=1                                      | -1.149 |
| Cs8g06380       | K15032 2.0e-81 cit:102629419 K15032 mTERF domain-containing protein, mitochondrial   (RefSeq) transcription termination factor MTERF2, chloroplastic | Transcription termination factor MTERF2, chloroplastic OS=Arabidopsis thaliana OX=3702 GN=MTERF2 PE=3 SV=1               | -1.062 |
| Cs9g04840       | K03979 4.8e-43 mis:MICPUN_78980 K03979 GTPase [EC:3.6.5.-]   (RefSeq) predicted protein                                                              | GTP-binding protein OBGC, chloroplastic OS=Arabidopsis thaliana OX=3702 GN=OBGL PE=2 SV=1                                | -1.106 |
| Cs9g11490       | K06943 0.0e+00 cit:102614112 K06943 nucleolar GTP-binding protein   (RefSeq) nucleolar GTP-binding protein 1-like                                    | Nucleolar GTP-binding protein 1 OS=Arabidopsis thaliana OX=3702 GN=At1g50920 PE=2 SV=1                                   | -1.193 |
| orange1.1t00409 | K02931 6.5e-73 cic:CICLE_v10021696mg K02931 large subunit ribosomal protein L5   (RefSeq) hypothetical protein                                       | 50S ribosomal protein L5, chloroplastic OS=Arabidopsis thaliana OX=3702 GN=RPL5 PE=2 SV=1                                | -1.326 |

|                                                                            |                                                                                                                                             |                                                                                                                   |        |
|----------------------------------------------------------------------------|---------------------------------------------------------------------------------------------------------------------------------------------|-------------------------------------------------------------------------------------------------------------------|--------|
| orange1.1t02483                                                            |                                                                                                                                             | RAP domain-containing protein, chloroplastic<br>OS=Arabidopsis thaliana OX=3702 GN=RAP PE=1 SV=1                  | -1.235 |
| orange1.1t03017                                                            | K14556 1.8e-187 cic:CICLE_v10010984mg K14556 U3 small nucleolar RNA-associated protein 12   (RefSeq) hypothetical protein                   | (Hypothetical protein CUMW_233620 [Citrus unshiu])                                                                | -1.222 |
| orange1.1t04595                                                            | K11108 1.8e-86 cic:CICLE_v10028663mg K11108 RNA 3'-terminal phosphate cyclase-like protein   (RefSeq) hypothetical protein                  | Probable RNA 3'-terminal phosphate cyclase-like protein<br>OS=Arabidopsis thaliana OX=3702 GN=At5g22100 PE=2 SV=1 | -1.427 |
|                                                                            |                                                                                                                                             |                                                                                                                   |        |
| <b><i>Aminoacyl-tRNA biosynthesis (cit00970; corrected P = 0.6633)</i></b> |                                                                                                                                             |                                                                                                                   |        |
| Cs8g01360                                                                  | K01885 8.0e-87 cit:102612397 K01885 glutamyl-tRNA synthetase [EC:6.1.1.17]   (RefSeq) glutamate--tRNA ligase, chloroplastic/mitochondrial   | Glutamate--tRNA ligase, chloroplastic/mitochondrial<br>OS=Arabidopsis thaliana OX=3702 GN=OVA3 PE=1 SV=1          | -1.006 |
| Cs8g10730                                                                  | K01880 1.3e-196 cit:102621048 K01880 glycyl-tRNA synthetase [EC:6.1.1.14]   (RefSeq) glycine--tRNA ligase, mitochondrial 1-like             | Glycine--tRNA ligase, mitochondrial 1 OS=Arabidopsis thaliana OX=3702 GN=At1g29880 PE=1 SV=1                      | -1.088 |
| Cs9g04410                                                                  | K01870 8.8e-102 cit:102618088 K01870 isoleucyl-tRNA synthetase [EC:6.1.1.5]   (RefSeq) isoleucine--tRNA ligase, chloroplastic/mitochondrial | Isoleucine--tRNA ligase, chloroplastic/mitochondrial<br>OS=Arabidopsis thaliana OX=3702 GN=OVA2 PE=2 SV=1         | -1.177 |
|                                                                            |                                                                                                                                             |                                                                                                                   |        |
| <b><i>Biosynthesis of amino acids (cit01230; corrected P = 0.0260)</i></b> |                                                                                                                                             |                                                                                                                   |        |
| orange1.1t00226                                                            | K00615 1.8e-253 cic:CICLE_v10018991mg K00615 transketolase [EC:2.2.1.1]   (RefSeq) hypothetical protein                                     | Transketolase, chloroplastic OS=Zea mays OX=4577 PE=1 SV=1                                                        | -1.337 |
| Cs3g10480                                                                  | K01807 1.9e-150 cic:CICLE_v10002135mg K01807 ribose 5-phosphate isomerase A [EC:5.3.1.6]   (RefSeq) hypothetical protein                    | Probable ribose-5-phosphate isomerase 3, chloroplastic<br>OS=Arabidopsis thaliana OX=3702 GN=RPI3 PE=1 SV=1       | -1.730 |
| Cs5g10920                                                                  | K01783 3.3e-19 adu:107472214 K01783 ribulose-phosphate 3-epimerase [EC:5.1.3.1]   (RefSeq) ribulose-phosphate 3-epimerase, chloroplastic    | Ribulose-5-phosphate-3-epimerase, chloroplastic<br>OS=Arabidopsis thaliana OX=3702 GN=RPE PE=2 SV=1               | -1.001 |
| Cs3g17200                                                                  | K01755 8.0e-182 cit:102618891 K01755 argininosuccinate lyase [EC:4.3.2.1]   (RefSeq) argininosuccinate lyase, chloroplastic                 | Argininosuccinate lyase, chloroplastic OS=Arabidopsis thaliana OX=3702 GN=At5g10920 PE=2 SV=1                     | -1.097 |
| Cs3g11490                                                                  | K01738 3.2e-72 cic:CICLE_v10001793mg K01738 cysteine synthase [EC:2.5.1.47]   (RefSeq) hypothetical protein                                 | Cysteine synthase, chloroplastic/chromoplastic<br>OS=Solanium tuberosum OX=4113 PE=2 SV=1                         | -1.300 |
| Cs2g17560                                                                  | K00133 8.1e-100 cic:CICLE_v10015633mg K00133 aspartate-semialdehyde dehydrogenase [EC:1.2.1.11]   (RefSeq) hypothetical protein             | (Hypothetical protein CISIN_1g017153mg [Citrus sinensis])                                                         | -1.064 |

|                                                                                  |                                                                                                                                                                                  |                                                                                                                            |        |
|----------------------------------------------------------------------------------|----------------------------------------------------------------------------------------------------------------------------------------------------------------------------------|----------------------------------------------------------------------------------------------------------------------------|--------|
| orange1.1t03280                                                                  | K00927 9.7e-74 cic:CICLE_v10004891mg K00927 phosphoglycerate kinase [EC:2.7.2.3]   (RefSeq) hypothetical protein                                                                 | Phosphoglycerate kinase, chloroplastic OS=Nicotiana tabacum OX=4097 PE=2 SV=1                                              | -1.999 |
| Cs2g13700                                                                        | K01807 3.2e-144 cit:102627714 K01807 ribose 5-phosphate isomerase A [EC:5.3.1.6]   (RefSeq) probable ribose-5-phosphate isomerase 2                                              | Probable ribose-5-phosphate isomerase 2 OS=Arabidopsis thaliana OX=3702 GN=RPI2 PE=1 SV=1                                  | -1.305 |
| Cs7g30350                                                                        | K15227 2.6e-32 cic:CICLE_v10032371mg K15227 arogenate dehydrogenase (NADP+), plant [EC:1.3.1.78]   (RefSeq) hypothetical protein                                                 | Arogenate dehydrogenase 1, chloroplastic OS=Arabidopsis thaliana OX=3702 GN=TYRAAT1 PE=1 SV=1                              | 1.887  |
| orange1.1t02000                                                                  | K01626 2.2e-109 cit:102625514 K01626 3-deoxy-7-phosphoheptulonate synthase [EC:2.5.1.54]   (RefSeq) phospho-2-dehydro-3-deoxyheptonate aldolase 2, chloroplastic-like isoform X1 | Phospho-2-dehydro-3-deoxyheptonate aldolase 2, chloroplastic OS=Arabidopsis thaliana OX=3702 GN=DHS2 PE=2 SV=2             | -1.215 |
| Cs4g15090                                                                        | K01733 2.2e-298 cit:102628627 K01733 threonine synthase [EC:4.2.3.1]   (RefSeq) threonine synthase 1, chloroplastic                                                              | Threonine synthase 1, chloroplastic OS=Arabidopsis thaliana OX=3702 GN=TS1 PE=1 SV=1                                       | -1.164 |
| Cs5g07120                                                                        | K01940 1.1e-109 cit:102630538 K01940 argininosuccinate synthase [EC:6.3.4.5]   (RefSeq) argininosuccinate synthase, chloroplastic                                                | Argininosuccinate synthase, chloroplastic OS=Arabidopsis thaliana OX=3702 GN=At4g24830 PE=1 SV=3                           | -1.032 |
| Cs9g05680                                                                        | K01915 7.0e-71 cic:CICLE_v10005007mg K01915 glutamine synthetase [EC:6.3.1.2]   (RefSeq) hypothetical protein                                                                    | Glutamine synthetase, chloroplastic OS=Daucus carota OX=4039 GN=GLN2 PE=2 SV=1                                             | -1.445 |
| Cs7g16390                                                                        | K22846 7.4e-82 cic:CICLE_v10031768mg K22846 S-sulfo-L-cysteine synthase (O-acetyl-L-serine-dependent) [EC:2.5.1.144]   (RefSeq) hypothetical protein                             | S-sulfo-L-cysteine synthase (O-acetyl-L-serine-dependent), chloroplastic OS=Arabidopsis thaliana OX=3702 GN=CS26 PE=1 SV=1 | -2.495 |
| <b>Cellular amino acid catabolic process (GO:0009063; adjusted P = 0.8430)</b>   |                                                                                                                                                                                  |                                                                                                                            |        |
| Cs2g02890                                                                        | K00605 5.7e-118 cic:CICLE_v10015433mg K00605 aminomethyltransferase [EC:2.1.2.10]   (RefSeq) hypothetical protein                                                                | Aminomethyltransferase, mitochondrial OS=Solanum tuberosum OX=4113 GN=GDCST PE=2 SV=1                                      | -1.910 |
| Cs4g18520                                                                        | K00281 5.5e-312 cit:102627653 K00281 glycine dehydrogenase [EC:1.4.4.2]   (RefSeq) glycine dehydrogenase (decarboxylating), mitochondrial                                        | Glycine dehydrogenase (decarboxylating) A, mitochondrial OS=Flaveria pringlei OX=4226 GN=GDCSPA PE=2 SV=1                  | -1.292 |
| <b>Glycine, serine and threonine metabolism (cit00260; corrected P = 0.0214)</b> |                                                                                                                                                                                  |                                                                                                                            |        |
| Cs9g06720                                                                        | K00276 1.0e-185 cic:CICLE_v10004484mg K00276 primary-amine oxidase [EC:1.4.3.21]   (RefSeq) hypothetical protein                                                                 | Primary amine oxidase (Fragment) OS=Lens culinaris OX=3864 PE=1 SV=3                                                       | -3.393 |

|                                                                            |                                                                                                                                                     |                                                                                                           |        |
|----------------------------------------------------------------------------|-----------------------------------------------------------------------------------------------------------------------------------------------------|-----------------------------------------------------------------------------------------------------------|--------|
| Cs9g01670                                                                  | K00382 3.8e-234 cit:102627107 K00382 dihydrolipoamide dehydrogenase [EC:1.8.1.4]   (RefSeq) dihydrolipoyl dehydrogenase 1, mitochondrial isoform X1 | Dihydrolipoyl dehydrogenase 1, mitochondrial OS=Arabidopsis thaliana OX=3702 GN=LPD1 PE=1 SV=2            | -2.754 |
| Cs2g17560                                                                  | K00133 8.1e-100 cic:CICLE_v10015633mg K00133 aspartate-semialdehyde dehydrogenase [EC:1.2.1.11]   (RefSeq) hypothetical protein                     | (Hypothetical protein CISIN_1g017153mg [Citrus sinensis])                                                 | -1.064 |
| Cs9g06700                                                                  | K00276 4.5e-99 cic:CICLE_v10006614mg K00276 primary-amine oxidase [EC:1.4.3.21]   (RefSeq) hypothetical protein                                     | Primary amine oxidase 2 OS=Arabidopsis thaliana OX=3702 GN=At1g31672 PE=3 SV=1                            | 1.927  |
| Cs2g02890                                                                  | K00605 5.7e-118 cic:CICLE_v10015433mg K00605 aminomethyltransferase [EC:2.1.2.10]   (RefSeq) hypothetical protein                                   | Aminomethyltransferase, mitochondrial OS=Solanum tuberosum OX=4113 GN=GDCST PE=2 SV=1                     | -1.910 |
| Cs4g15090                                                                  | K01733 2.2e-298 cit:102628627 K01733 threonine synthase [EC:4.2.3.1]   (RefSeq) threonine synthase 1, chloroplastic                                 | Threonine synthase 1, chloroplastic OS=Arabidopsis thaliana OX=3702 GN=TS1 PE=1 SV=1                      | -1.164 |
| Cs4g18520                                                                  | K00281 5.5e-312 cit:102627653 K00281 glycine dehydrogenase [EC:1.4.4.2]   (RefSeq) glycine dehydrogenase (decarboxylating), mitochondrial           | Glycine dehydrogenase (decarboxylating) A, mitochondrial OS=Flaveria pringlei OX=4226 GN=GDCSPA PE=2 SV=1 | -1.292 |
| Cs1g15150                                                                  | K18606 2.3e-85 egr:104449883 K18606 hydroxyphenylpyruvate reductase [EC:1.1.1.237]   (RefSeq) hydroxyphenylpyruvate reductase                       | Glyoxylate/hydroxypyruvate/pyruvate reductase 2KGR OS=Vitis vinifera OX=29760 GN=2KGR PE=1 SV=1           | -1.048 |
| <b>Cysteine and methionine metabolism (cit00270; corrected P = 0.0681)</b> |                                                                                                                                                     |                                                                                                           |        |
| Cs3g11490                                                                  | K01738 3.2e-72 cic:CICLE_v10001793mg K01738 cysteine synthase [EC:2.5.1.47]   (RefSeq) hypothetical protein                                         | Cysteine synthase, chloroplastic/chromoplastic OS=Solanum tuberosum OX=4113 PE=2 SV=1                     | -1.300 |
| Cs5g10730                                                                  | K00026 2.1e-223 cit:102628532 K00026 malate dehydrogenase [EC:1.1.1.37]   (RefSeq) malate dehydrogenase, chloroplastic                              | Malate dehydrogenase, chloroplastic OS=Arabidopsis thaliana OX=3702 GN=At3g47520 PE=1 SV=1                | -1.256 |
| Cs2g17560                                                                  | K00133 8.1e-100 cic:CICLE_v10015633mg K00133 aspartate-semialdehyde dehydrogenase [EC:1.2.1.11]   (RefSeq) hypothetical protein                     | (Hypothetical protein CISIN_1g017153mg [Citrus sinensis])                                                 | -1.064 |
| orange1.1t01892                                                            | K01251 1.7e-141 cit:102617645 K01251 adenosylhomocysteinase [EC:3.3.1.1]   (RefSeq) adenosylhomocysteinase                                          | Adenosylhomocysteinase OS=Catharanthus roseus OX=4058 GN=SAHH PE=2 SV=1                                   | -1.124 |
| Cs9g04530                                                                  | K17398 8.7e-08 gmx:100792700 K17398 DNA (cytosine-5)-methyltransferase 3A [EC:2.1.1.37]   (RefSeq) uncharacterized protein LOC100792700             | (Hypothetical protein CICLE_v10006926mg [Citrus clementina])                                              | -1.360 |

|                                                                                     |                                                                                                                                                                      |                                                                                                                            |        |
|-------------------------------------------------------------------------------------|----------------------------------------------------------------------------------------------------------------------------------------------------------------------|----------------------------------------------------------------------------------------------------------------------------|--------|
| Cs7g12410                                                                           | K01611 9.7e-208 cit:102578065 K01611 S-adenosylmethionine decarboxylase [EC:4.1.1.50]   (RefSeq) SAMDC; S-adenosylmethionine decarboxylase                           | S-adenosylmethionine decarboxylase proenzyme OS=Nicotiana tabacum OX=4097 GN=SAMDC PE=2 SV=1                               | -1.653 |
| Cs7g25390                                                                           | K00026 1.5e-53 cic:CICLE_v10008562mg K00026 malate dehydrogenase [EC:1.1.1.37]   (RefSeq) hypothetical protein                                                       | Malate dehydrogenase, mitochondrial OS=Citrullus lanatus OX=3654 GN=MMDH PE=1 SV=1                                         | -1.555 |
| Cs7g16390                                                                           | K22846 7.4e-82 cic:CICLE_v10031768mg K22846 S-sulfo-L-cysteine synthase (O-acetyl-L-serine-dependent) [EC:2.5.1.144]   (RefSeq) hypothetical protein                 | S-sulfo-L-cysteine synthase (O-acetyl-L-serine-dependent), chloroplastic OS=Arabidopsis thaliana OX=3702 GN=CS26 PE=1 SV=1 | -2.495 |
| <i>Alanine, aspartate and glutamate metabolism (cit00250; corrected P = 0.0681)</i> |                                                                                                                                                                      |                                                                                                                            |        |
| Cs8g07660                                                                           | K00764 7.6e-168 cit:102622004 K00764 amidophosphoribosyltransferase [EC:2.4.2.14]   (RefSeq) LOW QUALITY PROTEIN: amidophosphoribosyltransferase, chloroplastic-like | Amidophosphoribosyltransferase 2, chloroplastic OS=Arabidopsis thaliana OX=3702 GN=ASE2 PE=1 SV=1                          | -1.418 |
| Cs8g17170                                                                           | K01955 0.0e+00 cic:CICLE_v10027703mg K01955 carbamoyl-phosphate synthase large subunit [EC:6.3.5.5]   (RefSeq) hypothetical protein                                  | Carbamoyl-phosphate synthase large chain, chloroplastic OS=Arabidopsis thaliana OX=3702 GN=CARB PE=1 SV=1                  | -1.345 |
| Cs5g07120                                                                           | K01940 1.1e-109 cit:102630538 K01940 argininosuccinate synthase [EC:6.3.4.5]   (RefSeq) argininosuccinate synthase, chloroplastic                                    | Argininosuccinate synthase, chloroplastic OS=Arabidopsis thaliana OX=3702 GN=At4g24830 PE=1 SV=3                           | -1.032 |
| Cs3g17200                                                                           | K01755 8.0e-182 cit:102618891 K01755 argininosuccinate lyase [EC:4.3.2.1]   (RefSeq) argininosuccinate lyase, chloroplastic                                          | Argininosuccinate lyase, chloroplastic OS=Arabidopsis thaliana OX=3702 GN=At5g10920 PE=2 SV=1                              | -1.097 |
| Cs9g05680                                                                           | K01915 7.0e-71 cic:CICLE_v10005007mg K01915 glutamine synthetase [EC:6.3.1.2]   (RefSeq) hypothetical protein                                                        | Glutamine synthetase, chloroplastic OS=Daucus carota OX=4039 GN=GLN2 PE=2 SV=1                                             | -1.445 |
| <i>Arginine biosynthesis (cit00220; corrected P = 0.2476)</i>                       |                                                                                                                                                                      |                                                                                                                            |        |
| Cs9g05680                                                                           | K01915 7.0e-71 cic:CICLE_v10005007mg K01915 glutamine synthetase [EC:6.3.1.2]   (RefSeq) hypothetical protein                                                        | Glutamine synthetase, chloroplastic OS=Daucus carota OX=4039 GN=GLN2 PE=2 SV=1                                             | -1.445 |
| Cs5g07120                                                                           | K01940 1.1e-109 cit:102630538 K01940 argininosuccinate synthase [EC:6.3.4.5]   (RefSeq) argininosuccinate synthase, chloroplastic                                    | Argininosuccinate synthase, chloroplastic OS=Arabidopsis thaliana OX=3702 GN=At4g24830 PE=1 SV=3                           | -1.032 |
| Cs3g17200                                                                           | K01755 8.0e-182 cit:102618891 K01755 argininosuccinate lyase [EC:4.3.2.1]   (RefSeq) argininosuccinate lyase, chloroplastic                                          | Argininosuccinate lyase, chloroplastic OS=Arabidopsis thaliana OX=3702 GN=At5g10920 PE=2 SV=1                              | -1.097 |

|                                                                                             |                                                                                                                                                                                   |                                                                                                                |        |
|---------------------------------------------------------------------------------------------|-----------------------------------------------------------------------------------------------------------------------------------------------------------------------------------|----------------------------------------------------------------------------------------------------------------|--------|
| <b>Tyrosine metabolism(cit00350; corrected P = 0.3519)</b>                                  |                                                                                                                                                                                   |                                                                                                                |        |
| Cs9g06720                                                                                   | K00276 1.0e-185 cic:CICLE_v10004484mg K00276 primary-amine oxidase [EC:1.4.3.21]   (RefSeq) hypothetical protein                                                                  | Primary amine oxidase (Fragment) OS=Lens culinaris OX=3864 PE=1 SV=3                                           | -3.393 |
| Cs9g06700                                                                                   | K00276 4.5e-99 cic:CICLE_v10006614mg K00276 primary-amine oxidase [EC:1.4.3.21]   (RefSeq) hypothetical protein                                                                   | Primary amine oxidase 2 OS=Arabidopsis thaliana OX=3702 GN=At1g31672 PE=3 SV=1                                 | 1.927  |
| Cs3g01240                                                                                   | K01800 1.4e-22 cic:CICLE_v10002464mg K01800 maleylacetoacetate isomerase [EC:5.2.1.2]   (RefSeq) hypothetical protein                                                             | Glutathione S-transferase zeta class OS=Euphorbia esula OX=3993 PE=2 SV=1                                      | 1.712  |
| Cs7g14430                                                                                   | K00121 1.7e-106 cit:102622247 K00121 S-(hydroxymethyl)glutathione dehydrogenase / alcohol dehydrogenase [EC:1.1.1.284 1.1.1.1]   (RefSeq) alcohol dehydrogenase-like 2 isoform X1 | CYP enzymes assisting alcohol dehydrogenase OS=Catharanthus roseus OX=4058 GN=CYPADH PE=1 SV=1                 | 1.605  |
| <b>Lysine biosynthesis(cit00300; corrected P = 0.5905)</b>                                  |                                                                                                                                                                                   |                                                                                                                |        |
| Cs2g17560                                                                                   | K00133 0 cit:102608194 aspartate-semialdehyde dehydrogenase-like; K00133 aspartate-semialdehyde dehydrogenase [EC:1.2.1.11] (A)                                                   | (Hypothetical protein CISIN_1g017153mg [Citrus sinensis])                                                      | -1.064 |
| <b>Phenylalanine, tyrosine and tryptophan biosynthesis (cit00400; corrected P = 0.6634)</b> |                                                                                                                                                                                   |                                                                                                                |        |
| orange1.1t02000                                                                             | K01626 2.2e-109 cit:102625514 K01626 3-deoxy-7-phosphoheptulonate synthase [EC:2.5.1.54]   (RefSeq) phospho-2-dehydro-3-deoxyheptonate aldolase 2, chloroplastic-like isoform X1  | Phospho-2-dehydro-3-deoxyheptonate aldolase 2, chloroplastic OS=Arabidopsis thaliana OX=3702 GN=DHS2 PE=2 SV=2 | -1.215 |
| Cs7g30350                                                                                   | K15227 2.6e-32 cic:CICLE_v10032371mg K15227 arogenate dehydrogenase (NADP+), plant [EC:1.3.1.78]   (RefSeq) hypothetical protein                                                  | Arogenate dehydrogenase 1, chloroplastic OS=Arabidopsis thaliana OX=3702 GN=TYRAAT1 PE=1 SV=1                  | 1.887  |
| <b>Phenylalanine metabolism (cit00360; corrected P = 0.6634)</b>                            |                                                                                                                                                                                   |                                                                                                                |        |
| Cs9g06720                                                                                   | K00276 1.0e-185 cic:CICLE_v10004484mg K00276 primary-amine oxidase [EC:1.4.3.21]   (RefSeq) hypothetical protein                                                                  | Primary amine oxidase (Fragment) OS=Lens culinaris OX=3864 PE=1 SV=3                                           | -3.393 |
| Cs9g06700                                                                                   | K00276 4.5e-99 cic:CICLE_v10006614mg K00276 primary-amine oxidase [EC:1.4.3.21]   (RefSeq) hypothetical protein                                                                   | Primary amine oxidase 2 OS=Arabidopsis thaliana OX=3702 GN=At1g31672 PE=3 SV=1                                 | 1.927  |
| <b>Histidine metabolism (cit00340; corrected P =0.6634)</b>                                 |                                                                                                                                                                                   |                                                                                                                |        |

|                                                                         |                                                                                                                                                     |                                                                                                   |        |
|-------------------------------------------------------------------------|-----------------------------------------------------------------------------------------------------------------------------------------------------|---------------------------------------------------------------------------------------------------|--------|
| Cs3g19820                                                               | K00128 2.9e-44 cit:102611460 K00128 aldehyde dehydrogenase (NAD+) [EC:1.2.1.3]   (RefSeq) aldehyde dehydrogenase family 3 member H1                 | Aldehyde dehydrogenase family 3 member H1<br>OS=Arabidopsis thaliana OX=3702 GN=ALDH3H1 PE=1 SV=2 | -1.055 |
| <i>Tryptophan metabolism (cit00380; corrected P = 0.6634)</i>           |                                                                                                                                                     |                                                                                                   |        |
| Cs3g19820                                                               | K00128 2.9e-44 cit:102611460 K00128 aldehyde dehydrogenase (NAD+) [EC:1.2.1.3]   (RefSeq) aldehyde dehydrogenase family 3 member H1                 | Aldehyde dehydrogenase family 3 member H1<br>OS=Arabidopsis thaliana OX=3702 GN=ALDH3H1 PE=1 SV=2 | -1.055 |
| Cs9g01670                                                               | K00382 3.8e-234 cit:102627107 K00382 dihydrolipoamide dehydrogenase [EC:1.8.1.4]   (RefSeq) dihydrolipoyl dehydrogenase 1, mitochondrial isoform X1 | Dihydrolipoyl dehydrogenase 1, mitochondrial<br>OS=Arabidopsis thaliana OX=3702 GN=LPD1 PE=1 SV=2 | -2.754 |
| <i>Arginine and proline metabolism (cit00330; corrected P = 0.6784)</i> |                                                                                                                                                     |                                                                                                   |        |
| Cs7g12410                                                               | K01611 9.7e-208 cit:102578065 K01611 S-adenosylmethionine decarboxylase [EC:4.1.1.50]   (RefSeq) SAMDC; S-adenosylmethionine decarboxylase          | S-adenosylmethionine decarboxylase proenzyme<br>OS=Nicotiana tabacum OX=4097 GN=SAMDC PE=2 SV=1   | -1.653 |
| Cs3g19820                                                               | K00128 2.9e-44 cit:102611460 K00128 aldehyde dehydrogenase (NAD+) [EC:1.2.1.3]   (RefSeq) aldehyde dehydrogenase family 3 member H1                 | Aldehyde dehydrogenase family 3 member H1<br>OS=Arabidopsis thaliana OX=3702 GN=ALDH3H1 PE=1 SV=2 | -1.055 |



**Table S10.** Low phosphate-responsive genes in low pH-treated *Citrus sinensis* leaves

| Accession No.                                                                        | KEGG_annotation                                                                                                                                                                                         | Swissprot_annotation (NR_annotation)                                                                                      | Log <sub>2</sub> (fold change) |
|--------------------------------------------------------------------------------------|---------------------------------------------------------------------------------------------------------------------------------------------------------------------------------------------------------|---------------------------------------------------------------------------------------------------------------------------|--------------------------------|
| <b><i>Organophosphate biosynthetic process (GO:0090407; adjusted P = 0.3825)</i></b> |                                                                                                                                                                                                         |                                                                                                                           |                                |
| Cs1g12410                                                                            |                                                                                                                                                                                                         | Phosphatidylcholine:diacylglycerol cholinephosphotransferase 1<br>OS=Arabidopsis thaliana OX=3702 GN=ROD1 PE=1 SV=1       | 1.449                          |
| Cs1g14970                                                                            | K06215 3.8e-168 cit:102610004 K06215 pyridoxal 5'-phosphate synthase pdxS subunit [EC:4.3.3.6]   (RefSeq) pyridoxal 5'-phosphate synthase-like subunit PDX1.2                                           | Pyridoxal 5'-phosphate synthase-like subunit PDX1.2<br>OS=Arabidopsis thaliana OX=3702 GN=PDX12 PE=1 SV=1                 | -1.362                         |
| Cs2g03080                                                                            | K02115 4.3e-195 cit:102629991 K02115 F-type H <sup>+</sup> -transporting ATPase subunit gamma   (RefSeq) ATP synthase gamma chain, chloroplastic                                                        | ATP synthase gamma chain, chloroplastic OS=Nicotiana tabacum<br>OX=4097 GN=ATPC PE=1 SV=1                                 | -1.309                         |
| Cs2g11760                                                                            | K17807 2.9e-41 cit:102607687 K17807 mitochondrial translocator assembly and maintenance protein 41   (RefSeq) phosphatidate cytidylyltransferase, mitochondrial isoform X1                              | (Hypothetical protein CISIN_1g037930mg, partial [Citrus sinensis])                                                        | 1.122                          |
| Cs5g03510                                                                            | K01951 1.9e-120 cic:CICLE_v10019676mg K01951 GMP synthase (glutamine-hydrolysing) [EC:6.3.5.2]   (RefSeq) hypothetical protein                                                                          | (Hypothetical protein CUMW_041950 [Citrus unshiu])                                                                        | -1.355                         |
| Cs5g05515                                                                            | K09680 2.6e-54 cit:102629945 K09680 type II pantothenate kinase [EC:2.7.1.33]   (RefSeq) pantothenate kinase 2                                                                                          | Pantothenate kinase 2 OS=Arabidopsis thaliana OX=3702<br>GN=PANK2 PE=1 SV=2                                               | -1.247                         |
| Cs5g10740                                                                            | K10960 3.6e-141 cic:CICLE_v10020061mg K10960 geranylgeranyl diphosphate/geranylgeranyl-bacteriochlorophyllide a reductase [EC:1.3.1.83 1.3.1.111]   (RefSeq) hypothetical protein                       | Geranylgeranyl diphosphate reductase, chloroplastic<br>OS=Arabidopsis thaliana OX=3702 GN=CHLP PE=1 SV=1                  | -1.716                         |
| Cs5g19690                                                                            | K11808 1.6e-06 qsu:111985940 K11808 phosphoribosylaminoimidazole carboxylase [EC:4.1.1.21]   (RefSeq) phosphoribosylaminoimidazole carboxylase, chloroplastic-like isoform X1                           | (Hypothetical protein CUMW_218330 [Citrus unshiu])                                                                        | -2.035                         |
| Cs5g28200                                                                            | K03527 2.1e-60 cit:102610997 K03527 4-hydroxy-3-methylbut-2-en-1-yl diphosphate reductase [EC:1.17.7.4]   (RefSeq) 4-hydroxy-3-methylbut-2-en-1-yl diphosphate reductase, chloroplastic-like isoform X1 | 4-hydroxy-3-methylbut-2-en-1-yl diphosphate reductase, chloroplastic OS=Arabidopsis thaliana OX=3702 GN=ISPH PE=1<br>SV=1 | -1.121                         |
| Cs8g07660                                                                            | K00764 7.6e-168 cit:102622004 K00764 amidophosphoribosyltransferase [EC:2.4.2.14]   (RefSeq) LOW QUALITY PROTEIN: amidophosphoribosyltransferase, chloroplastic-like                                    | Amidophosphoribosyltransferase 2, chloroplastic OS=Arabidopsis thaliana OX=3702 GN=ASE2 PE=1 SV=1                         | -1.418                         |
| Cs8g10730                                                                            | K01880 1.3e-196 cit:102621048 K01880 glycyl-tRNA synthetase [EC:6.1.1.14]   (RefSeq) glycine--tRNA ligase, mitochondrial 1-like                                                                         | Glycine--tRNA ligase, mitochondrial 1 OS=Arabidopsis thaliana OX=3702 GN=At1g29880 PE=1 SV=1                              | -1.088                         |

|                                                                            |                                                                                                                                                                                                      |                                                                                                                     |        |
|----------------------------------------------------------------------------|------------------------------------------------------------------------------------------------------------------------------------------------------------------------------------------------------|---------------------------------------------------------------------------------------------------------------------|--------|
| Cs8g13200                                                                  | K11808 5.1e-73 cit:102626933 K11808 phosphoribosylaminoimidazole carboxylase [EC:4.1.1.21]   (RefSeq) phosphoribosylaminoimidazole carboxylase, chloroplastic isoform X1                             | Phosphoribosylaminoimidazole carboxylase, chloroplastic (Fragment) OS=Vigna aconitifolia OX=3918 GN=PURKE PE=2 SV=1 | -1.164 |
| Cs8g20230                                                                  | K06215 4.4e-175 cic:CICLE_v10028683mg K06215 pyridoxal 5'-phosphate synthase pdxS subunit [EC:4.3.3.6]   (RefSeq) hypothetical protein                                                               | Probable pyridoxal 5'-phosphate synthase subunit PDX1 OS=Hevea brasiliensis OX=3981 GN=PDX1 PE=2 SV=1               | -1.356 |
|                                                                            |                                                                                                                                                                                                      |                                                                                                                     |        |
| <b>Organophosphate catabolic process (GO:0046434; adjusted P = 0.9655)</b> |                                                                                                                                                                                                      |                                                                                                                     |        |
| Cs7g02950                                                                  | K18696 2.5e-115 cic:CICLE_v10031648mg K18696 glycerophosphodiester phosphodiesterase [EC:3.1.4.46]   (RefSeq) hypothetical protein                                                                   | Glycerophosphodiester phosphodiesterase GDPD3 OS=Arabidopsis thaliana OX=3702 GN=GDPD3 PE=2 SV=1                    | 1.948  |
|                                                                            |                                                                                                                                                                                                      |                                                                                                                     |        |
| <b>Phospholipid catabolic process (GO:0009395; adjusted P = 0.6382)</b>    |                                                                                                                                                                                                      |                                                                                                                     |        |
| Cs7g02950                                                                  | K18696 2.5e-115 cic:CICLE_v10031648mg K18696 glycerophosphodiester phosphodiesterase [EC:3.1.4.46]   (RefSeq) hypothetical protein                                                                   | Glycerophosphodiester phosphodiesterase GDPD3 OS=Arabidopsis thaliana OX=3702 GN=GDPD3 PE=2 SV=1                    | 1.948  |
|                                                                            |                                                                                                                                                                                                      |                                                                                                                     |        |
| <b>Phospholipid biosynthetic process (GO:0008654; adjusted P = 0.7591)</b> |                                                                                                                                                                                                      |                                                                                                                     |        |
| Cs1g12410                                                                  |                                                                                                                                                                                                      | Phosphatidylcholine:diacylglycerol cholinephosphotransferase 1 OS=Arabidopsis thaliana OX=3702 GN=ROD1 PE=1 SV=1    | 1.449  |
| Cs2g11760                                                                  | K17807 2.9e-41 cit:102607687 K17807 mitochondrial translocator assembly and maintenance protein 41   (RefSeq) phosphatidate cytidyltransferase, mitochondrial isoform X1                             | (Hypothetical protein CISIN_1g037930mg, partial [Citrus sinensis])                                                  | 1.122  |
| Cs5g10740                                                                  | K10960 3.6e-141 cic:CICLE_v10020061mg K10960 geranylgeranyl diphosphate/geranylgeranyl-bacteriochlorophyllide a reductase [EC:1.3.1.83 1.3.1.111]   (RefSeq) hypothetical protein                    | Geranylgeranyl diphosphate reductase, chloroplastic OS=Arabidopsis thaliana OX=3702 GN=CHLP PE=1 SV=1               | -1.716 |
| Cs5g28200                                                                  | K03527 2.1e-60 cit:102610997 K03527 4-hydroxy-3-methylbut-2-en-1-yl diphosphate reductase [EC:1.17.7.4]   (RefSeq) 4-hydroxy-3-methylbut-2-enyl diphosphate reductase, chloroplastic-like isoform X1 | 4-hydroxy-3-methylbut-2-enyl diphosphate reductase, chloroplastic OS=Arabidopsis thaliana OX=3702 GN=ISPH PE=1 SV=1 | -1.121 |
|                                                                            |                                                                                                                                                                                                      |                                                                                                                     |        |
| <b>Glycerolipid catabolic process (GO:0046503; adjusted P = 0.3091)</b>    |                                                                                                                                                                                                      |                                                                                                                     |        |
| Cs7g02950                                                                  | K18696 2.5e-115 cic:CICLE_v10031648mg K18696 glycerophosphodiester phosphodiesterase [EC:3.1.4.46]   (RefSeq) hypothetical protein                                                                   | Glycerophosphodiester phosphodiesterase GDPD3 OS=Arabidopsis thaliana OX=3702 GN=GDPD3 PE=2 SV=1                    | 1.948  |
|                                                                            |                                                                                                                                                                                                      |                                                                                                                     |        |
| <b>Glycerolipid biosynthetic process (GO:0045017; adjusted P = 0.8568)</b> |                                                                                                                                                                                                      |                                                                                                                     |        |
| Cs1g12410                                                                  |                                                                                                                                                                                                      | Phosphatidylcholine:diacylglycerol cholinephosphotransferase 1 OS=Arabidopsis thaliana OX=3702 GN=ROD1 PE=1 SV=1    | 1.449  |

|                                                                                               |                                                                                                                                                                                                |                                                                                                                  |        |
|-----------------------------------------------------------------------------------------------|------------------------------------------------------------------------------------------------------------------------------------------------------------------------------------------------|------------------------------------------------------------------------------------------------------------------|--------|
| Cs2g11760                                                                                     | K17807 2.9e-41 cit:102607687 K17807 mitochondrial translocator assembly and maintenance protein 41   (RefSeq) phosphatidate cytidyltransferase, mitochondrial isoform X1                       | (Hypothetical protein CISIN_1g037930mg, partial [Citrus sinensis])                                               | 1.122  |
| Cs2g23350                                                                                     | K20098 4.7e-51 mtr:MTR_4g078460 K20098 DNA excision repair protein ERCC-6-like 2 [EC:3.6.4.-]   (RefSeq) DNA repair and recombination RAD26-like protein, putative                             | O-acyltransferase WSD1 OS=Arabidopsis thaliana OX=3702 GN=WSD1 PE=2 SV=1                                         | 1.830  |
|                                                                                               |                                                                                                                                                                                                |                                                                                                                  |        |
| <b>Cellular response to phosphate starvation (GO:0016036; adjusted P = 0.3682)</b>            |                                                                                                                                                                                                |                                                                                                                  |        |
| Cs1g18540                                                                                     | K13248 3.8e-85 cic:CICLE_v10026096mg K13248 pyridoxal phosphate phosphatase PHOSPHO2 [EC:3.1.3.74]   (RefSeq) hypothetical protein                                                             | Inorganic pyrophosphatase 1 OS=Arabidopsis thaliana OX=3702 GN=PS2 PE=1 SV=1                                     | 3.003  |
| Cs1g20920                                                                                     | K01610 1.9e-101 cit:102629129 K01610 phosphoenolpyruvate carboxykinase (ATP) [EC:4.1.1.49]   (RefSeq) phosphoenolpyruvate carboxykinase (ATP)-like                                             | Phosphoenolpyruvate carboxykinase (ATP) 1 OS=Arabidopsis thaliana OX=3702 GN=PCK1 PE=1 SV=1                      | 1.058  |
| Cs4g17870                                                                                     |                                                                                                                                                                                                | SPX domain-containing protein 2 OS=Arabidopsis thaliana OX=3702 GN=SPX2 PE=2 SV=1                                | 1.638  |
|                                                                                               |                                                                                                                                                                                                |                                                                                                                  |        |
| <b>Phosphate ion homeostasis (GO:0055062; adjusted P = 0.3530)</b>                            |                                                                                                                                                                                                |                                                                                                                  |        |
| Cs6g08320                                                                                     | K07300 1.9e-124 cic:CICLE_v10011720mg K07300 Ca <sup>2+</sup> :H <sup>+</sup> antiporter   (RefSeq) hypothetical protein                                                                       | Vacuolar cation/proton exchanger 3 OS=Arabidopsis thaliana OX=3702 GN=CAX3 PE=1 SV=1                             | -2.683 |
| Cs7g02950                                                                                     | K18696 2.5e-115 cic:CICLE_v10031648mg K18696 glycerophosphodiester phosphodiesterase [EC:3.1.4.46]   (RefSeq) hypothetical protein                                                             | Glycerophosphodiester phosphodiesterase GDPD3 OS=Arabidopsis thaliana OX=3702 GN=GDPD3 PE=2 SV=1                 | 1.948  |
|                                                                                               |                                                                                                                                                                                                |                                                                                                                  |        |
| <b>Inorganic phosphate transmembrane transporter activity (GO:0005315; adjusted = 0.2413)</b> |                                                                                                                                                                                                |                                                                                                                  |        |
| Cs4g04420                                                                                     | K02045 1.2e-13 cic:CHLNCDRAFT_143202 K02045 sulfate/thiosulfate transport system ATP-binding protein [EC:7.3.2.3]   (RefSeq) hypothetical protein                                              | ABC transporter I family member 17 OS=Arabidopsis thaliana OX=3702 GN=ABC117 PE=2 SV=1                           | 1.536  |
| Cs8g19980                                                                                     | K08193 1.8e-133 cic:CICLE_v10028231mg K08193 MFS transporter, ACS family, solute carrier family 17 (sodium-dependent inorganic phosphate cotransporter), other   (RefSeq) hypothetical protein | Sodium-dependent phosphate transport protein 1, chloroplastic OS=Arabidopsis thaliana OX=3702 GN=ANTR1 PE=1 SV=1 | -1.225 |
|                                                                                               |                                                                                                                                                                                                |                                                                                                                  |        |
| <b>Others</b>                                                                                 |                                                                                                                                                                                                |                                                                                                                  |        |
| Cs2g17940                                                                                     | K14379 4.2e-71 cit:102617538 K14379 tartrate-resistant acid phosphatase type 5 [EC:3.1.3.2]   (RefSeq) purple acid phosphatase 4                                                               | Purple acid phosphatase 8 OS=Arabidopsis thaliana OX=3702 GN=PAP8 PE=2 SV=1                                      | 2.494  |
| Cs2g18380                                                                                     | K01166 7.9e-45 cit:102616155 K01166 ribonuclease T2 [EC:4.6.1.19]   (RefSeq) ribonuclease 2                                                                                                    | Ribonuclease 2 OS=Arabidopsis thaliana OX=3702 GN=RNS2 PE=2 SV=1                                                 | 1.289  |

**Table S11.** Differentially expressed genes (DEGs) related to secondary metabolism in low pH-treated *Citrus sinensis* leaves

| Accession No.                                                                 | KEGG_annotation                                                                                                                                                                   | Swissprot_annotation (NR_annotation)                                                                                | Log <sub>2</sub> (fold change) |
|-------------------------------------------------------------------------------|-----------------------------------------------------------------------------------------------------------------------------------------------------------------------------------|---------------------------------------------------------------------------------------------------------------------|--------------------------------|
| <i>Biosynthesis of secondary metabolites (cit01110; corrected P = 0.0008)</i> |                                                                                                                                                                                   |                                                                                                                     |                                |
| orange1.1t00226                                                               | K00615 1.8e-253 cic:CICLE_v10018991mg K00615 transketolase [EC:2.2.1.1]   (RefSeq) hypothetical protein                                                                           | Transketolase, chloroplastic OS=Zea mays OX=4577 PE=1 SV=1                                                          | -1.337                         |
| Cs7g11110                                                                     | K00036 2.2e-114 cit:102624333 K00036 glucose-6-phosphate 1-dehydrogenase [EC:1.1.1.49 1.1.1.363]   (RefSeq) glucose-6-phosphate 1-dehydrogenase, chloroplastic isoform X1         | Glucose-6-phosphate 1-dehydrogenase, chloroplastic OS=Nicotiana tabacum OX=4097 PE=2 SV=1                           | -1.151                         |
| Cs7g14430                                                                     | K00121 1.7e-106 cit:102622247 K00121 S-(hydroxymethyl)glutathione dehydrogenase / alcohol dehydrogenase [EC:1.1.1.284 1.1.1.1]   (RefSeq) alcohol dehydrogenase-like 2 isoform X1 | CYP enzymes assisting alcohol dehydrogenase OS=Catharanthus roseus OX=4058 GN=CYPADH PE=1 SV=1                      | 1.605                          |
| Cs8g13200                                                                     | K11808 5.1e-73 cit:102626933 K11808 phosphoribosylaminoimidazole carboxylase [EC:4.1.1.21]   (RefSeq) phosphoribosylaminoimidazole carboxylase, chloroplastic isoform X1          | Phosphoribosylaminoimidazole carboxylase, chloroplastic (Fragment) OS=Vigna aconitifolia OX=3918 GN=PURKE PE=2 SV=1 | -1.164                         |
| Cs7g30350                                                                     | K15227 2.6e-32 cic:CICLE_v10032371mg K15227 arogenate dehydrogenase (NADP+), plant [EC:1.3.1.78]   (RefSeq) hypothetical protein                                                  | Arogenate dehydrogenase 1, chloroplastic OS=Arabidopsis thaliana OX=3702 GN=TYRAAT1 PE=1 SV=1                       | 1.887                          |
| Cs9g04920                                                                     | K19073 8.5e-235 cit:102611623 K19073 divinyl chlorophyllide a 8-vinyl-reductase [EC:1.3.1.75]   (RefSeq) divinyl chlorophyllide a 8-vinyl-reductase, chloroplastic                | Divinyl chlorophyllide a 8-vinyl-reductase, chloroplastic OS=Cucumis sativus OX=3659 GN=DVR PE=1 SV=1               | -1.624                         |
| Cs4g02360                                                                     | K13065 8.6e-109 cit:102628720 K13065 shikimate O-hydroxycinnamoyltransferase [EC:2.3.1.133]   (RefSeq) shikimate O-hydroxycinnamoyltransferase-like                               | Shikimate O-hydroxycinnamoyltransferase OS=Nicotiana tabacum OX=4097 GN=HST PE=1 SV=1                               | -1.482                         |
| Cs4g18520                                                                     | K00281 5.5e-312 cit:102627653 K00281 glycine dehydrogenase [EC:1.4.4.2]   (RefSeq) glycine dehydrogenase (decarboxylating), mitochondrial                                         | Glycine dehydrogenase (decarboxylating) A, mitochondrial OS=Flaveria pringlei OX=4226 GN=GDCSPA PE=2 SV=1           | -1.292                         |
| Cs3g11180                                                                     | K00514 7.0e-92 cit:102577969 K00514 zeta-carotene desaturase [EC:1.3.5.6]   (RefSeq) ZDS                                                                                          | Zeta-carotene desaturase, chloroplastic/chromoplastic OS=Capsicum annuum OX=4072 GN=ZDS PE=1 SV=1                   | -1.675                         |
| orange1.1t02947                                                               | K13066 1.8e-102 cit:102620533 K13066 caffeic acid 3-O-methyltransferase [EC:2.1.1.68]   (RefSeq) anthranilate N-methyltransferase-like                                            | Flavone 3'-O-methyltransferase 1 OS=Arabidopsis thaliana OX=3702 GN=OMT1 PE=1 SV=1                                  | -3.099                         |

|                 |                                                                                                                                                                      |                                                                                                           |        |
|-----------------|----------------------------------------------------------------------------------------------------------------------------------------------------------------------|-----------------------------------------------------------------------------------------------------------|--------|
| Cs1g06850       | K00218 5.4e-124 cit:102614959 K00218 protochlorophyllide reductase [EC:1.3.1.33]   (RefSeq) protochlorophyllide reductase, chloroplastic                             | Protochlorophyllide reductase, chloroplastic OS=Cucumis sativus OX=3659 GN=PORA PE=2 SV=1                 | -1.307 |
| Cs2g02890       | K00605 5.7e-118 cic:CICLE_v10015433mg K00605 aminomethyltransferase [EC:2.1.2.10]   (RefSeq) hypothetical protein                                                    | Aminomethyltransferase, mitochondrial OS=Solanum tuberosum OX=4113 GN=GDCST PE=2 SV=1                     | -1.910 |
| Cs5g11730       | K05280 1.8e-162 cit:102620909 K05280 flavonoid 3'-monooxygenase [EC:1.14.14.82]   (RefSeq) flavonoid 3'-monooxygenase                                                | Flavonoid 3'-monooxygenase OS=Petunia hybrida OX=4102 GN=CYP75B2 PE=2 SV=1                                | -3.552 |
| orange1.1t03280 | K00927 9.7e-74 cic:CICLE_v10004891mg K00927 phosphoglycerate kinase [EC:2.7.2.3]   (RefSeq) hypothetical protein                                                     | Phosphoglycerate kinase, chloroplastic OS=Nicotiana tabacum OX=4097 PE=2 SV=1                             | -1.999 |
| Cs7g25390       | K00026 1.5e-53 cic:CICLE_v10008562mg K00026 malate dehydrogenase [EC:1.1.1.37]   (RefSeq) hypothetical protein                                                       | Malate dehydrogenase, mitochondrial OS=Citrullus lanatus OX=3654 GN=MMDH PE=1 SV=1                        | -1.555 |
| Cs3g04170       | K15096 2.7e-244 cit:102607029 K15096 (R)-limonene synthase [EC:4.2.3.20]   (RefSeq) (R)-limonene synthase 1, chloroplastic                                           | (R)-limonene synthase 1, chloroplastic OS=Citrus sinensis OX=2711 PE=1 SV=2                               | 2.811  |
| Cs8g07660       | K00764 7.6e-168 cit:102622004 K00764 amidophosphoribosyltransferase [EC:2.4.2.14]   (RefSeq) LOW QUALITY PROTEIN: amidophosphoribosyltransferase, chloroplastic-like | Amidophosphoribosyltransferase 2, chloroplastic OS=Arabidopsis thaliana OX=3702 GN=ASE2 PE=1 SV=1         | -1.418 |
| Cs4g15090       | K01733 2.2e-298 cit:102628627 K01733 threonine synthase [EC:4.2.3.1]   (RefSeq) threonine synthase 1, chloroplastic                                                  | Threonine synthase 1, chloroplastic OS=Arabidopsis thaliana OX=3702 GN=TS1 PE=1 SV=1                      | -1.164 |
| Cs1g24440       | K21483 5.6e-135 cit:102613997 K21483 salicylate 1-O-methyltransferase [EC:2.1.1.274]   (RefSeq) salicylate carboxymethyltransferase                                  | Salicylate carboxymethyltransferase OS=Clarkia breweri OX=36903 GN=SAMT PE=1 SV=1                         | -3.138 |
| Cs6g21370       | K00703 1.0e-258 cit:102614846 K00703 starch synthase [EC:2.4.1.21]   (RefSeq) granule-bound starch synthase 2, chloroplastic/amyloplastic                            | Granule-bound starch synthase 2, chloroplastic/amyloplastic OS=Solanum tuberosum OX=4113 GN=SS2 PE=1 SV=3 | -1.754 |
| Cs1g15150       | K18606 2.3e-85 egr:104449883 K18606 hydroxyphenylpyruvate reductase [EC:1.1.1.237]   (RefSeq) hydroxyphenylpyruvate reductase                                        | Glyoxylate/hydroxypyruvate/pyruvate reductase 2KGR OS=Vitis vinifera OX=29760 GN=2KGR PE=1 SV=1           | -1.048 |
| Cs7g13850       | K01749 3.5e-93 cic:CICLE_v10031858mg K01749 hydroxymethylbilane synthase [EC:2.5.1.61]   (RefSeq) hypothetical protein                                               | Porphobilinogen deaminase, chloroplastic OS=Pisum sativum OX=3888 GN=HEMC PE=1 SV=1                       | -1.414 |
| Cs3g19770       | K21604 3.0e-71 cit:102608592 K21604 jasmonoyl-L-amino acid hydrolase [EC:3.5.1.127]   (RefSeq) IAA-amino acid hydrolase ILR1-like 6                                  | IAA-amino acid hydrolase ILR1-like 6 OS=Oryza sativa subsp. japonica OX=39947 GN=ILL6 PE=2 SV=1           | -1.120 |

|                 |                                                                                                                                                                                   |                                                                                                                            |        |
|-----------------|-----------------------------------------------------------------------------------------------------------------------------------------------------------------------------------|----------------------------------------------------------------------------------------------------------------------------|--------|
| Cs9g06360       | K00975 2.1e-69 cic:CICLE_v10004731mg K00975 glucose-1-phosphate adenylyltransferase [EC:2.7.7.27]   (RefSeq) hypothetical protein                                                 | Glucose-1-phosphate adenylyltransferase large subunit 1, chloroplastic OS=Arabidopsis thaliana OX=3702 GN=ADG2 PE=1 SV=3   | -1.206 |
| Cs2g17050       | K01835 1.1e-16 cic:CICLE_v10014721mg K01835 phosphoglucomutase [EC:5.4.2.2]   (RefSeq) hypothetical protein                                                                       | Probable phosphoglucomutase, cytoplasmic 1 OS=Arabidopsis thaliana OX=3702 GN=At1g23190 PE=2 SV=2                          | -1.761 |
| Cs7g16390       | K22846 7.4e-82 cic:CICLE_v10031768mg K22846 S-sulfo-L-cysteine synthase (O-acetyl-L-serine-dependent) [EC:2.5.1.144]   (RefSeq) hypothetical protein                              | S-sulfo-L-cysteine synthase (O-acetyl-L-serine-dependent), chloroplastic OS=Arabidopsis thaliana OX=3702 GN=CS26 PE=1 SV=1 | -2.495 |
| Cs3g10480       | K01807 1.9e-150 cic:CICLE_v10002135mg K01807 ribose 5-phosphate isomerase A [EC:5.3.1.6]   (RefSeq) hypothetical protein                                                          | Probable ribose-5-phosphate isomerase 3, chloroplastic OS=Arabidopsis thaliana OX=3702 GN=RPI3 PE=1 SV=1                   | -1.730 |
| Cs9g06720       | K00276 1.0e-185 cic:CICLE_v10004484mg K00276 primary-amine oxidase [EC:1.4.3.21]   (RefSeq) hypothetical protein                                                                  | Primary amine oxidase (Fragment) OS=Lens culinaris OX=3864 PE=1 SV=3                                                       | -3.393 |
| Cs3g17200       | K01755 8.0e-182 cit:102618891 K01755 argininosuccinate lyase [EC:4.3.2.1]   (RefSeq) argininosuccinate lyase, chloroplastic                                                       | Argininosuccinate lyase, chloroplastic OS=Arabidopsis thaliana OX=3702 GN=At5g10920 PE=2 SV=1                              | -1.097 |
| Cs1g19540       | K00430 8.3e-83 cit:102611617 K00430 peroxidase [EC:1.11.1.7]   (RefSeq) peroxidase 47                                                                                             | Peroxidase 47 OS=Arabidopsis thaliana OX=3702 GN=PER47 PE=2 SV=2                                                           | 1.667  |
| Cs5g10730       | K00026 2.1e-223 cit:102628532 K00026 malate dehydrogenase [EC:1.1.1.37]   (RefSeq) malate dehydrogenase, chloroplastic                                                            | Malate dehydrogenase, chloroplastic OS=Arabidopsis thaliana OX=3702 GN=At3g47520 PE=1 SV=1                                 | -1.256 |
| Cs5g26080       | K09839 2.5e-150 cic:CICLE_v10019925mg K09839 violaxanthin de-epoxidase [EC:1.23.5.1]   (RefSeq) hypothetical protein                                                              | Violaxanthin de-epoxidase, chloroplastic OS=Spinacia oleracea OX=3562 GN=VDE1 PE=1 SV=2                                    | -1.246 |
| Cs7g22830       | K04123 6.5e-134 cic:CICLE_v10031341mg K04123 ent-kaurenoic acid monooxygenase [EC:1.14.14.107]   (RefSeq) hypothetical protein                                                    | Ent-kaurenoic acid oxidase 2 OS=Arabidopsis thaliana OX=3702 GN=KAO2 PE=1 SV=2                                             | 1.318  |
| Cs3g16730       | K02492 4.2e-206 cit:102624392 K02492 glutamyl-tRNA reductase [EC:1.2.1.70]   (RefSeq) glutamyl-tRNA reductase 1, chloroplastic                                                    | Glutamyl-tRNA reductase 1, chloroplastic OS=Cucumis sativus OX=3659 GN=HEMA1 PE=2 SV=1                                     | -1.277 |
| Cs5g10740       | K10960 3.6e-141 cic:CICLE_v10020061mg K10960 geranylgeranyl diphosphate/geranylgeranyl-bacteriochlorophyllide a reductase [EC:1.3.1.83 1.3.1.111]   (RefSeq) hypothetical protein | Geranylgeranyl diphosphate reductase, chloroplastic OS=Arabidopsis thaliana OX=3702 GN=CHLP PE=1 SV=1                      | -1.716 |
| orange1.1t02000 | K01626 2.2e-109 cit:102625514 K01626 3-deoxy-7-phosphoheptulonate synthase [EC:2.5.1.54]   (RefSeq) phospho-2-dehydro-3-deoxyheptonate aldolase 2, chloroplastic-like isoform X1  | Phospho-2-dehydro-3-deoxyheptonate aldolase 2, chloroplastic OS=Arabidopsis thaliana OX=3702 GN=DHS2 PE=2 SV=2             | -1.215 |
| Cs7g01350       | K01188 1.0e-74 cic:CICLE_v10031209mg K01188 beta-glucosidase [EC:3.2.1.21]   (RefSeq) hypothetical protein                                                                        | Beta-glucosidase 13 OS=Oryza sativa subsp. japonica OX=39947 GN=BGLU13 PE=2 SV=2                                           | -1.095 |

|           |                                                                                                                                                                                                                                        |                                                                                                                                                   |        |
|-----------|----------------------------------------------------------------------------------------------------------------------------------------------------------------------------------------------------------------------------------------|---------------------------------------------------------------------------------------------------------------------------------------------------|--------|
| Cs7g13170 | K00627 2.3e-167 cit:102609118 K00627 pyruvate dehydrogenase E2 component (dihydrolipoamide acetyltransferase) [EC:2.3.1.12]   (RefSeq) dihydrolipoamide acetyltransferase component 4 of pyruvate dehydrogenase complex, chloroplastic | Dihydrolipoamide acetyltransferase component 4 of pyruvate dehydrogenase complex, chloroplastic OS=Arabidopsis thaliana OX=3702 GN=LTA2 PE=2 SV=1 | -1.118 |
| Cs4g14850 | K06444 8.6e-73 cit:CICLE_v10008410mg K06444 lycopene epsilon-cyclase [EC:5.5.1.18]   (RefSeq) hypothetical protein                                                                                                                     | Lycopene epsilon cyclase, chloroplastic OS=Arabidopsis thaliana OX=3702 GN=LUT2 PE=1 SV=2                                                         | -1.121 |
| Cs5g28200 | K03527 2.1e-60 cit:102610997 K03527 4-hydroxy-3-methylbut-2-en-1-yl diphosphate reductase [EC:1.17.7.4]   (RefSeq) 4-hydroxy-3-methylbut-2-en-1-yl diphosphate reductase, chloroplastic-like isoform X1                                | 4-hydroxy-3-methylbut-2-en-1-yl diphosphate reductase, chloroplastic OS=Arabidopsis thaliana OX=3702 GN=ISPH PE=1 SV=1                            | -1.121 |
| Cs4g17260 | K15397 0.0e+00 cit:CICLE_v10007916mg K15397 3-ketoacyl-CoA synthase [EC:2.3.1.199]   (RefSeq) hypothetical protein                                                                                                                     | 3-ketoacyl-CoA synthase 11 OS=Arabidopsis thaliana OX=3702 GN=KCS11 PE=1 SV=1                                                                     | 1.194  |
| Cs7g11300 | K20619 2.2e-179 cit:CICLE_v10031237mg K20619 cytochrome P450 family 78 subfamily A   (RefSeq) hypothetical protein                                                                                                                     | Cytochrome P450 78A5 OS=Arabidopsis thaliana OX=3702 GN=CYP78A5 PE=2 SV=1                                                                         | 1.670  |
| Cs3g11490 | K01738 3.2e-72 cit:CICLE_v10001793mg K01738 cysteine synthase [EC:2.5.1.47]   (RefSeq) hypothetical protein                                                                                                                            | Cysteine synthase, chloroplastic/chromoplastic OS=Solanum tuberosum OX=4113 PE=2 SV=1                                                             | -1.300 |
| Cs1g20920 | K01610 1.9e-101 cit:102629129 K01610 phosphoenolpyruvate carboxykinase (ATP) [EC:4.1.1.49]   (RefSeq) phosphoenolpyruvate carboxykinase (ATP)-like                                                                                     | Phosphoenolpyruvate carboxykinase (ATP) 1 OS=Arabidopsis thaliana OX=3702 GN=PCK1 PE=1 SV=1                                                       | 1.058  |
| Cs5g10920 | K01783 3.3e-19 adu:107472214 K01783 ribulose-phosphate 3-epimerase [EC:5.1.3.1]   (RefSeq) ribulose-phosphate 3-epimerase, chloroplastic                                                                                               | Ribulose-5-phosphate-3-epimerase, chloroplastic OS=Arabidopsis thaliana OX=3702 GN=RPE PE=2 SV=1                                                  | -1.001 |
| Cs8g01360 | K01885 8.0e-87 cit:102612397 K01885 glutamyl-tRNA synthetase [EC:6.1.1.17]   (RefSeq) glutamate--tRNA ligase, chloroplastic/mitochondrial                                                                                              | Glutamate--tRNA ligase, chloroplastic/mitochondrial OS=Arabidopsis thaliana OX=3702 GN=OVA3 PE=1 SV=1                                             | -1.006 |
| Cs9g01670 | K00382 3.8e-234 cit:102627107 K00382 dihydrolipoamide dehydrogenase [EC:1.8.1.4]   (RefSeq) dihydrolipoamide dehydrogenase 1, mitochondrial isoform X1                                                                                 | Dihydrolipoamide dehydrogenase 1, mitochondrial OS=Arabidopsis thaliana OX=3702 GN=LPD1 PE=1 SV=2                                                 | -2.754 |
| Cs2g17560 | K00133 8.1e-100 cit:CICLE_v10015633mg K00133 aspartate-semialdehyde dehydrogenase [EC:1.2.1.11]   (RefSeq) hypothetical protein                                                                                                        | (Hypothetical protein CISIN_1g017153mg [Citrus sinensis])                                                                                         | -1.064 |
| Cs4g07830 | K02259 2.5e-61 cit:102630339 K02259 cytochrome c oxidase assembly protein subunit 15   (RefSeq) cytochrome c oxidase assembly protein COX15                                                                                            | Cytochrome c oxidase assembly protein COX15 OS=Arabidopsis thaliana OX=3702 GN=COX15 PE=2 SV=1                                                    | -1.542 |

|                                                                      |                                                                                                                                                     |                                                                                                  |        |
|----------------------------------------------------------------------|-----------------------------------------------------------------------------------------------------------------------------------------------------|--------------------------------------------------------------------------------------------------|--------|
| Cs1g22590                                                            | K13066 8.2e-73 cit:102629858 K13066 caffeic acid 3-O-methyltransferase [EC:2.1.1.68]   (RefSeq) caffeic acid 3-O-methyltransferase                  | Caffeic acid 3-O-methyltransferase OS=Eucalyptus gunnii OX=3933 GN=OMT PE=2 SV=1                 | -1.942 |
| Cs2g13700                                                            | K01807 3.2e-144 cit:102627714 K01807 ribose 5-phosphate isomerase A [EC:5.3.1.6]   (RefSeq) probable ribose-5-phosphate isomerase 2                 | Probable ribose-5-phosphate isomerase 2 OS=Arabidopsis thaliana OX=3702 GN=RPI2 PE=1 SV=1        | -1.305 |
| Cs9g06700                                                            | K00276 4.5e-99 cit:CICLE_v10006614mg K00276 primary-amine oxidase [EC:1.4.3.21]   (RefSeq) hypothetical protein                                     | Primary amine oxidase 2 OS=Arabidopsis thaliana OX=3702 GN=At1g31672 PE=3 SV=1                   | 1.927  |
| Cs3g19820                                                            | K00128 2.9e-44 cit:102611460 K00128 aldehyde dehydrogenase (NAD+) [EC:1.2.1.3]   (RefSeq) aldehyde dehydrogenase family 3 member H1                 | Aldehyde dehydrogenase family 3 member H1 OS=Arabidopsis thaliana OX=3702 GN=ALDH3H1 PE=1 SV=2   | -1.055 |
| Cs6g07430                                                            | K03841 1.5e-138 cit:CICLE_v10011855mg K03841 fructose-1,6-bisphosphatase I [EC:3.1.3.11]   (RefSeq) hypothetical protein                            | Fructose-1,6-bisphosphatase 1, chloroplastic OS=Arabidopsis thaliana OX=3702 GN=CFBP1 PE=1 SV=2  | -1.619 |
| Cs9g16520                                                            | K05282 4.5e-167 cit:102608767 K05282 gibberellin-44 dioxygenase [EC:1.14.11.12]   (RefSeq) gibberellin 20 oxidase 1                                 | Gibberellin 20 oxidase 2 OS=Arabidopsis thaliana OX=3702 GN=GA20OX2 PE=2 SV=1                    | -2.607 |
| orange1.1t05474                                                      | K01835 3.9e-26 cit:CICLE_v10014721mg K01835 phosphoglucomutase [EC:5.4.2.2]   (RefSeq) hypothetical protein                                         | Phosphoglucomutase, cytoplasmic OS=Mesembryanthemum crystallinum OX=3544 GN=PGM1 PE=2 SV=1       | -1.607 |
| Cs5g07120                                                            | K01940 1.1e-109 cit:102630538 K01940 argininosuccinate synthase [EC:6.3.4.5]   (RefSeq) argininosuccinate synthase, chloroplastic                   | Argininosuccinate synthase, chloroplastic OS=Arabidopsis thaliana OX=3702 GN=At4g24830 PE=1 SV=3 | -1.032 |
| orange1.1t06069                                                      | K00514 1.4e-32 cit:102577969 K00514 zeta-carotene desaturase [EC:1.3.5.6]   (RefSeq) ZDS                                                            | Zeta-carotene desaturase, chloroplastic/chromoplastic OS=Tagetes erecta OX=13708 PE=2 SV=1       | 1.528  |
| Cs2g05100                                                            | K03405 6.0e-194 cit:102620862 K03405 magnesium chelatase subunit I [EC:6.6.1.1]   (RefSeq) magnesium-chelatase subunit ChII, chloroplastic          | Magnesium-chelatase subunit ChII, chloroplastic OS=Glycine max OX=3847 GN=CHLI PE=2 SV=1         | -1.158 |
|                                                                      |                                                                                                                                                     |                                                                                                  |        |
| <b>Phenylpropanoid biosynthesis (cit00940; corrected P = 0.7323)</b> |                                                                                                                                                     |                                                                                                  |        |
| Cs4g02360                                                            | K13065 8.6e-109 cit:102628720 K13065 shikimate O-hydroxycinnamoyltransferase [EC:2.3.1.133]   (RefSeq) shikimate O-hydroxycinnamoyltransferase-like | Shikimate O-hydroxycinnamoyltransferase OS=Nicotiana tabacum OX=4097 GN=HST PE=1 SV=1            | -1.482 |
| Cs7g01350                                                            | K01188 1.0e-74 cit:CICLE_v10031209mg K01188 beta-glucosidase [EC:3.2.1.21]   (RefSeq) hypothetical protein                                          | Beta-glucosidase 13 OS=Oryza sativa subsp. japonica OX=39947 GN=BGLU13 PE=2 SV=2                 | -1.095 |



|                                                                                 |                                                                                                                                                               |                                                                                                        |        |
|---------------------------------------------------------------------------------|---------------------------------------------------------------------------------------------------------------------------------------------------------------|--------------------------------------------------------------------------------------------------------|--------|
| orange1.1t02947                                                                 | K13066 1.8e-102 cit:102620533 K13066 caffeic acid 3-O-methyltransferase [EC:2.1.1.68]   (RefSeq) anthranilate N-methyltransferase-like                        | Flavone 3'-O-methyltransferase 1 OS=Arabidopsis thaliana OX=3702 GN=OMT1 PE=1 SV=1                     | -3.099 |
| Cs1g19540                                                                       | K00430 8.3e-83 cit:102611617 K00430 peroxidase [EC:1.11.1.7]   (RefSeq) peroxidase 47                                                                         | Peroxidase 47 OS=Arabidopsis thaliana OX=3702 GN=PER47 PE=2 SV=2                                       | 1.667  |
| Cs2g10070                                                                       | K22395 1.2e-311 cit:102618663 K22395 cinnamyl-alcohol dehydrogenase [EC:1.1.1.195]   (RefSeq) berberine bridge enzyme-like 13                                 | Berberine bridge enzyme-like 13 OS=Arabidopsis thaliana OX=3702 GN=At1g30760 PE=1 SV=1                 | 1.700  |
| Cs1g22590                                                                       | K13066 8.2e-73 cit:102629858 K13066 caffeic acid 3-O-methyltransferase [EC:2.1.1.68]   (RefSeq) caffeic acid 3-O-methyltransferase                            | Caffeic acid 3-O-methyltransferase OS=Eucalyptus gunnii OX=3933 GN=OMT PE=2 SV=1                       | -1.942 |
| <b><i>Vitamin B<sub>6</sub> metabolism (cit00750; corrected P = 0.0181)</i></b> |                                                                                                                                                               |                                                                                                        |        |
| Cs1g14970                                                                       | K06215 3.8e-168 cit:102610004 K06215 pyridoxal 5'-phosphate synthase pdxS subunit [EC:4.3.3.6]   (RefSeq) pyridoxal 5'-phosphate synthase-like subunit PDX1.2 | Pyridoxal 5'-phosphate synthase-like subunit PDX1.2 OS=Arabidopsis thaliana OX=3702 GN=PDX12 PE=1 SV=1 | -1.362 |
| Cs1g18540                                                                       | K13248 3.8e-85 cit:CICLE_v10026096mg K13248 pyridoxal phosphate phosphatase PHOSPHO2 [EC:3.1.3.74]   (RefSeq) hypothetical protein                            | Inorganic pyrophosphatase 1 OS=Arabidopsis thaliana OX=3702 GN=PS2 PE=1 SV=1                           | 3.003  |
| Cs8g20230                                                                       | K06215 4.4e-175 cit:CICLE_v10028683mg K06215 pyridoxal 5'-phosphate synthase pdxS subunit [EC:4.3.3.6]   (RefSeq) hypothetical protein                        | Probable pyridoxal 5'-phosphate synthase subunit PDX1 OS=Hevea brasiliensis OX=3981 GN=PDX1 PE=2 SV=1  | -1.356 |
| Cs4g15090                                                                       | K01733 2.2e-298 cit:102628627 K01733 threonine synthase [EC:4.2.3.1]   (RefSeq) threonine synthase 1, chloroplastic                                           | Threonine synthase 1, chloroplastic OS=Arabidopsis thaliana OX=3702 GN=TS1 PE=1 SV=1                   | -1.164 |

**Table S12.** Differentially expressed genes (DEGs) related to ROS and aldehyde detoxification in low pH-treated *Citrus sinensis* leaves

| Accession No.                                                             | KEGG_annotation                                                                                                                                                | Swissprot_annotation (NR_annotation)                                                                                       | Log <sub>2</sub> (fold change) |
|---------------------------------------------------------------------------|----------------------------------------------------------------------------------------------------------------------------------------------------------------|----------------------------------------------------------------------------------------------------------------------------|--------------------------------|
| <i>Antioxidant activity (GO:0016209; adjusted P = 0.6065)</i>             |                                                                                                                                                                |                                                                                                                            |                                |
| Cs1g19540                                                                 | K00430 8.3e-83 cit:102611617 K00430 peroxidase [EC:1.11.1.7]   (RefSeq) peroxidase 47                                                                          | Peroxidase 47 OS=Arabidopsis thaliana OX=3702 GN=PER47 PE=2 SV=2                                                           | 1.667                          |
| Cs3g12000                                                                 | K04565 4.7e-25 cic:CICLE_v10002756mg K04565 superoxide dismutase, Cu-Zn family [EC:1.15.1.1]   (RefSeq) hypothetical protein                                   | Superoxide dismutase [Cu-Zn] 1 OS=Mesembryanthemum crystallinum OX=3544 GN=SODCC.1 PE=2 SV=1                               | 1.988                          |
| Cs3g19810                                                                 | K00434 8.8e-61 cit:102610460 K00434 L-ascorbate peroxidase [EC:1.11.1.11]   (RefSeq) probable L-ascorbate peroxidase 6, chloroplastic/mitochondrial isoform X1 | Probable L-ascorbate peroxidase 6, chloroplastic/mitochondrial OS=Oryza sativa subsp. japonica OX=39947 GN=APX6 PE=2 SV=1  | -1.375                         |
| Cs3g26690                                                                 | K03671 1.0e-10 lsv:111897912 K03671 thioredoxin 1   (RefSeq) thioredoxin H1-like                                                                               | Thioredoxin-like protein CDSP32, chloroplastic OS=Arabidopsis thaliana OX=3702 GN=CDSP32 PE=1 SV=1                         | -1.219                         |
| Cs7g19240                                                                 | K04564 1.7e-45 cic:CICLE_v10032233mg K04564 superoxide dismutase, Fe-Mn family [EC:1.15.1.1]   (RefSeq) hypothetical protein                                   | Superoxide dismutase [Fe] 2, chloroplastic OS=Arabidopsis thaliana OX=3702 GN=FSD2 PE=1 SV=1                               | -1.606                         |
| Cs8g15520                                                                 | K04565 1.9e-44 cit:102626642 K04565 superoxide dismutase, Cu-Zn family [EC:1.15.1.1]   (RefSeq) superoxide dismutase [Cu-Zn], chloroplastic                    | Superoxide dismutase [Cu-Zn], chloroplastic OS=Petunia hybrida OX=4102 GN=SODCP PE=2 SV=1                                  | 2,676                          |
|                                                                           |                                                                                                                                                                |                                                                                                                            |                                |
| <i>Sulfur compound metabolic process (GO:0006790, adjusted P =0.9726)</i> |                                                                                                                                                                |                                                                                                                            |                                |
| Cs2g17560                                                                 | K00133 8.1e-100 cic:CICLE_v10015633mg K00133 aspartate-semialdehyde dehydrogenase [EC:1.2.1.11]   (RefSeq) hypothetical protein                                | (Hypothetical protein CISIN_1g017153mg [Citrus sinensis])                                                                  | -1.064                         |
| Cs2g30390                                                                 | K00392 1.5e-205 cic:CICLE_v10014382mg K00392 sulfite reductase (ferredoxin) [EC:1.8.7.1]   (RefSeq) hypothetical protein                                       | Sulfite reductase [ferredoxin], chloroplastic (Fragment) OS=Glycine max OX=3847 GN=SIR PE=1 SV=1                           | -1.069                         |
| Cs3g11490                                                                 | K01738 3.2e-72 cic:CICLE_v10001793mg K01738 cysteine synthase [EC:2.5.1.47]   (RefSeq) hypothetical protein                                                    | Cysteine synthase, chloroplastic/chromoplastic OS=Solanum tuberosum OX=4113 PE=2 SV=1                                      | -1.300                         |
| Cs7g16390                                                                 | K22846 7.4e-82 cic:CICLE_v10031768mg K22846 S-sulfo-L-cysteine synthase (O-acetyl-L-serine-dependent) [EC:2.5.1.144]   (RefSeq) hypothetical protein           | S-sulfo-L-cysteine synthase (O-acetyl-L-serine-dependent), chloroplastic OS=Arabidopsis thaliana OX=3702 GN=CS26 PE=1 SV=1 | -2.495                         |

|                                                                                 |                                                                                                                                                                           |                                                                                                                            |        |
|---------------------------------------------------------------------------------|---------------------------------------------------------------------------------------------------------------------------------------------------------------------------|----------------------------------------------------------------------------------------------------------------------------|--------|
| orange1.1t01892                                                                 | K01251 1.7e-141 cit:102617645 K01251 adenosylhomocysteinase [EC:3.3.1.1]   (RefSeq) adenosylhomocysteinase                                                                | Adenosylhomocysteinase OS=Catharanthus roseus OX=4058 GN=SAHH PE=2 SV=1                                                    | -1.124 |
| <i>Sulfur amino acid biosynthetic process (GO:0000097, adjusted P = 0.3530)</i> |                                                                                                                                                                           |                                                                                                                            |        |
| Cs2g17560                                                                       | K00133 8.1e-100 cit:CICLE_v10015633mg K00133 aspartate-semialdehyde dehydrogenase [EC:1.2.1.11]   (RefSeq) hypothetical protein                                           | (Hypothetical protein CISIN_1g017153mg [Citrus sinensis])                                                                  | -1.064 |
| Cs2g30390                                                                       | K00392 1.5e-205 cit:CICLE_v10014382mg K00392 sulfite reductase (ferredoxin) [EC:1.8.7.1]   (RefSeq) hypothetical protein                                                  | Sulfite reductase [ferredoxin], chloroplastic (Fragment) OS=Glycine max OX=3847 GN=SIR PE=1 SV=1                           | -1.069 |
| Cs3g11490                                                                       | K01738 3.2e-72 cit:CICLE_v10001793mg K01738 cysteine synthase [EC:2.5.1.47]   (RefSeq) hypothetical protein                                                               | Cysteine synthase, chloroplastic/chromoplastic OS=Solanum tuberosum OX=4113 PE=2 SV=1                                      | -1.300 |
| Cs7g16390                                                                       | K22846 7.4e-82 cit:CICLE_v10031768mg K22846 S-sulfo-L-cysteine synthase (O-acetyl-L-serine-dependent) [EC:2.5.1.144]   (RefSeq) hypothetical protein                      | S-sulfo-L-cysteine synthase (O-acetyl-L-serine-dependent), chloroplastic OS=Arabidopsis thaliana OX=3702 GN=CS26 PE=1 SV=1 | -2.495 |
| <i>Glutathione metabolism (cit00480, corrected P = 0.8566)</i>                  |                                                                                                                                                                           |                                                                                                                            |        |
| Cs3g19810                                                                       | K00434 8.8e-61 cit:102610460 K00434 L-ascorbate peroxidase [EC:1.11.1.11]   (RefSeq) probable L-ascorbate peroxidase 6, chloroplastic/mitochondrial isoform X1            | Probable L-ascorbate peroxidase 6, chloroplastic/mitochondrial OS=Oryza sativa subsp. japonica OX=39947 GN=APX6 PE=2 SV=1  | -1.375 |
| Cs7g11110                                                                       | K00036 2.2e-114 cit:102624333 K00036 glucose-6-phosphate 1-dehydrogenase [EC:1.1.1.49 1.1.1.363]   (RefSeq) glucose-6-phosphate 1-dehydrogenase, chloroplastic isoform X1 | Glucose-6-phosphate 1-dehydrogenase, chloroplastic OS=Nicotiana tabacum OX=4097 PE=2 SV=1                                  | -1.151 |
| <i>Phytochelatin biosynthetic process (GO:0046938, adjusted P = 0.5264)</i>     |                                                                                                                                                                           |                                                                                                                            |        |
| Cs5g29460                                                                       | K05941 7.2e-112 cit:CICLE_v10024202mg K05941 glutathione gamma-glutamylcysteinyltransferase [EC:2.3.2.15]   (RefSeq) hypothetical protein                                 | Glutathione gamma-glutamylcysteinyltransferase 2 OS=Lotus japonicus OX=34305 GN=PCS2 PE=2 SV=2                             | 4.419  |
| <i>Sulfur compound transport (GO:0072348, adjusted P = 0.7303)</i>              |                                                                                                                                                                           |                                                                                                                            |        |
| Cs1g01730                                                                       | K17469 1.0e-119 cit:CICLE_v10025101mg K17469 sulfate transporter 2, low-affinity   (RefSeq) hypothetical protein                                                          | Sulfate transporter 2.1 OS=Arabidopsis thaliana OX=3702 GN=SULTR2;1 PE=2 SV=1                                              | 1.442  |

| <i>Ascorbate and aldarate metabolism (cit00053; corrected P = 0.0756)</i> |                                                                                                                                                                                   |                                                                                                                           |        |
|---------------------------------------------------------------------------|-----------------------------------------------------------------------------------------------------------------------------------------------------------------------------------|---------------------------------------------------------------------------------------------------------------------------|--------|
| Cs3g19820                                                                 | K00128 2.9e-44 cit:102611460 K00128 aldehyde dehydrogenase (NAD+) [EC:1.2.1.3]   (RefSeq) aldehyde dehydrogenase family 3 member H1                                               | Aldehyde dehydrogenase family 3 member H1 OS=Arabidopsis thaliana OX=3702 GN=ALDH3H1 PE=1 SV=2                            | -1.055 |
| Cs1g16030                                                                 | K00469 1.6e-45 cit:102618274 K00469 inositol oxygenase [EC:1.13.99.1]   (RefSeq) inositol oxygenase 1 isoform X1                                                                  | Inositol oxygenase 1 OS=Arabidopsis thaliana OX=3702 GN=MIOX1 PE=2 SV=1                                                   | -2.998 |
| Cs2g27950                                                                 | K08232 1.7e-134 cit:102611741 K08232 monodehydroascorbate reductase (NADH) [EC:1.6.5.4]   (RefSeq) monodehydroascorbate reductase 4, peroxisomal                                  | Monodehydroascorbate reductase 4, peroxisomal OS=Arabidopsis thaliana OX=3702 GN=MDAR4 PE=1 SV=1                          | -1.025 |
| Cs3g19810                                                                 | K00434 8.8e-61 cit:102610460 K00434 L-ascorbate peroxidase [EC:1.11.1.11]   (RefSeq) probable L-ascorbate peroxidase 6, chloroplastic/mitochondrial isoform X1                    | Probable L-ascorbate peroxidase 6, chloroplastic/mitochondrial OS=Oryza sativa subsp. japonica OX=39947 GN=APX6 PE=2 SV=1 | -1.375 |
| Cs2g27180                                                                 | K16190 4.9e-76 cit:CICLE_v10015593mg K16190 glucuronokinase [EC:2.7.1.43]   (RefSeq) hypothetical protein                                                                         | Glucuronokinase 1 OS=Arabidopsis thaliana OX=3702 GN=GLCAK1 PE=1 SV=1                                                     | 2.430  |
|                                                                           |                                                                                                                                                                                   |                                                                                                                           |        |
| <i>Vitamin B6 metabolism (cit00750; corrected P = 0.0181)</i>             |                                                                                                                                                                                   |                                                                                                                           |        |
| Cs1g14970                                                                 | K06215 3.8e-168 cit:102610004 K06215 pyridoxal 5'-phosphate synthase pdxS subunit [EC:4.3.3.6]   (RefSeq) pyridoxal 5'-phosphate synthase-like subunit PDX1.2                     | Pyridoxal 5'-phosphate synthase-like subunit PDX1.2 OS=Arabidopsis thaliana OX=3702 GN=PDX12 PE=1 SV=1                    | -1.362 |
| Cs1g18540                                                                 | K13248 3.8e-85 cit:CICLE_v10026096mg K13248 pyridoxal phosphate phosphatase PHOSPHO2 [EC:3.1.3.74]   (RefSeq) hypothetical protein                                                | Inorganic pyrophosphatase 1 OS=Arabidopsis thaliana OX=3702 GN=PS2 PE=1 SV=1                                              | 3.003  |
| Cs8g20230                                                                 | K06215 4.4e-175 cit:CICLE_v10028683mg K06215 pyridoxal 5'-phosphate synthase pdxS subunit [EC:4.3.3.6]   (RefSeq) hypothetical protein                                            | Probable pyridoxal 5'-phosphate synthase subunit PDX1 OS=Hevea brasiliensis OX=3981 GN=PDX1 PE=2 SV=1                     | -1.356 |
| Cs4g15090                                                                 | K01733 2.2e-298 cit:102628627 K01733 threonine synthase [EC:4.2.3.1]   (RefSeq) threonine synthase 1, chloroplastic                                                               | Threonine synthase 1, chloroplastic OS=Arabidopsis thaliana OX=3702 GN=TS1 PE=1 SV=1                                      | -1.164 |
|                                                                           |                                                                                                                                                                                   |                                                                                                                           |        |
| <i>Vitamin E biosynthetic process (GO:0010189, adjusted P = 0.4324)</i>   |                                                                                                                                                                                   |                                                                                                                           |        |
| Cs5g10740                                                                 | K10960 3.6e-141 cit:CICLE_v10020061mg K10960 geranylgeranyl diphosphate/geranylgeranyl-bacteriochlorophyllide a reductase [EC:1.3.1.83 1.3.1.111]   (RefSeq) hypothetical protein | Geranylgeranyl diphosphate reductase, chloroplastic OS=Arabidopsis thaliana OX=3702 GN=CHLP PE=1 SV=1                     | -1.716 |
|                                                                           |                                                                                                                                                                                   |                                                                                                                           |        |

| <i>Pentose phosphate pathway (cit00030; corrected P = 0.0029)</i> |                                                                                                                                                                           |                                                                                                          |        |
|-------------------------------------------------------------------|---------------------------------------------------------------------------------------------------------------------------------------------------------------------------|----------------------------------------------------------------------------------------------------------|--------|
| orange1.1t00226                                                   | K00615 1.8e-253 cic:CICLE_v10018991mg K00615 transketolase [EC:2.2.1.1]   (RefSeq) hypothetical protein                                                                   | Transketolase, chloroplastic OS=Zea mays OX=4577 PE=1 SV=1                                               | -1.337 |
| Cs3g10480                                                         | K01807 1.9e-150 cic:CICLE_v10002135mg K01807 ribose 5-phosphate isomerase A [EC:5.3.1.6]   (RefSeq) hypothetical protein                                                  | Probable ribose-5-phosphate isomerase 3, chloroplastic OS=Arabidopsis thaliana OX=3702 GN=RPI3 PE=1 SV=1 | -1.730 |
| Cs7g11110                                                         | K00036 2.2e-114 cit:102624333 K00036 glucose-6-phosphate 1-dehydrogenase [EC:1.1.1.49 1.1.1.363]   (RefSeq) glucose-6-phosphate 1-dehydrogenase, chloroplastic isoform X1 | Glucose-6-phosphate 1-dehydrogenase, chloroplastic OS=Nicotiana tabacum OX=4097 PE=2 SV=1                | -1.151 |
| Cs5g10920                                                         | K01783 3.3e-19 adu:107472214 K01783 ribulose-phosphate 3-epimerase [EC:5.1.3.1]   (RefSeq) ribulose-phosphate 3-epimerase, chloroplastic                                  | Ribulose-5-phosphate-3-epimerase, chloroplastic OS=Arabidopsis thaliana OX=3702 GN=RPE PE=2 SV=1         | -1.001 |
| Cs2g13700                                                         | K01807 3.2e-144 cit:102627714 K01807 ribose 5-phosphate isomerase A [EC:5.3.1.6]   (RefSeq) probable ribose-5-phosphate isomerase 2                                       | Probable ribose-5-phosphate isomerase 2 OS=Arabidopsis thaliana OX=3702 GN=RPI2 PE=1 SV=1                | -1.305 |
| Cs6g07430                                                         | K03841 1.5e-138 cic:CICLE_v10011855mg K03841 fructose-1,6-bisphosphatase I [EC:3.1.3.11]   (RefSeq) hypothetical protein                                                  | Fructose-1,6-bisphosphatase 1, chloroplastic OS=Arabidopsis thaliana OX=3702 GN=CFBP1 PE=1 SV=2          | -1.619 |
| orange1.1t05474                                                   | K01835 3.9e-26 cic:CICLE_v10014721mg K01835 phosphoglucomutase [EC:5.4.2.2]   (RefSeq) hypothetical protein                                                               | Phosphoglucomutase, cytoplasmic OS=Mesembryanthemum crystallinum OX=3544 GN=PGM1 PE=2 SV=1               | -1.607 |
| Cs2g17050                                                         | K01835 1.1e-16 cic:CICLE_v10014721mg K01835 phosphoglucomutase [EC:5.4.2.2]   (RefSeq) hypothetical protein                                                               | Probable phosphoglucomutase, cytoplasmic 1 OS=Arabidopsis thaliana OX=3702 GN=At1g23190 PE=2 SV=2        | -1.761 |
| <i>Others</i>                                                     |                                                                                                                                                                           |                                                                                                          |        |
| Cs3g01240                                                         | K01800 1.4e-22 cic:CICLE_v10002464mg K01800 maleylacetoacetate isomerase [EC:5.2.1.2]   (RefSeq) hypothetical protein                                                     | Glutathione S-transferase zeta class OS=Euphorbia esula OX=3993 PE=2 SV=1                                | 1.712  |
| orange1.1t03055                                                   | K00002 1.2e-61 cic:CICLE_v10012243mg K00002 alcohol dehydrogenase (NADP+) [EC:1.1.1.2]   (RefSeq) hypothetical protein                                                    | NADPH-dependent aldo-keto reductase, chloroplastic OS=Arabidopsis thaliana OX=3702 GN=AKR4C9 PE=1 SV=1   | -1.133 |
| orange1.1t04575                                                   | K19825 1.5e-53 cann:107868137 K19825 2-alkenal reductase (NADP+) [EC:1.3.1.102]   (RefSeq) 2-alkenal reductase (NADP(+)-dependent)                                        | 2-alkenal reductase (NADP(+)-dependent) OS=Nicotiana tabacum OX=4097 GN=DBR PE=1 SV=1                    | -1.431 |

**Table S13.** Specific primer pairs used for qRT-PCR analysis

| ID        | Description                                                 | Forward primers (5'→3') | Reverse primers (5'→3') |
|-----------|-------------------------------------------------------------|-------------------------|-------------------------|
| Cs1g05000 | <i>Actin</i>                                                | AGAACTATGAACTGCCTGATGGC | GCTTGGAGCAAGTGCTGTGATT  |
| Cs6g07480 | <i>B-tublin</i>                                             | CCCTTTACGACATCTGTTTCCG  | TGGCATCCACATTTGCTG      |
| Cs7g08440 | <i>U4/U6 small nuclear ribonucleoprotein PRP31 (PRPF31)</i> | ACTCATGGGAACGGCTGGTGGTC | TCGGCAGGCACGCATCCTTAGAG |
| Cs1g01730 |                                                             | ATACCGCCTTGATGGAAACA    | GCACTGCGTGAGAATGAACC    |
| Cs1g24500 | <i>Probable mitochondrial chaperone BCS1-B</i>              | ATTCGGTCAAACCTTGAGCATC  | ATCGGAGTCACGGGTAACAT    |
| Cs2g04080 | <i>ABC transporter B family member 9</i>                    | TCAACTCTTTCGGCTCCTCTG   | GCCTTTCCCCTGTCACCAT     |
| Cs2g05100 | <i>Magnesium-chelatase subunit ChII</i>                     | GTGATAGAGGAACGGGGAAAT   | TGTAGCACCCAATGGCAAA     |
| Cs2g20580 | <i>Probable tyrosine-protein phosphatase</i>                | AAGTCGCATCCGTCGTTG      | GAAAGGAAAAGTTGGCAGAGTC  |
| Cs3g01240 | <i>Glutathione S-transferase zeta class</i>                 | CGGCTTTGGTTGATGGAGA     | AGATCAGAAGGCAACAATGGA   |
| Cs3g12000 | <i>Superoxide dismutase [Cu-Zn]</i>                         | AAGGGCTGTTGTAGTCCACG    | ATGCCGCAAGCTACTCTGC     |
| Cs4g06150 | <i>Cytokinin dehydrogenase 7</i>                            | GGATGCTGAGTTGCTGGTGA    | CGGCGGTTTGAGGTAAGTG     |
| Cs4g15360 | <i>Protein phosphatase 2C 56</i>                            | AGGACCGATGAGGATGAGTGT   | GCGTCGCCTTCTTAGCAA      |
| Cs4g18140 |                                                             | GCGGAGACTTACACTGTTGGA   | ATTTCAGGGCTAGTTTCATG    |
| Cs4g18450 | <i>Fe (2+) transport protein 3,</i>                         | GCGGCTCACCATAGACATAAT   | CCAAAACCTGGGAAACGAC     |
| Cs4g18620 |                                                             | GCATCTTGGCGTGCTGTT      | TAGGGGTATCGCTATGGGAAT   |
| Cs5g10740 | <i>Geranylgeranyl diphosphate reductase, chloroplastic</i>  | GATGGATTTGCCGAGGAAC     | CATCAACCTCCAGCGTCCT     |
| Cs5g29460 | <i>Glutathione gamma-glutamylcysteinyltransferase 3</i>     | ATGGCAATGGCAGGACTTTA    | GTCCACAATACGCAGGCTCT    |
| Cs6g06020 |                                                             | CGGCAACCAGCAGCATT       | ATCCACCCCACTTCCTCAT     |
| Cs6g06030 |                                                             | TTGGCAGGGAGAAGAAGGTT    | GACGCAAGGGTTTGTAGATGG   |
| Cs6g09160 | <i>Mitoferrin</i>                                           | GTGGGGTCCCTAATAACTCAATG | TGGGCGTAATCACAGCATC     |
| Cs8g19450 | <i>Copper transporter 1</i>                                 | CCCGCCACAAAATGATGA      | CCGTGCCCCGTTTTGATC      |
| Cs8g03750 |                                                             | GCATTTCCCGATGTTACTCC    | CTATGTGAGCGGCAAGTGTTT   |
| Cs8g15520 | <i>Superoxide dismutase [Cu-Zn]</i>                         | TGCTGCCGCCAAGAAAG       | CAGTCGTAGGACCGCCATCT    |
| Cs8g16920 | <i>MLO-like protein 3</i>                                   | GCCTTGCCATCAGAGTCCA     | TTCCCGTAAAGAATCAGTCCAT  |
| Cs8g19460 | <i>Copper transporter 1</i>                                 | TGGGGCAAGAACTCTGAAAT    | AAGCAAGCCCAACCCTGA      |
| Cs9g18020 | <i>Probable protein phosphatase 2C 51</i>                   | AAGAAGGCACGCACTAATACTG  | CCCCATACACCCTAACTCAACT  |

|                 |                                              |                        |                       |
|-----------------|----------------------------------------------|------------------------|-----------------------|
| orange1.1t01343 | <i>Calcium-transporting ATPase 9</i>         | TGTCTTCACGGGAGTTACAAAA | GAGTCTTCGGAAGTGAATCAT |
| orange1.1t01850 | <i>Two-component response regulator ARR9</i> | AATCGCAACGGCAACAA      | CCTCTTCCAGGGCTTTTCTC  |
| orange1.1t02212 |                                              | CTGGAATTAAACTTGCCCTGTG | GCCGCAATCAAACCAACC    |

---
